Document S6. The following figures contain plots for each of three meteorological parameters (i.e., thermal height, thermal velocity, and wind speed; left axis) and raw  $\ln(rf)$  values (right axis) plotted against months in the annual cycle for each of the 25 California ecoregions examined in the study. LOESS smoothers are plotted for both sets of data.

EcoRegion=8

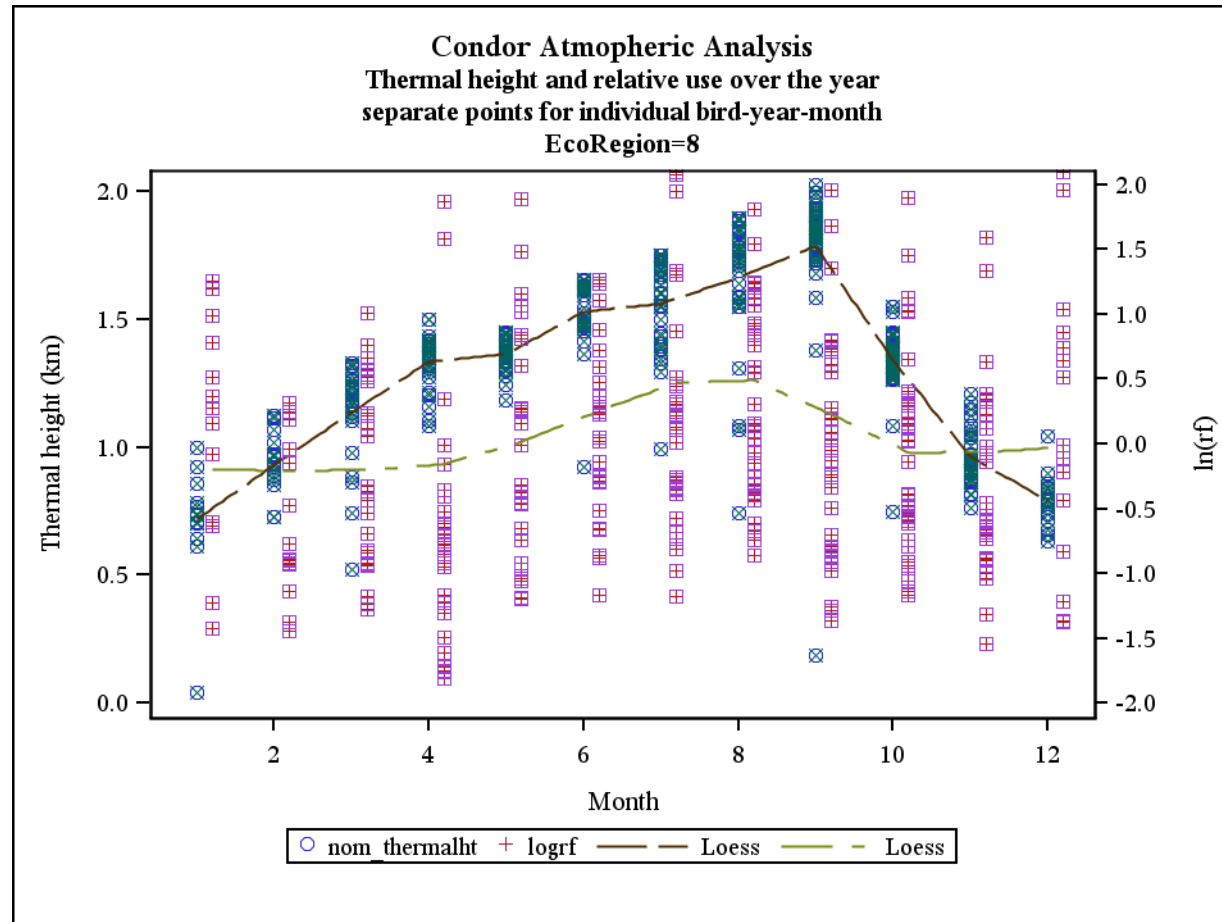

EcoRegion=9

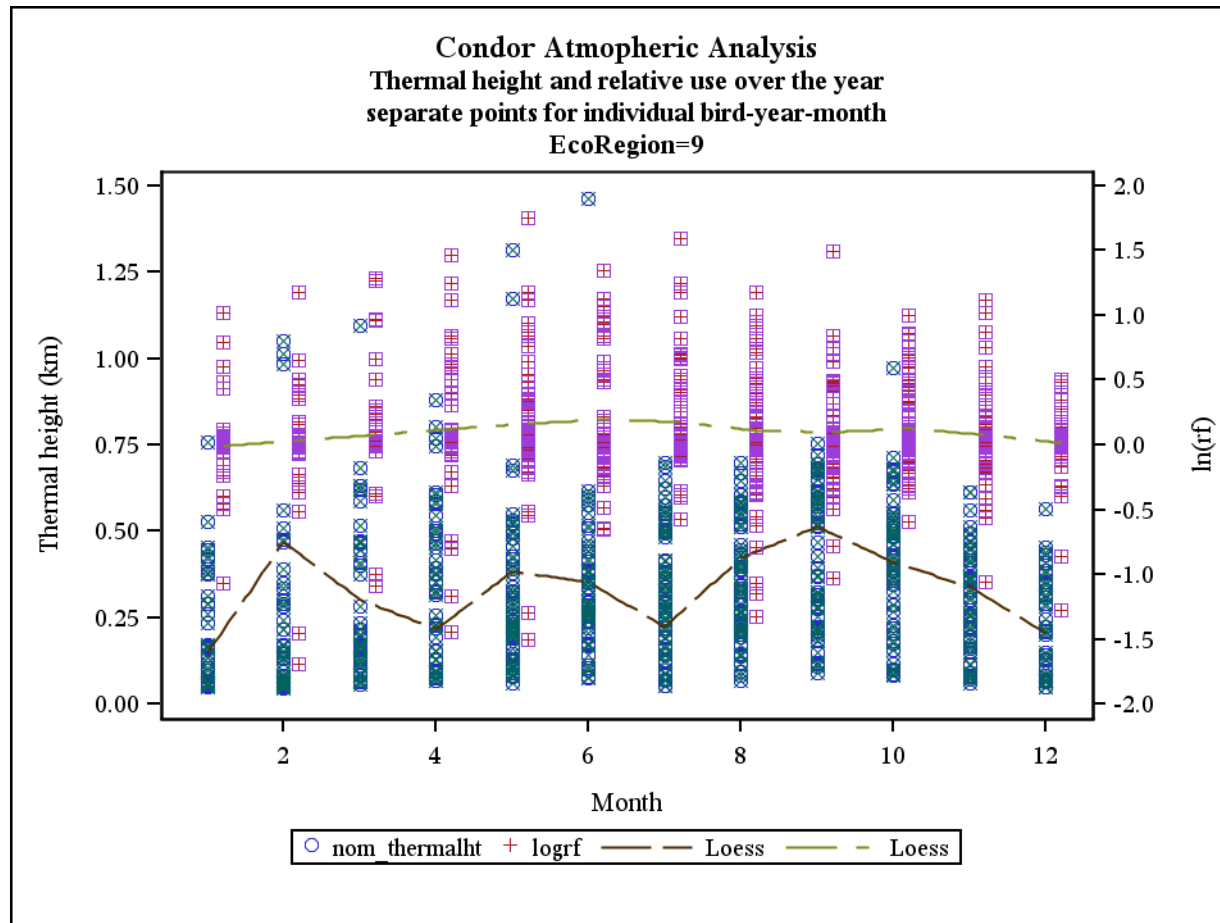

EcoRegion=10

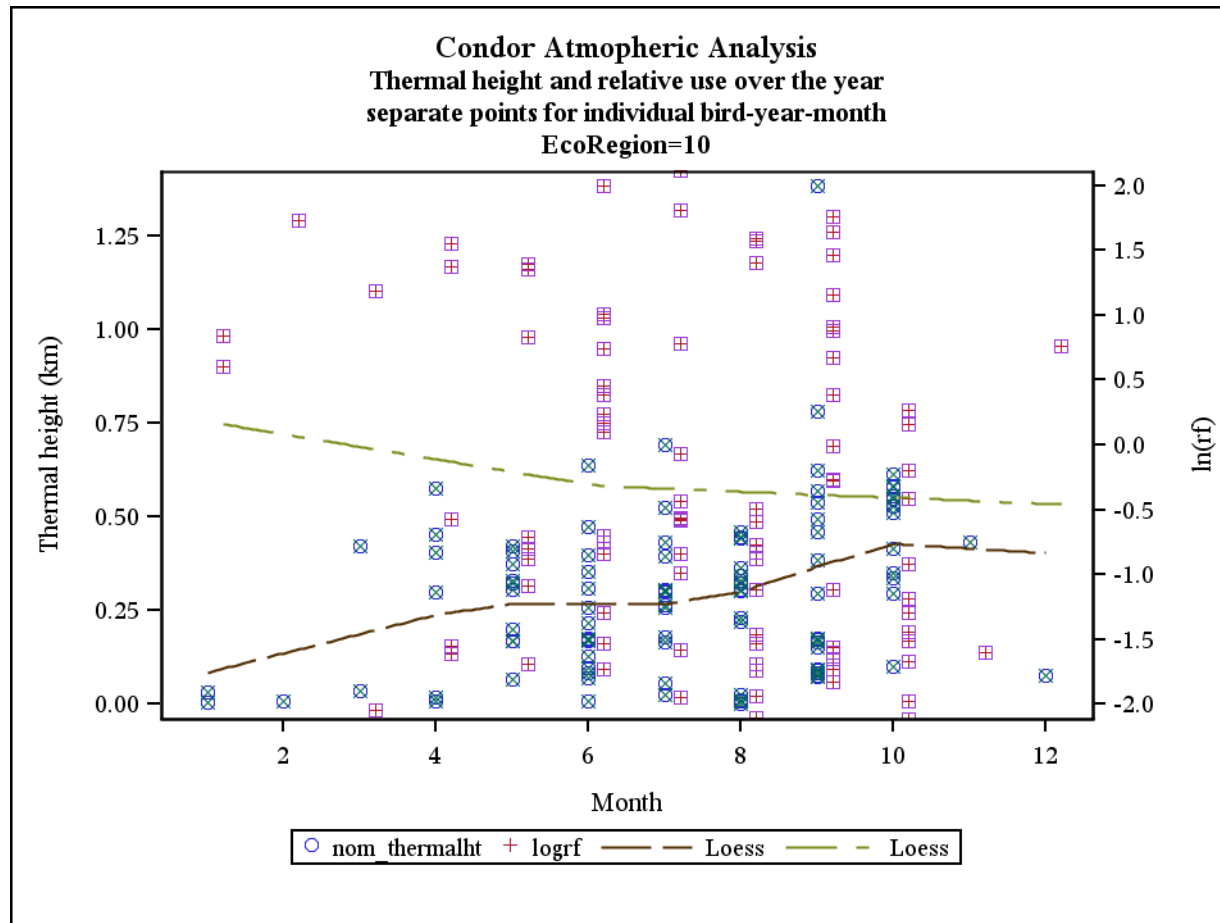



EcoRegion=15

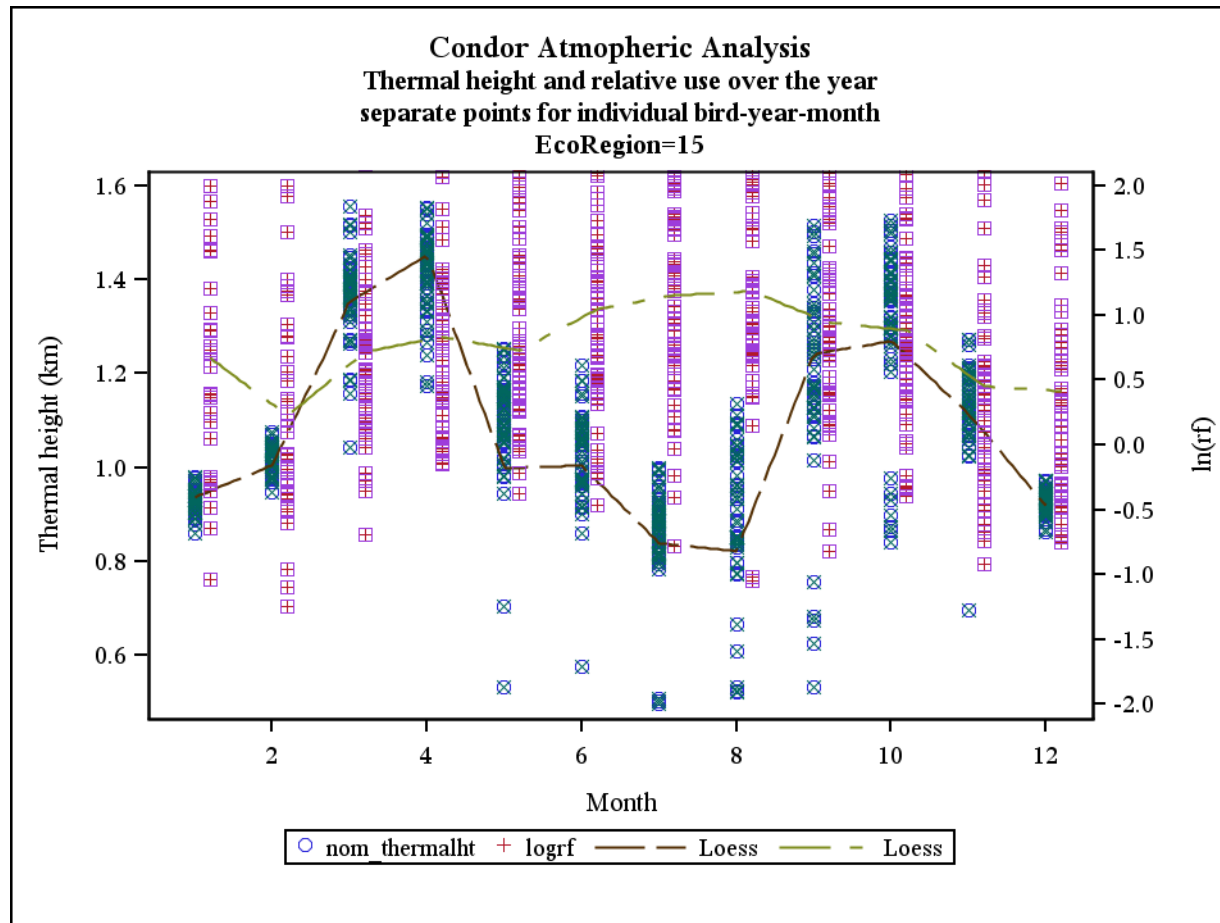

EcoRegion=16

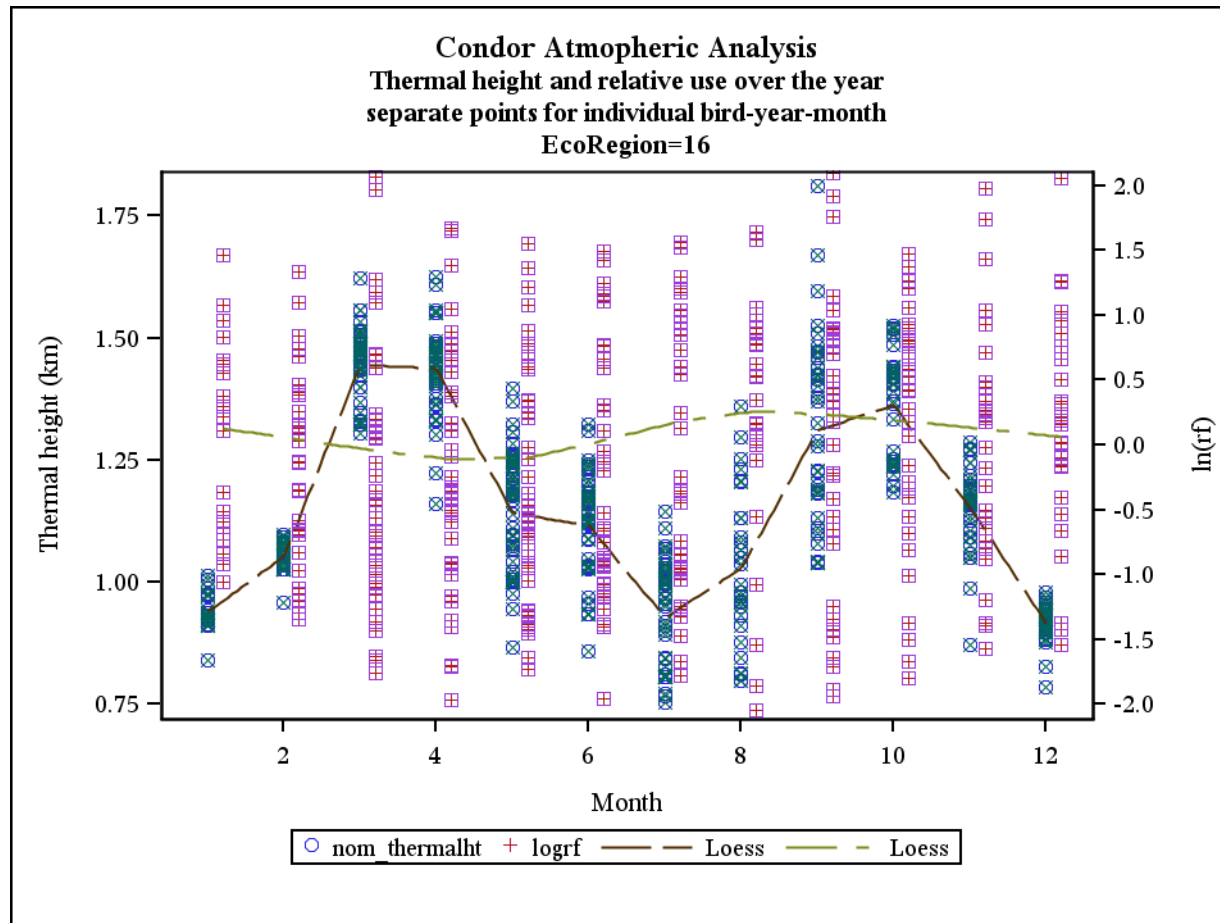

EcoRegion=18

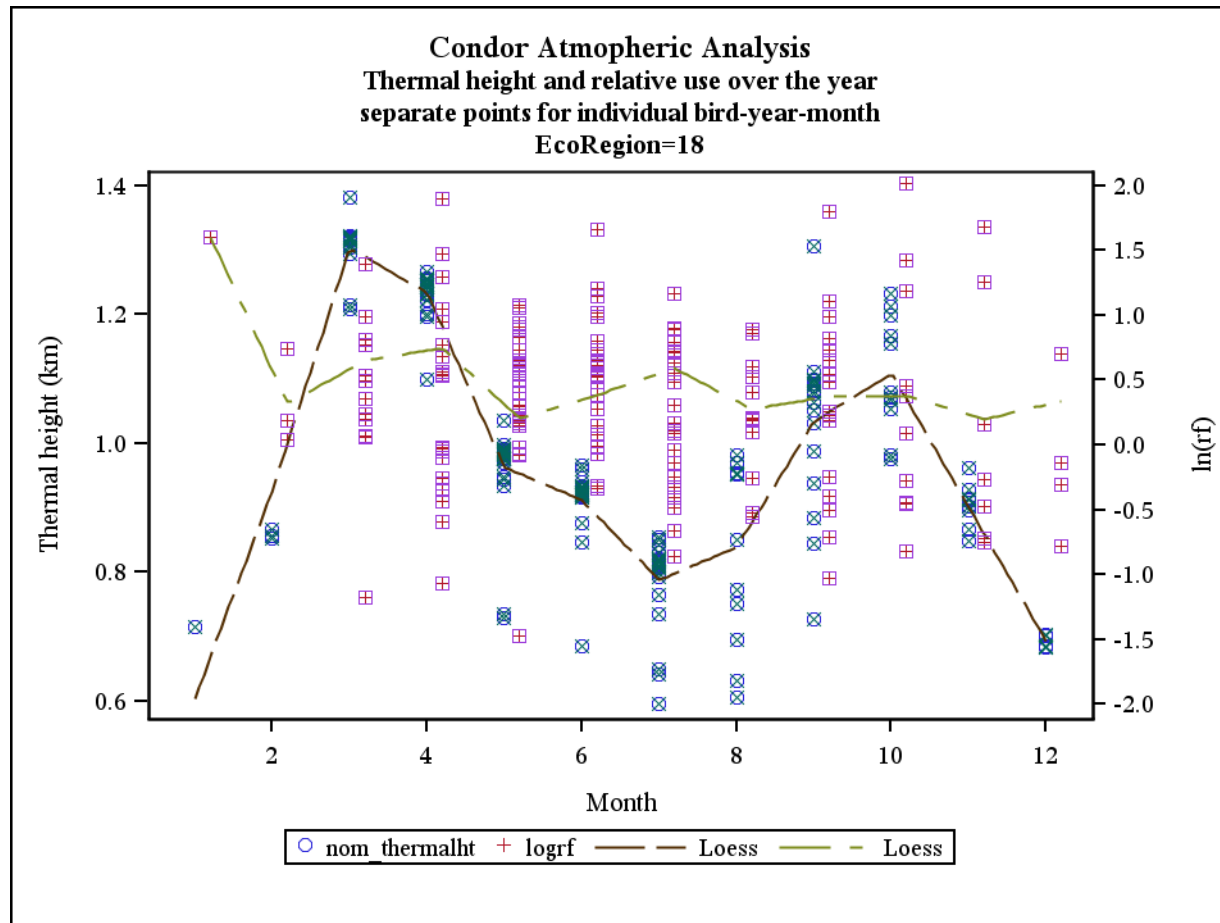

EcoRegion=39

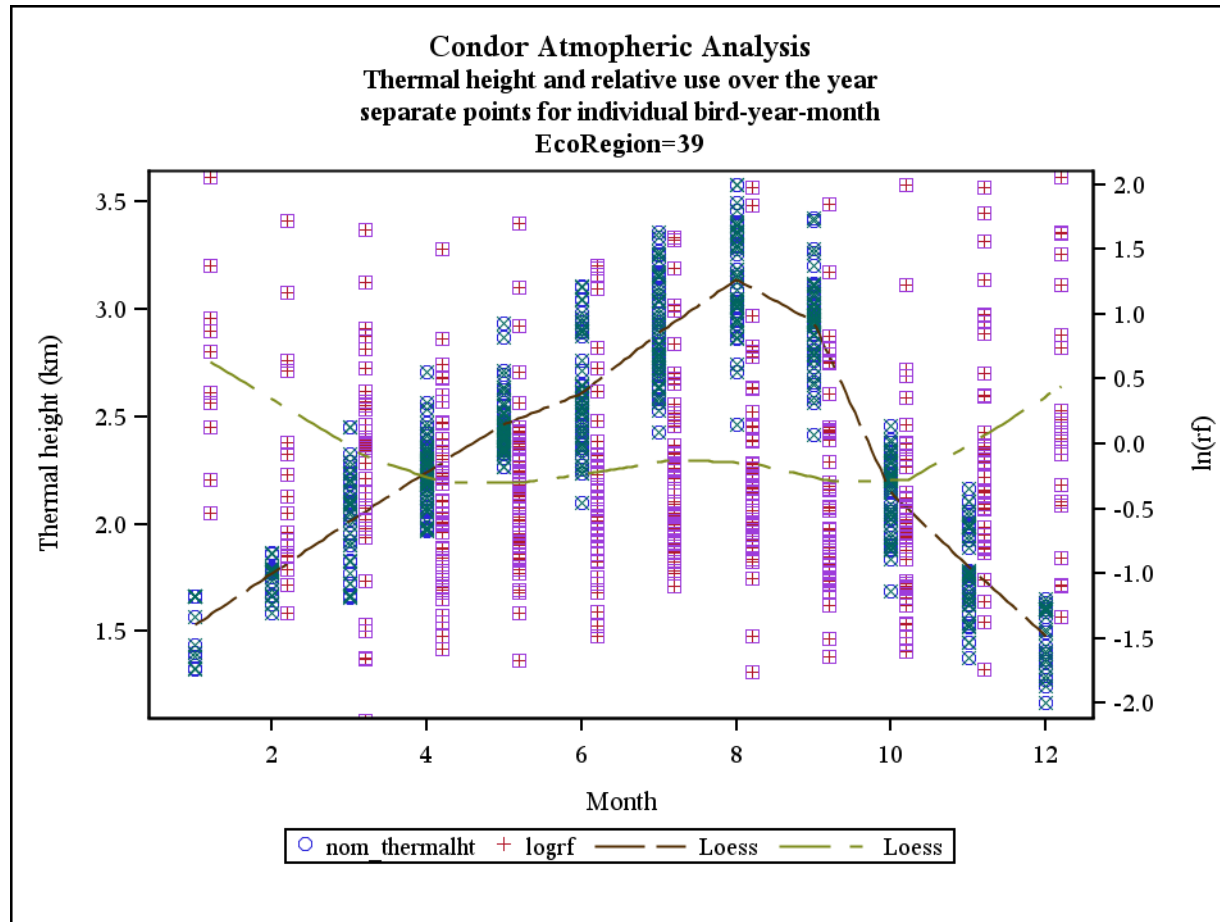

EcoRegion=40

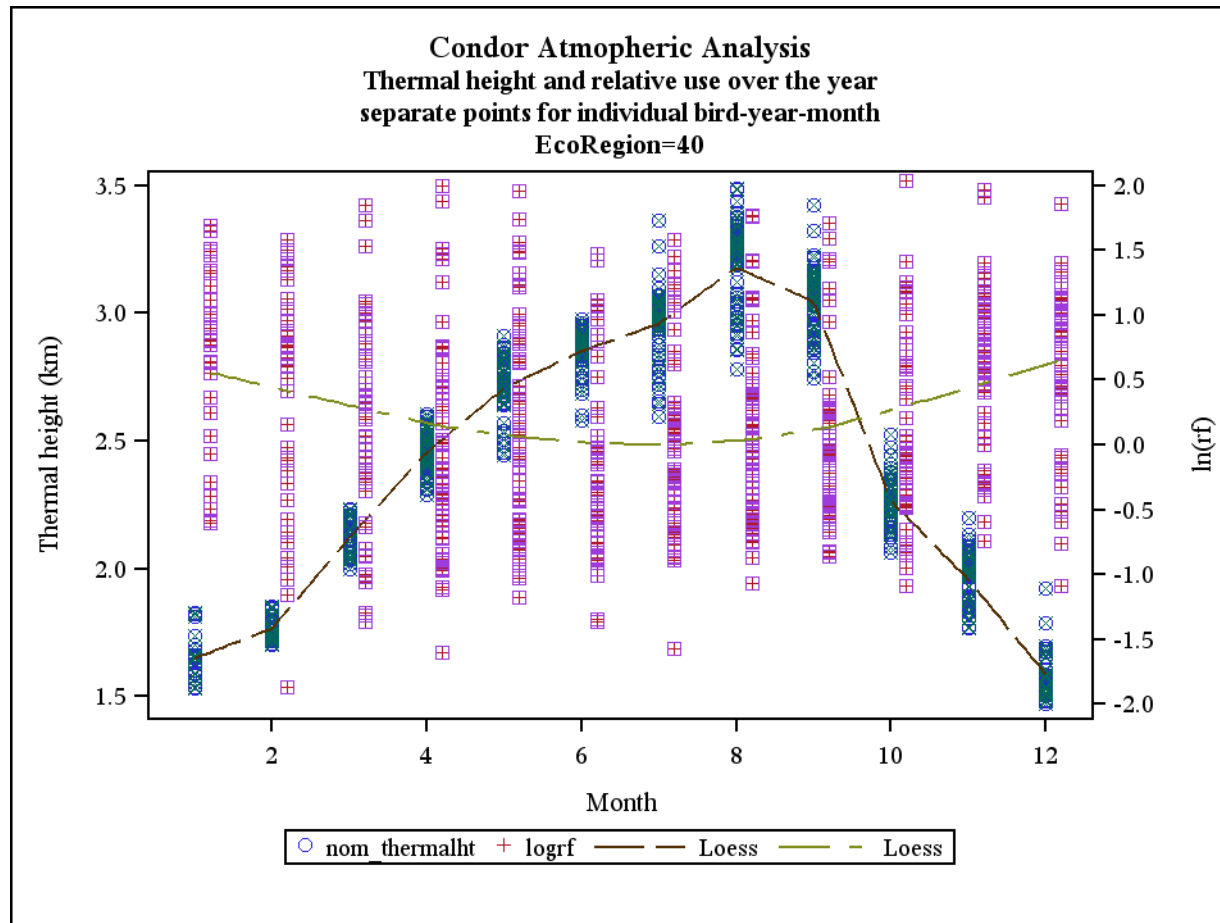

EcoRegion=95

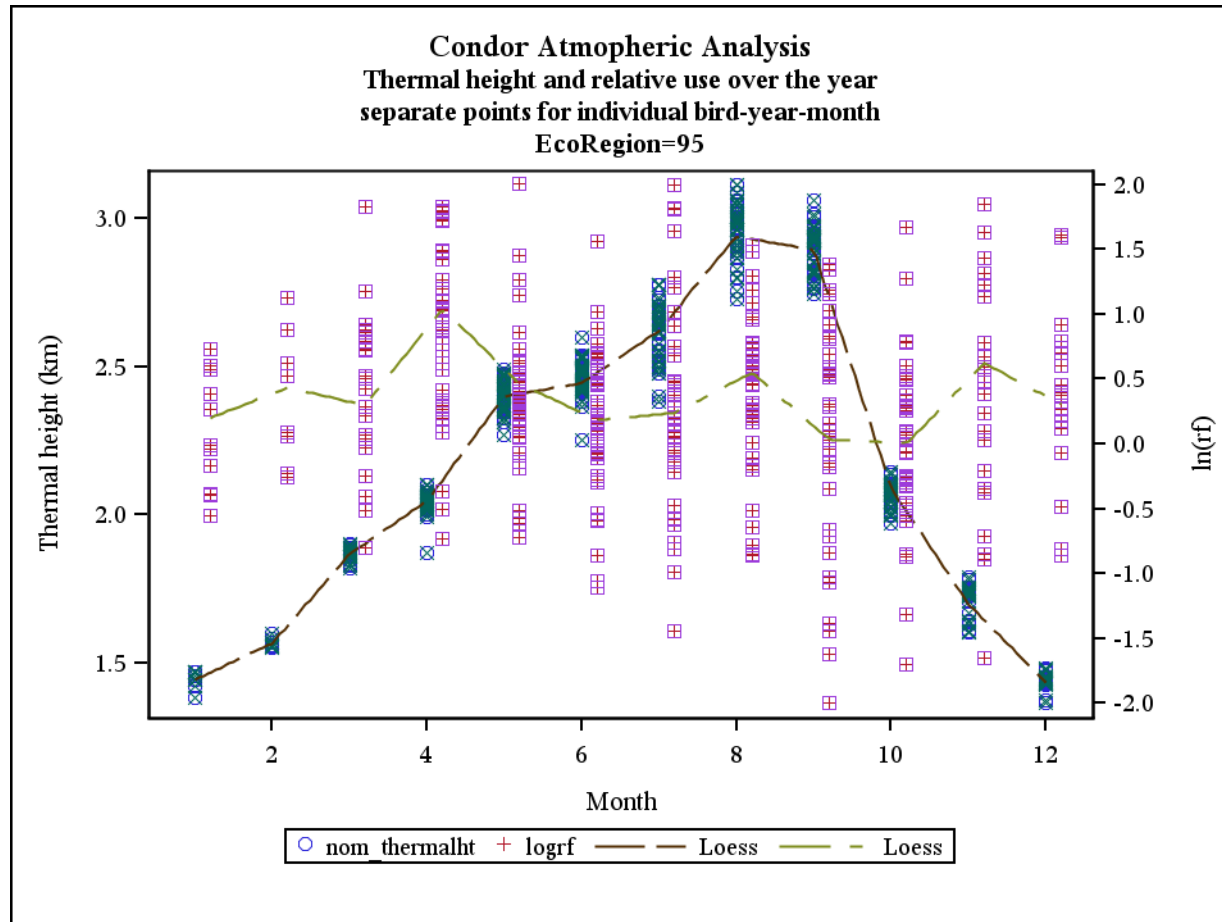

EcoRegion=101

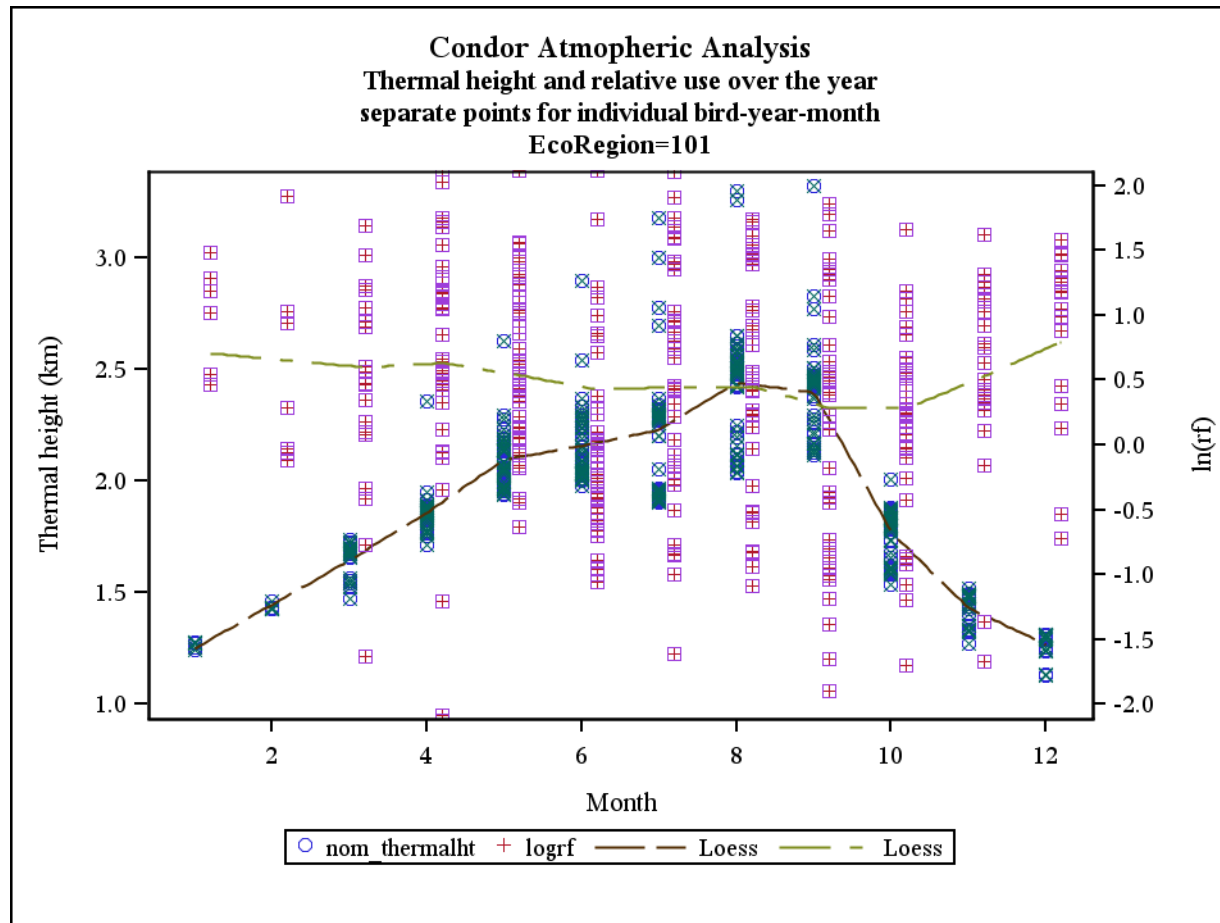

EcoRegion=102

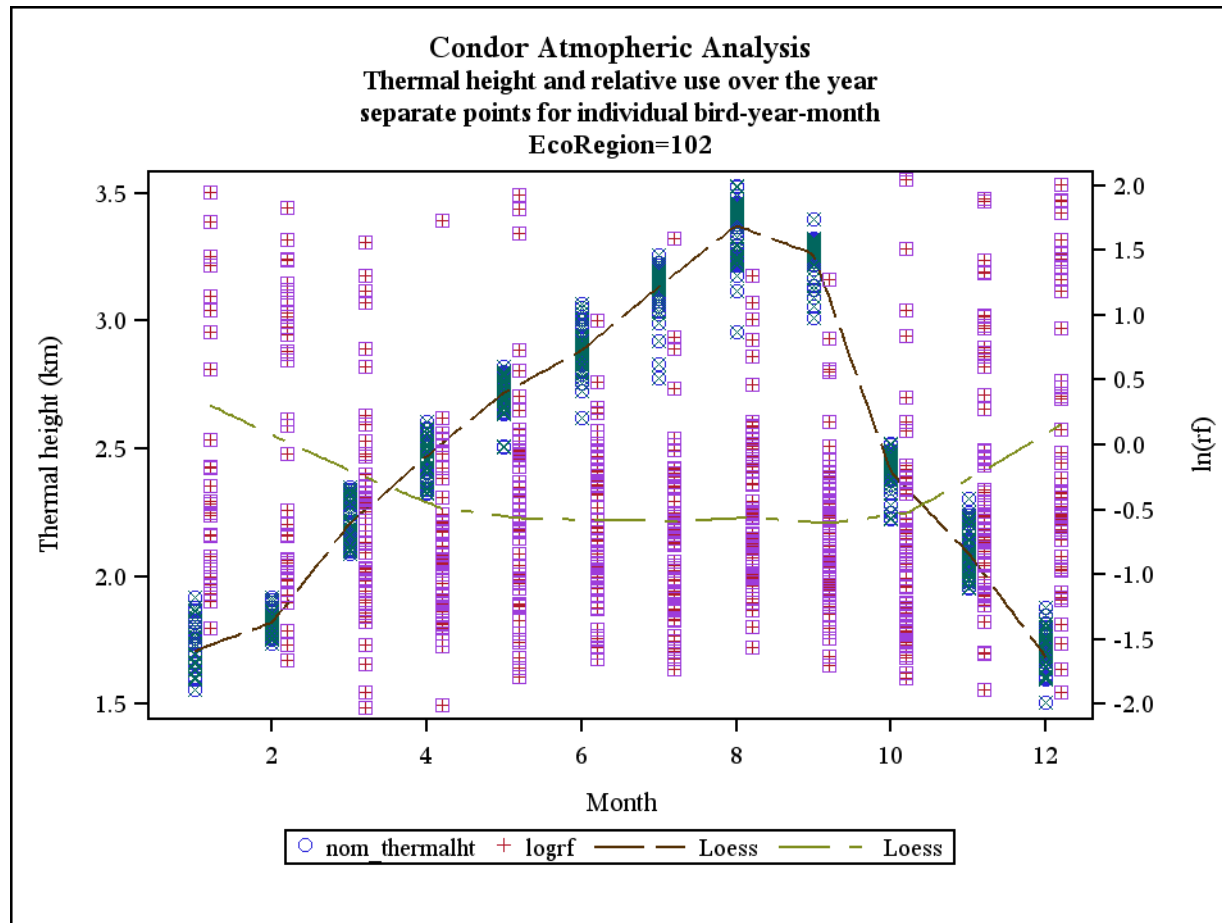

EcoRegion=116

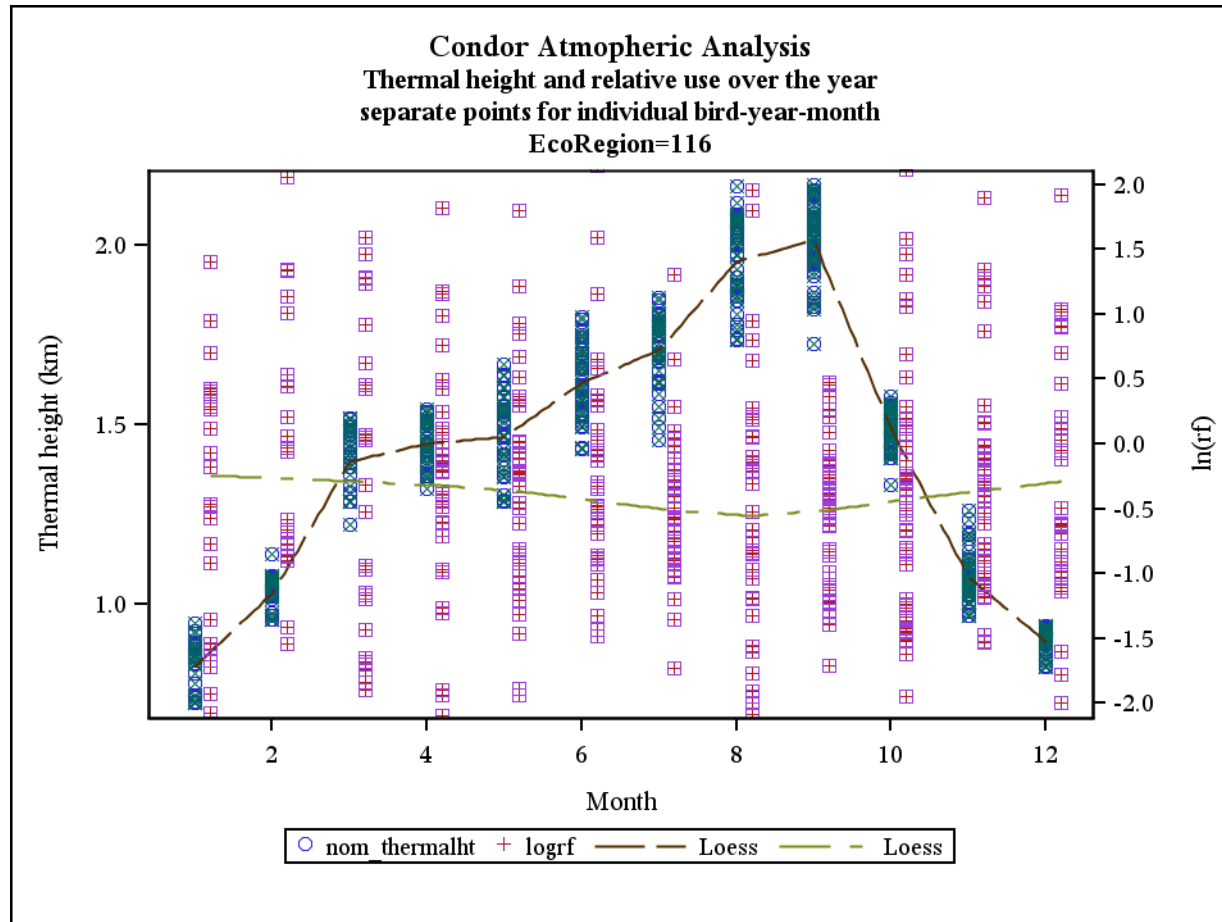

EcoRegion=117

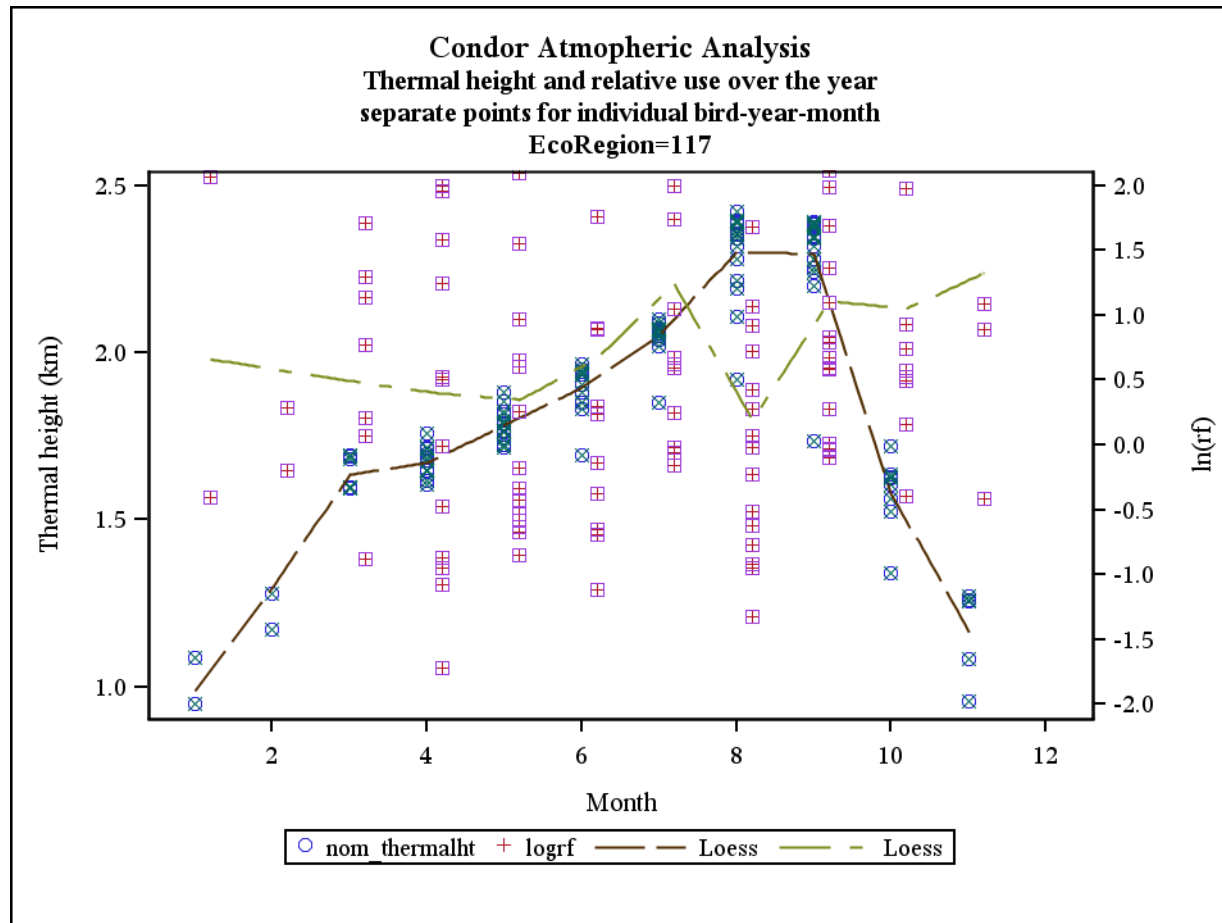

EcoRegion=118

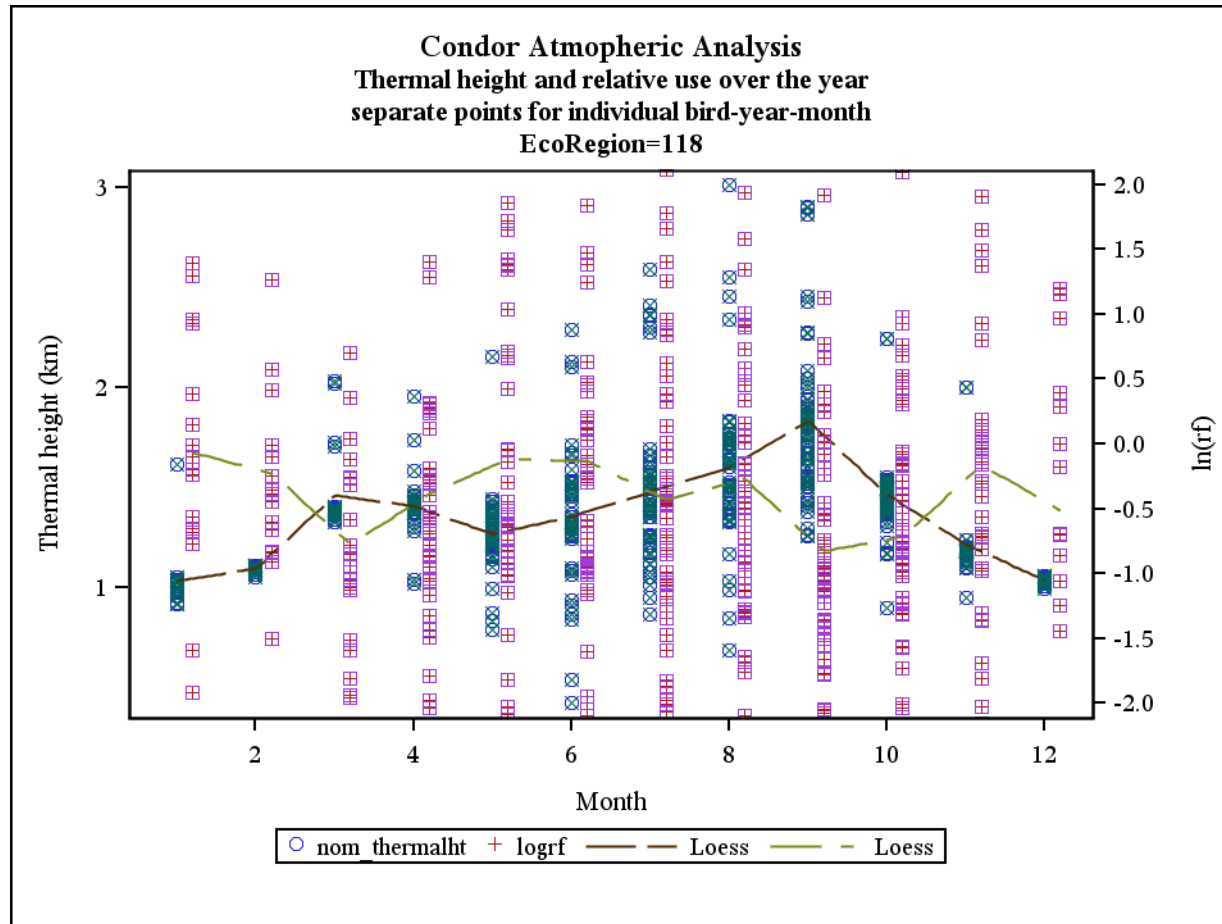

EcoRegion=119

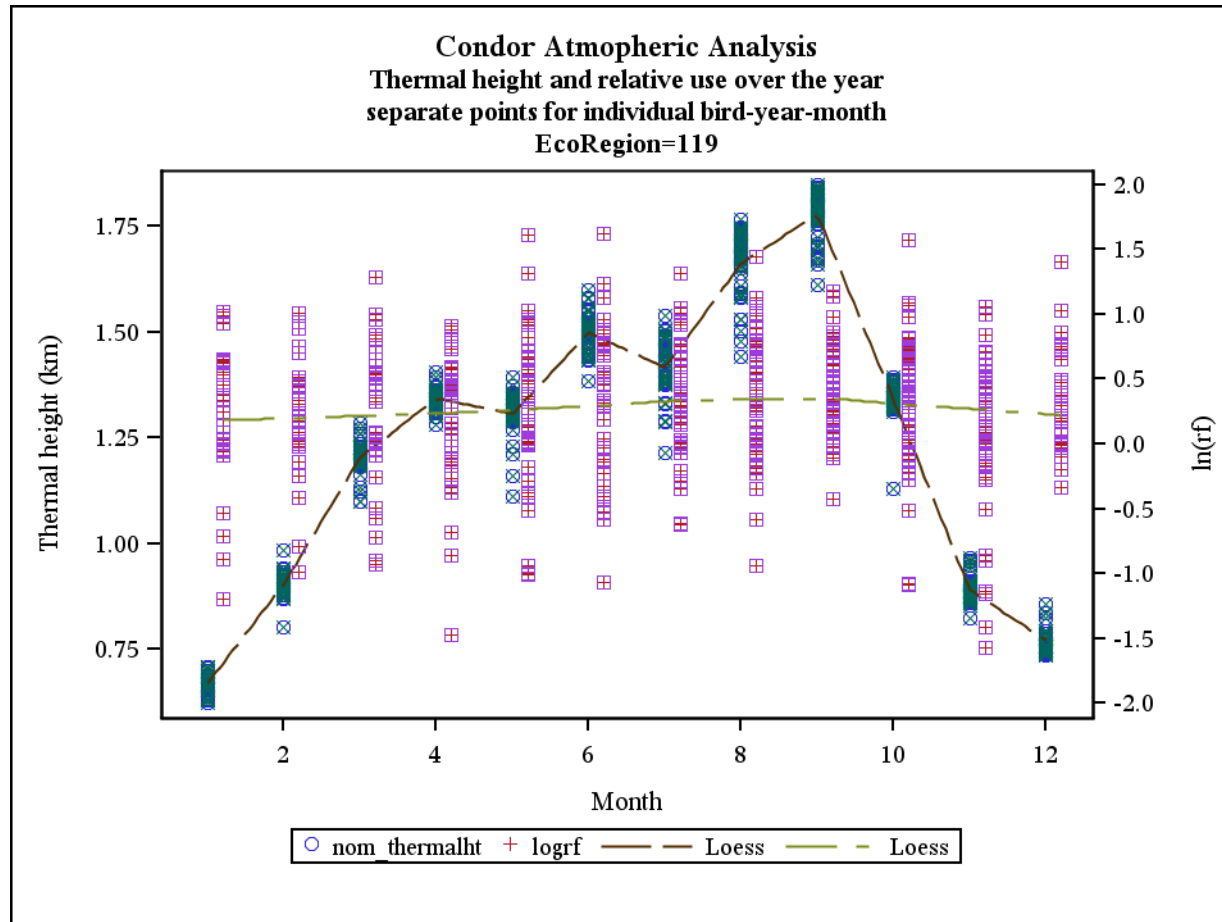

EcoRegion=123

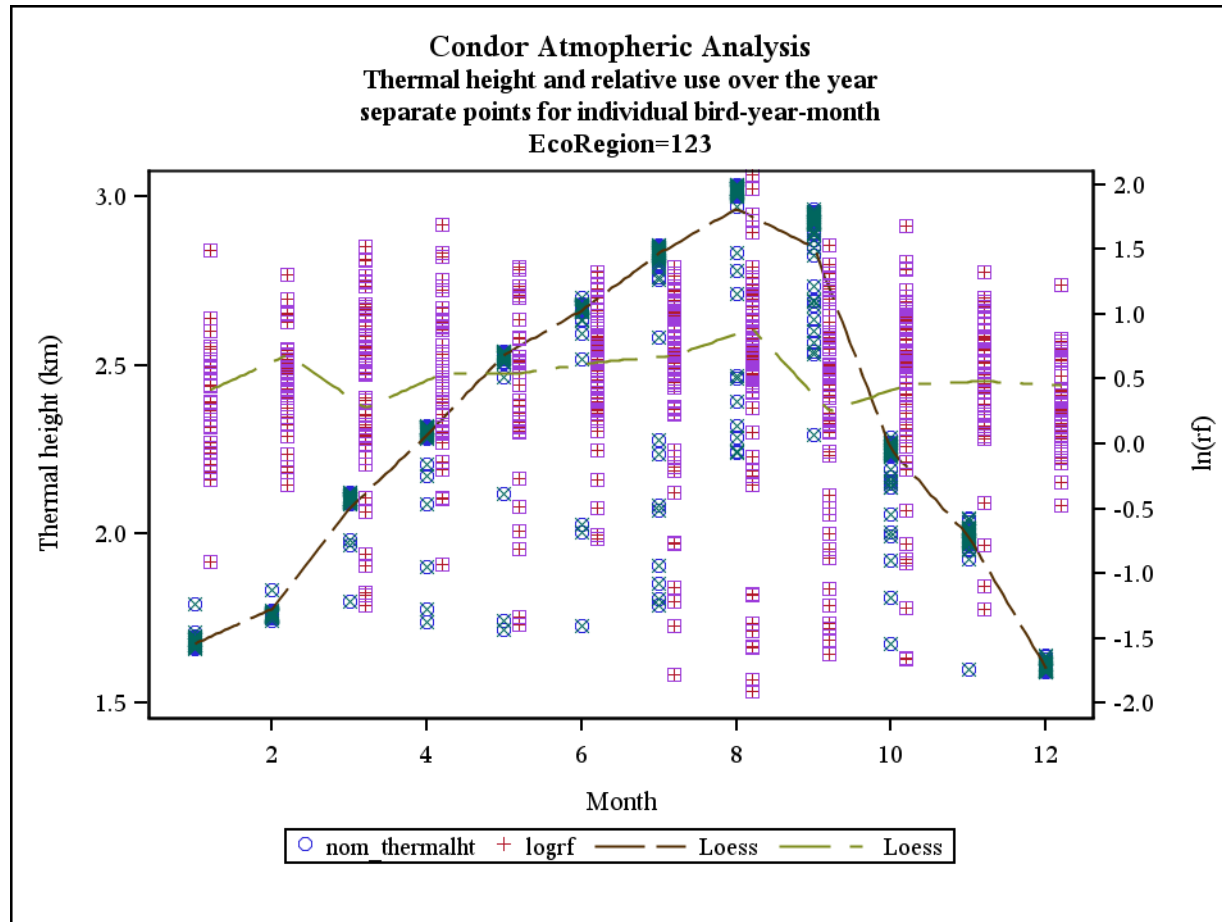

EcoRegion=124

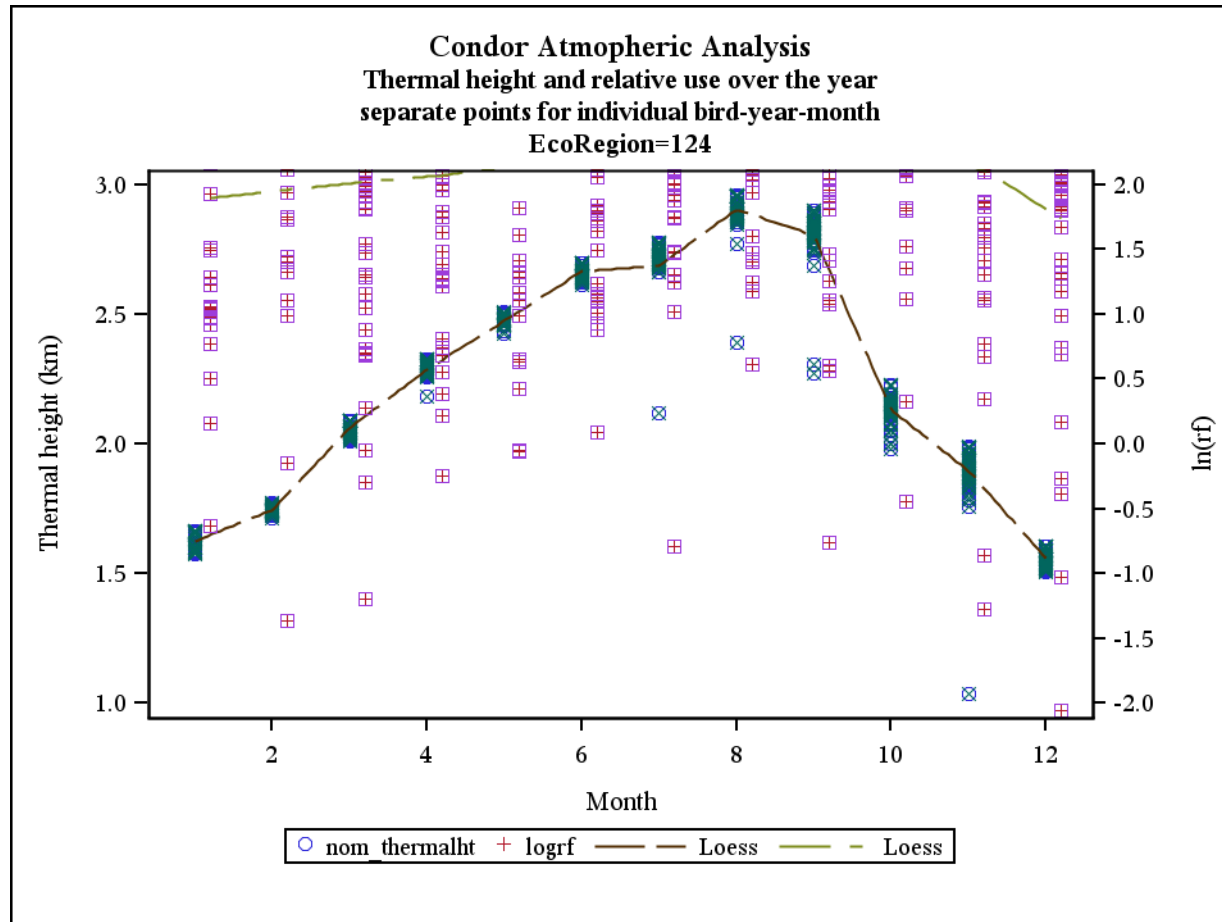

EcoRegion=125

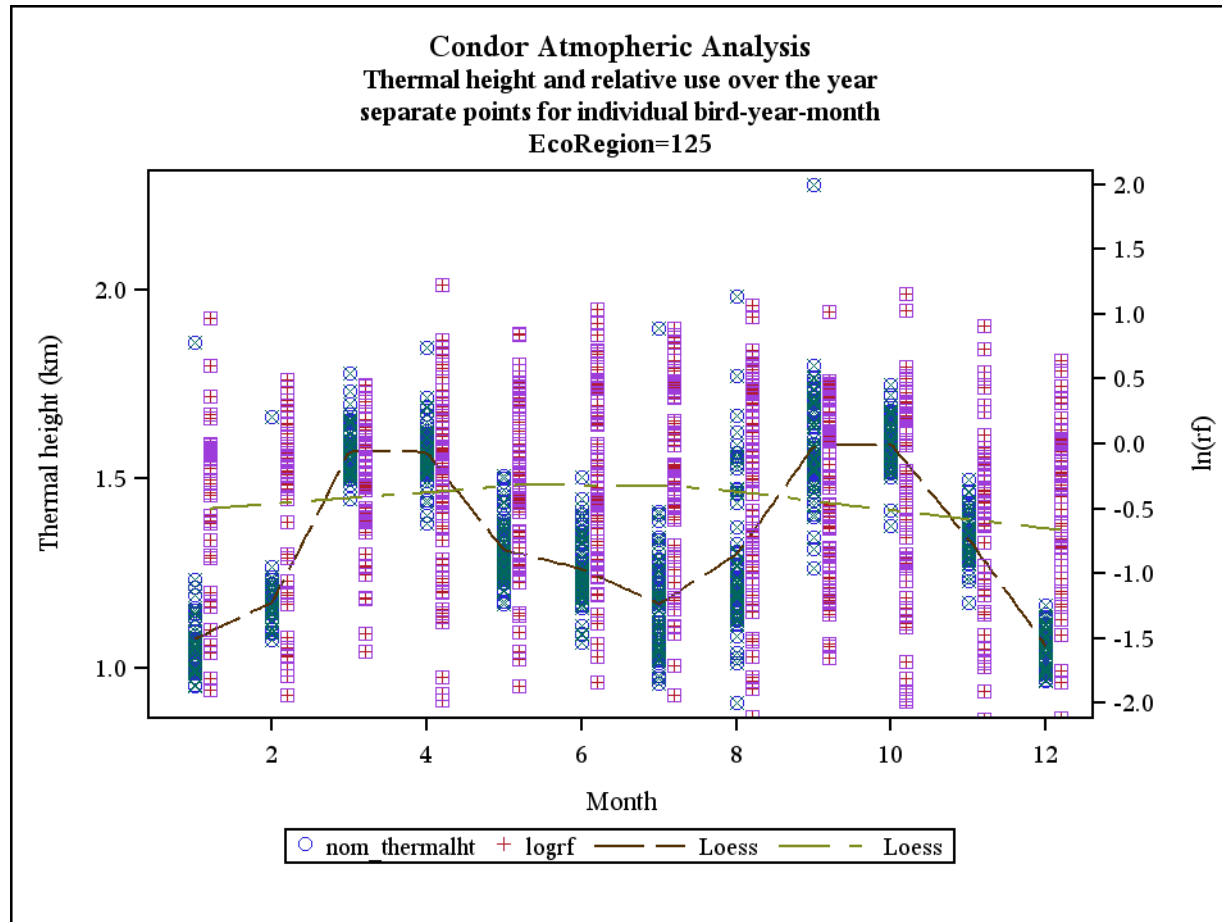

EcoRegion=126

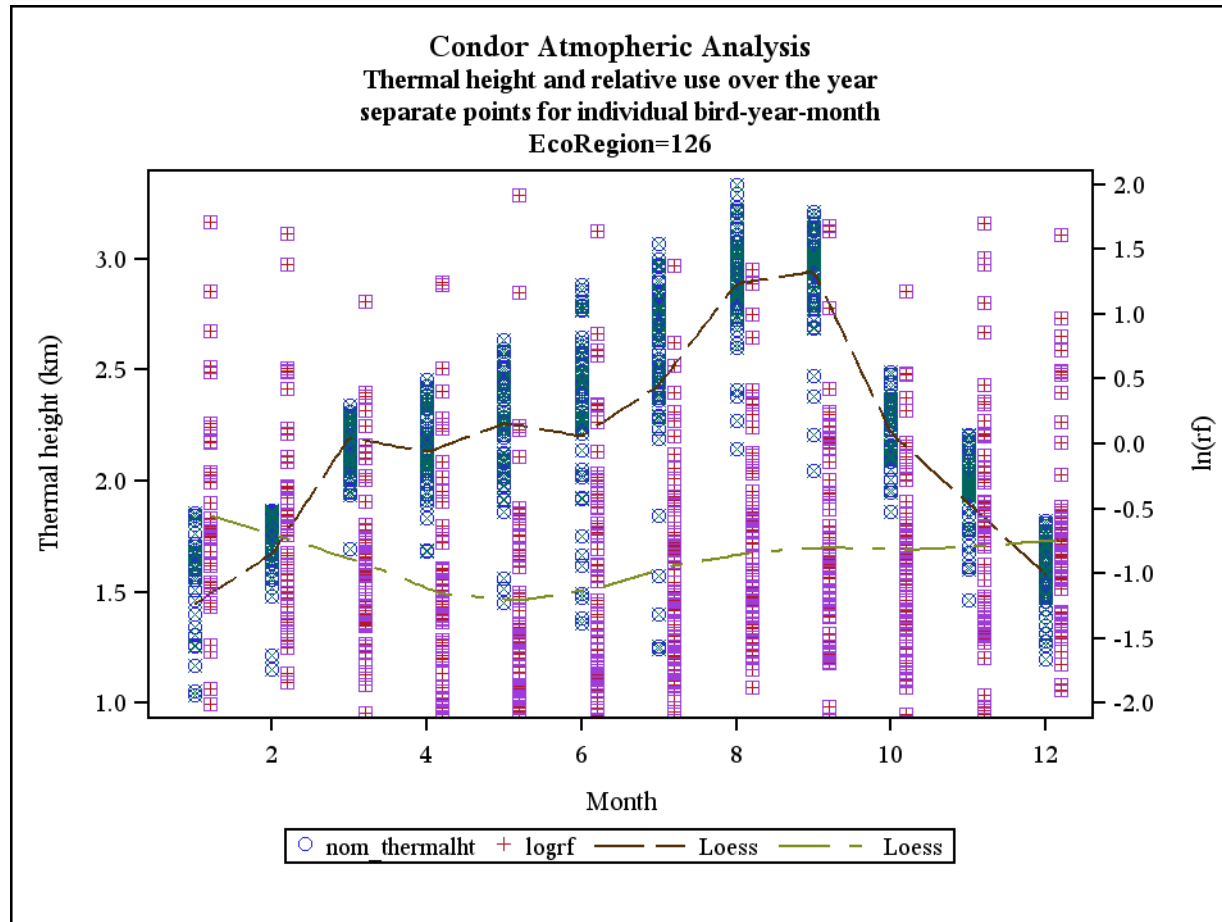

EcoRegion=127

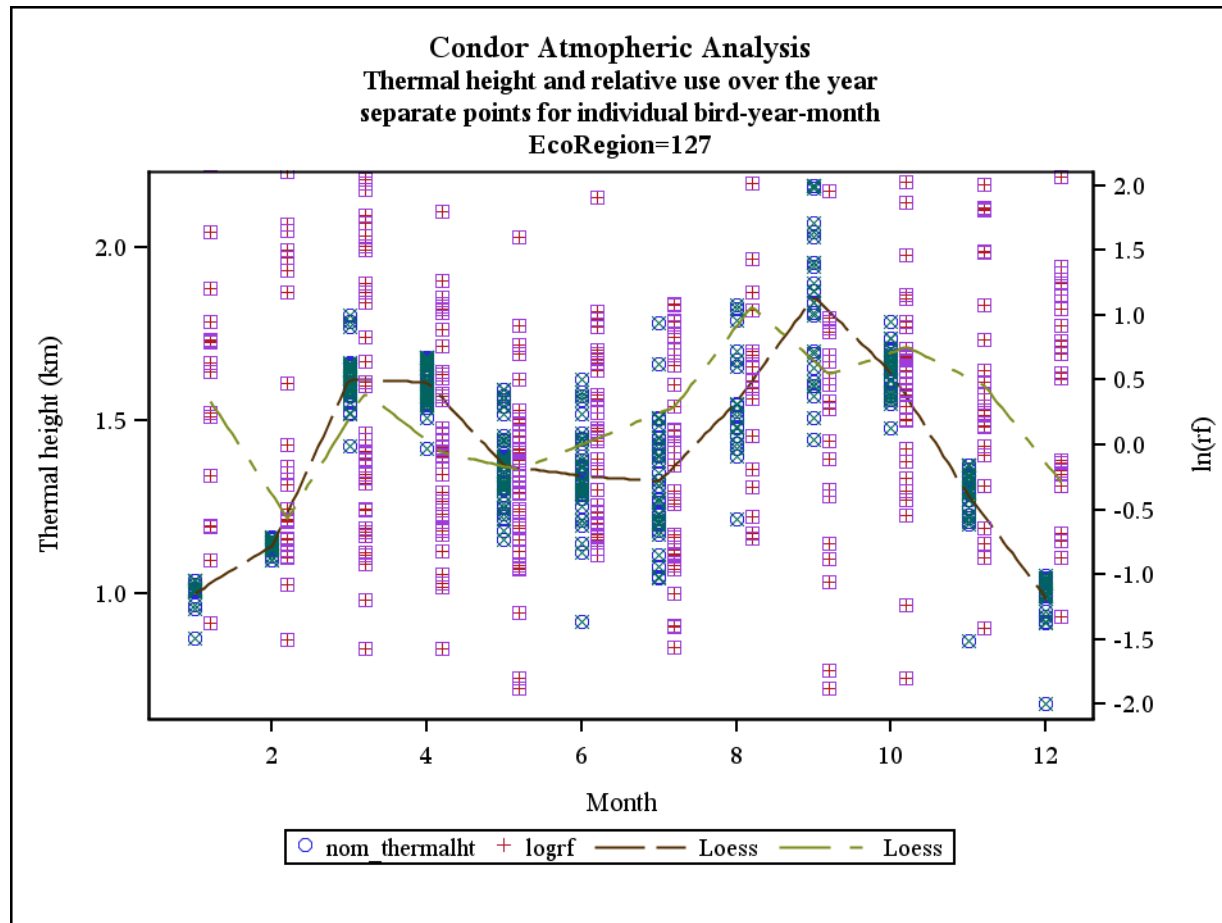

EcoRegion=128

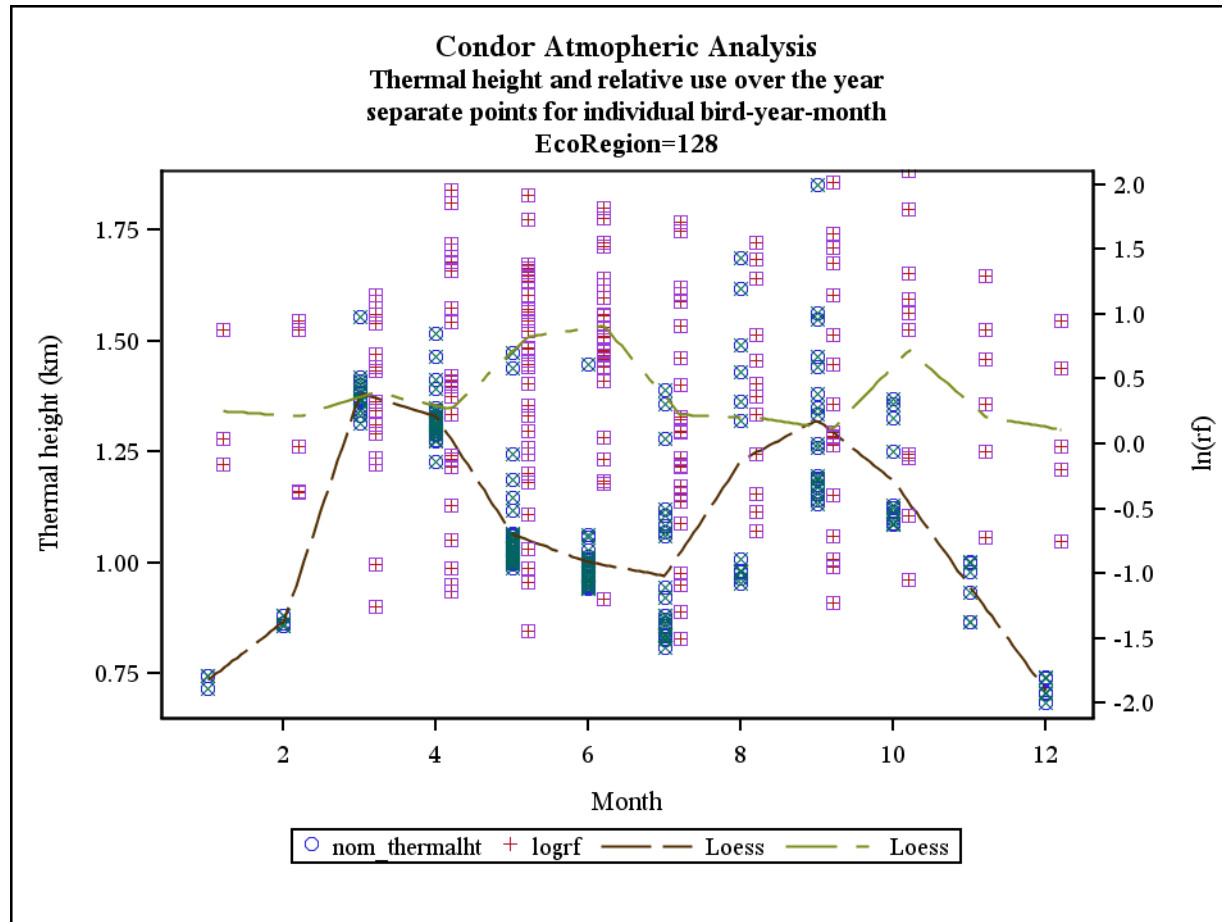

EcoRegion=147

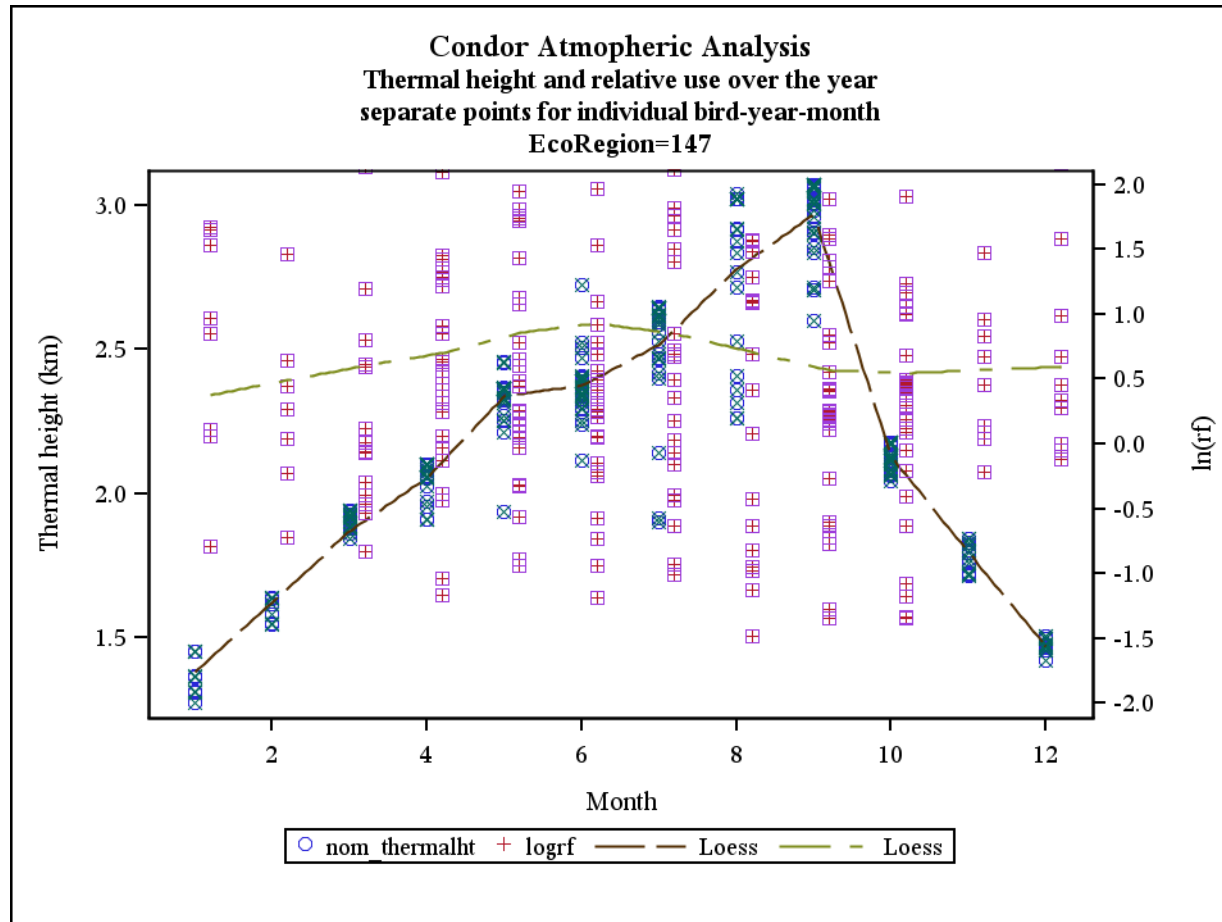

EcoRegion=192

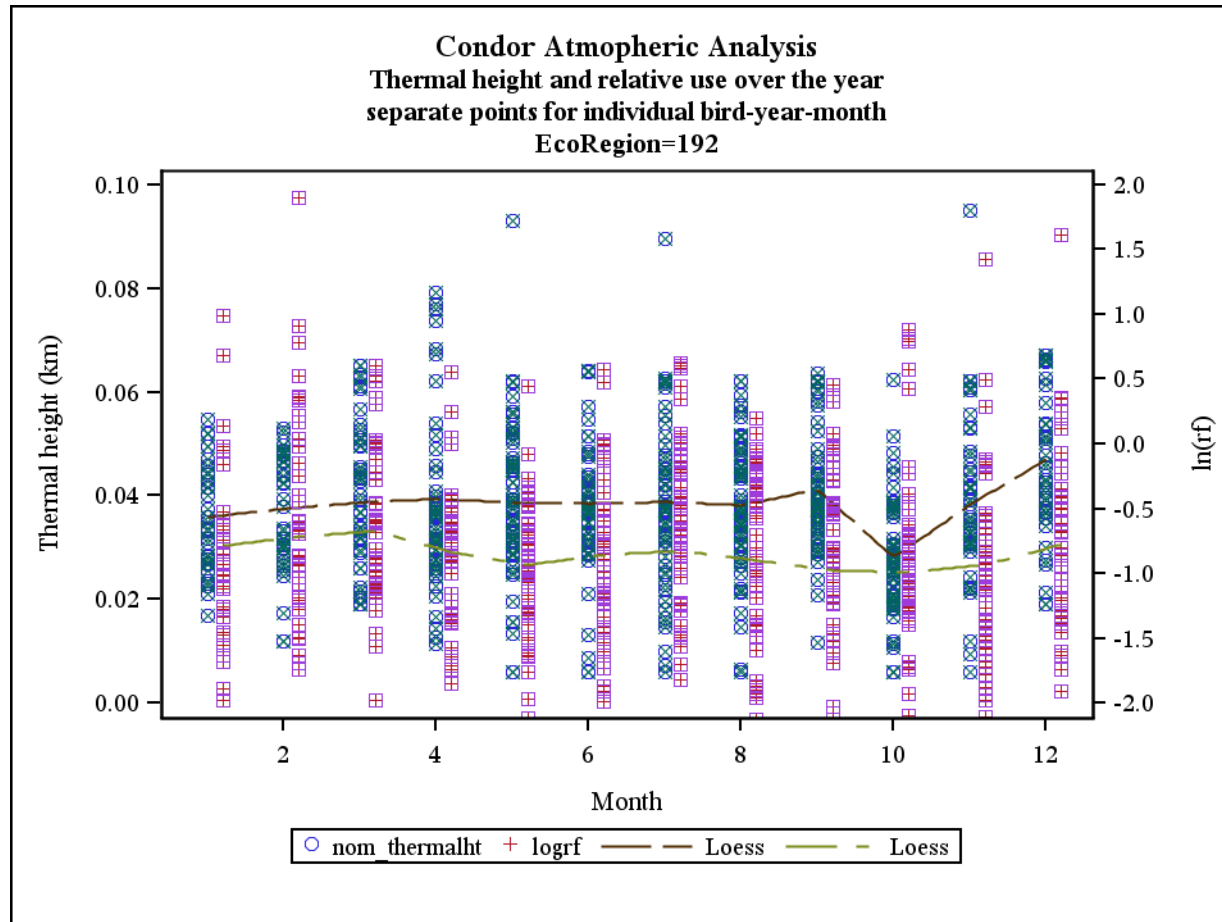

EcoRegion=193

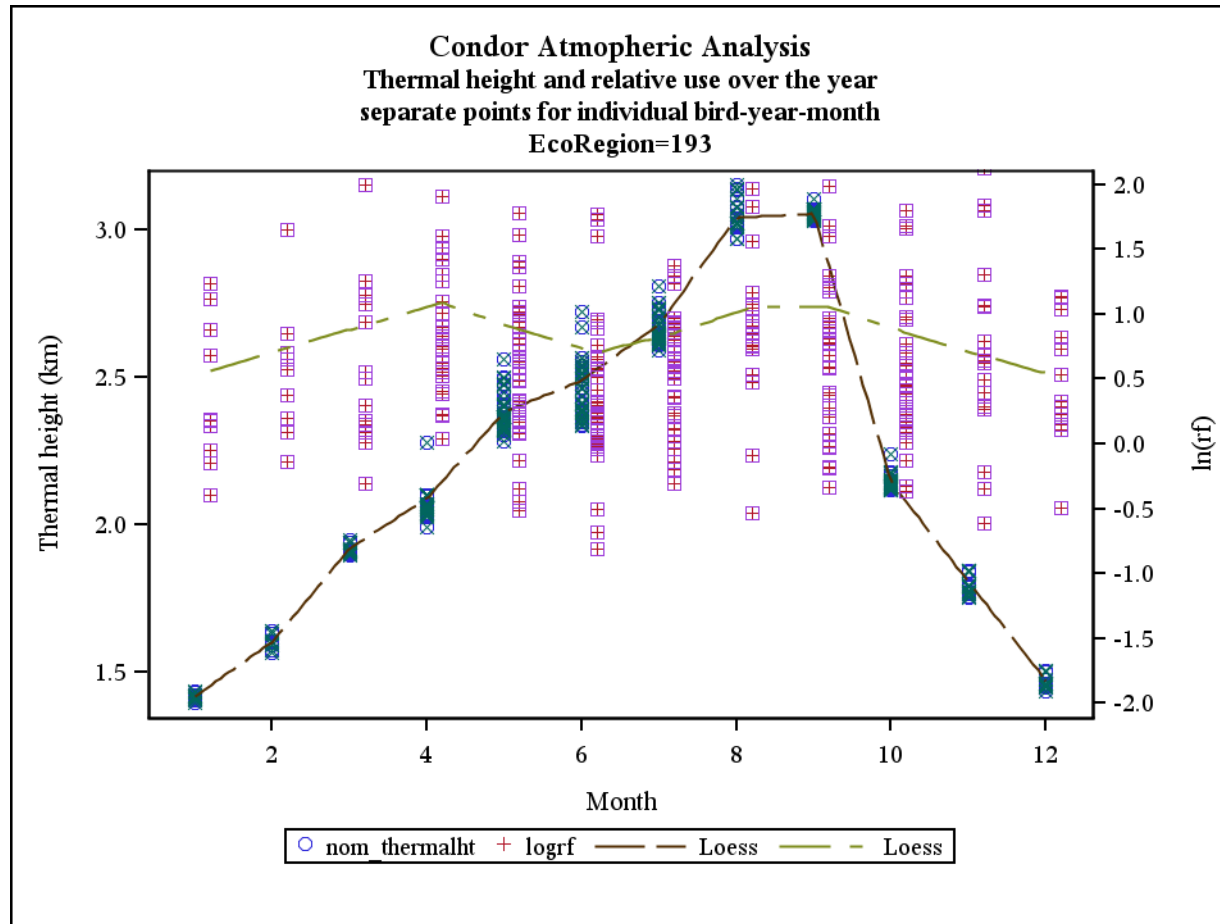

EcoRegion=8

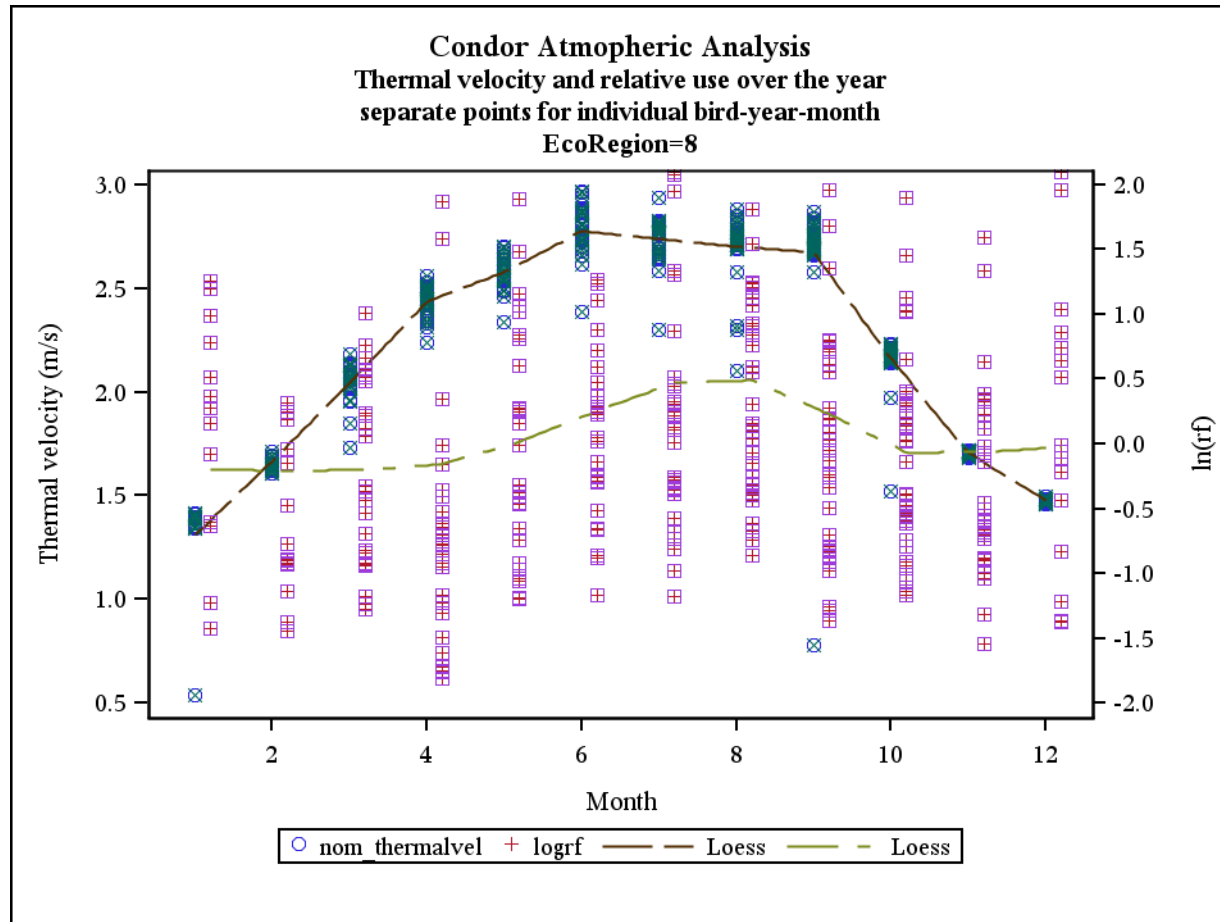

EcoRegion=9

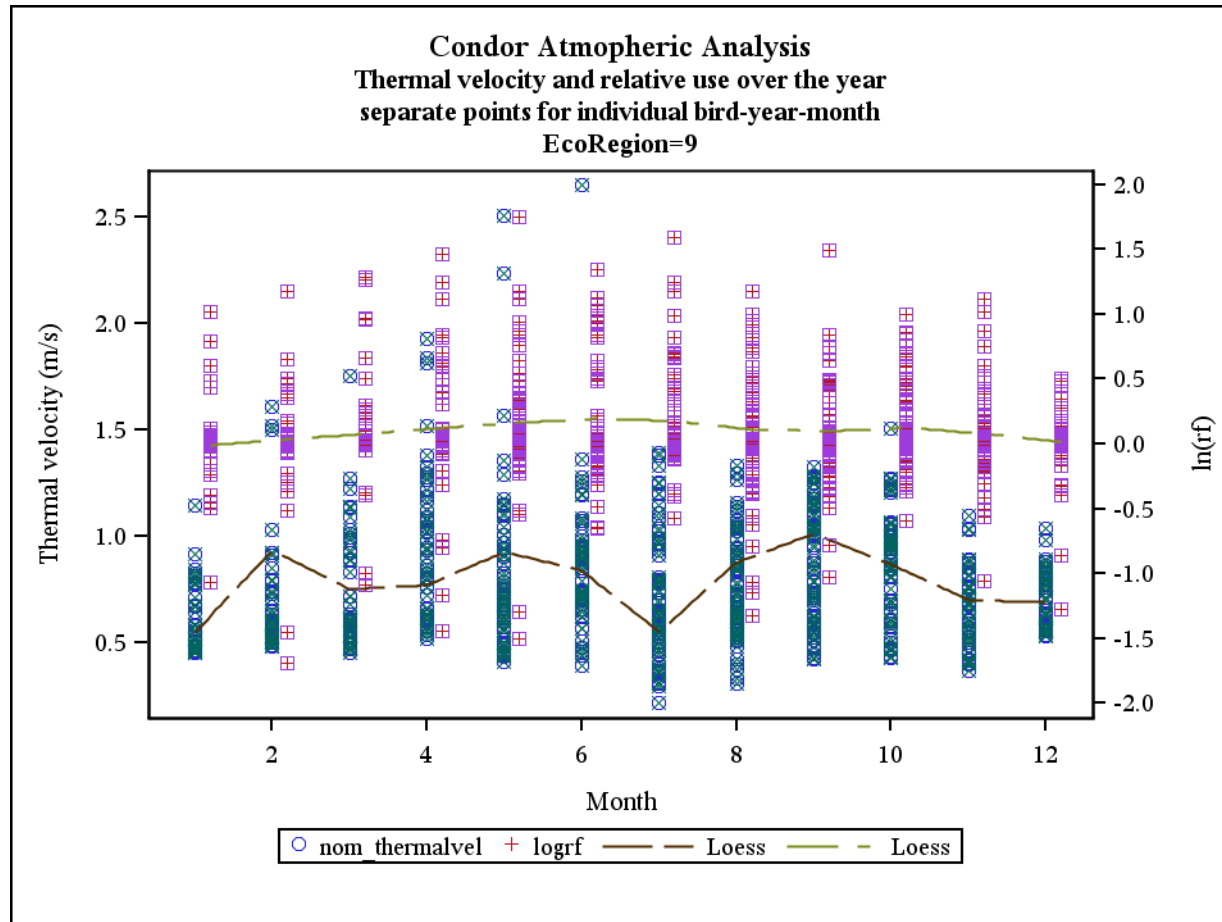

EcoRegion=10

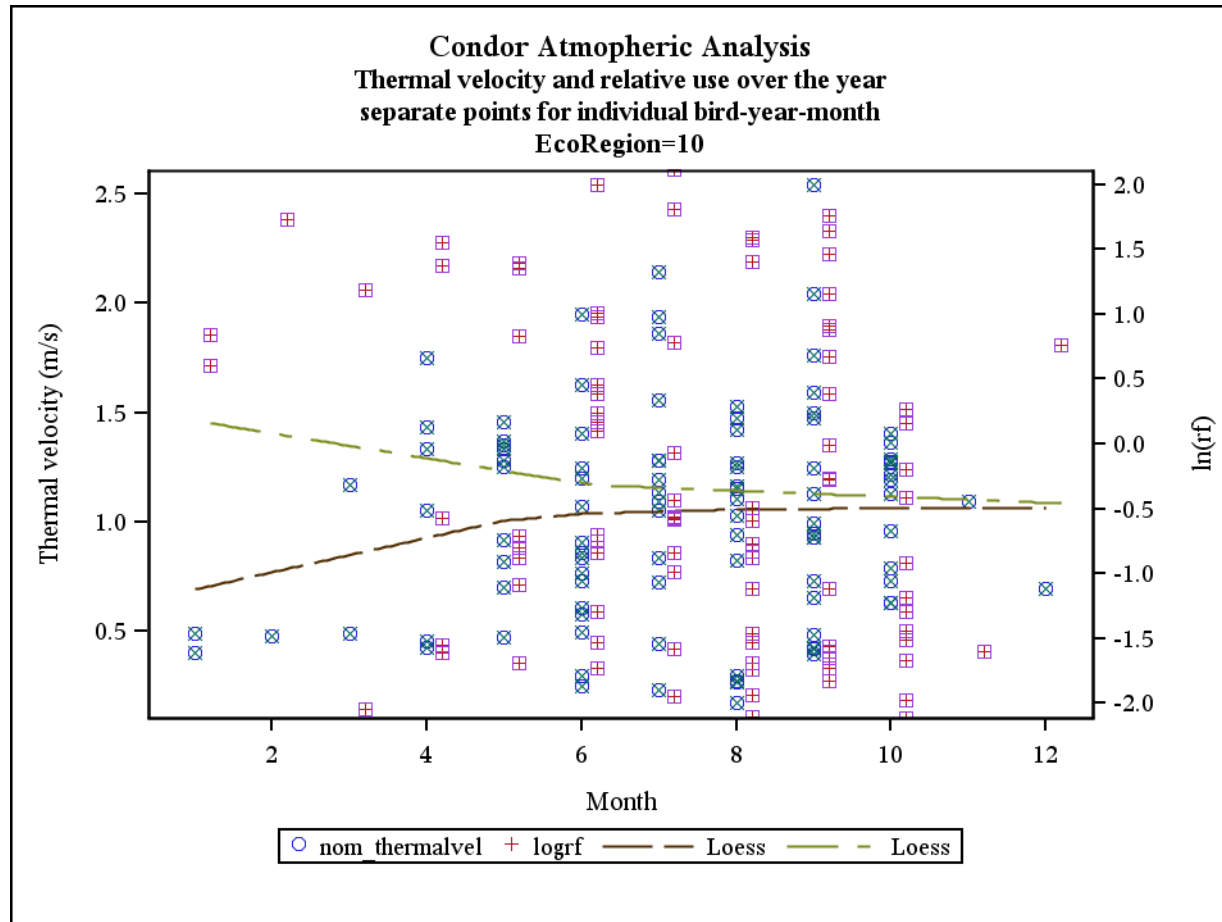

EcoRegion=13

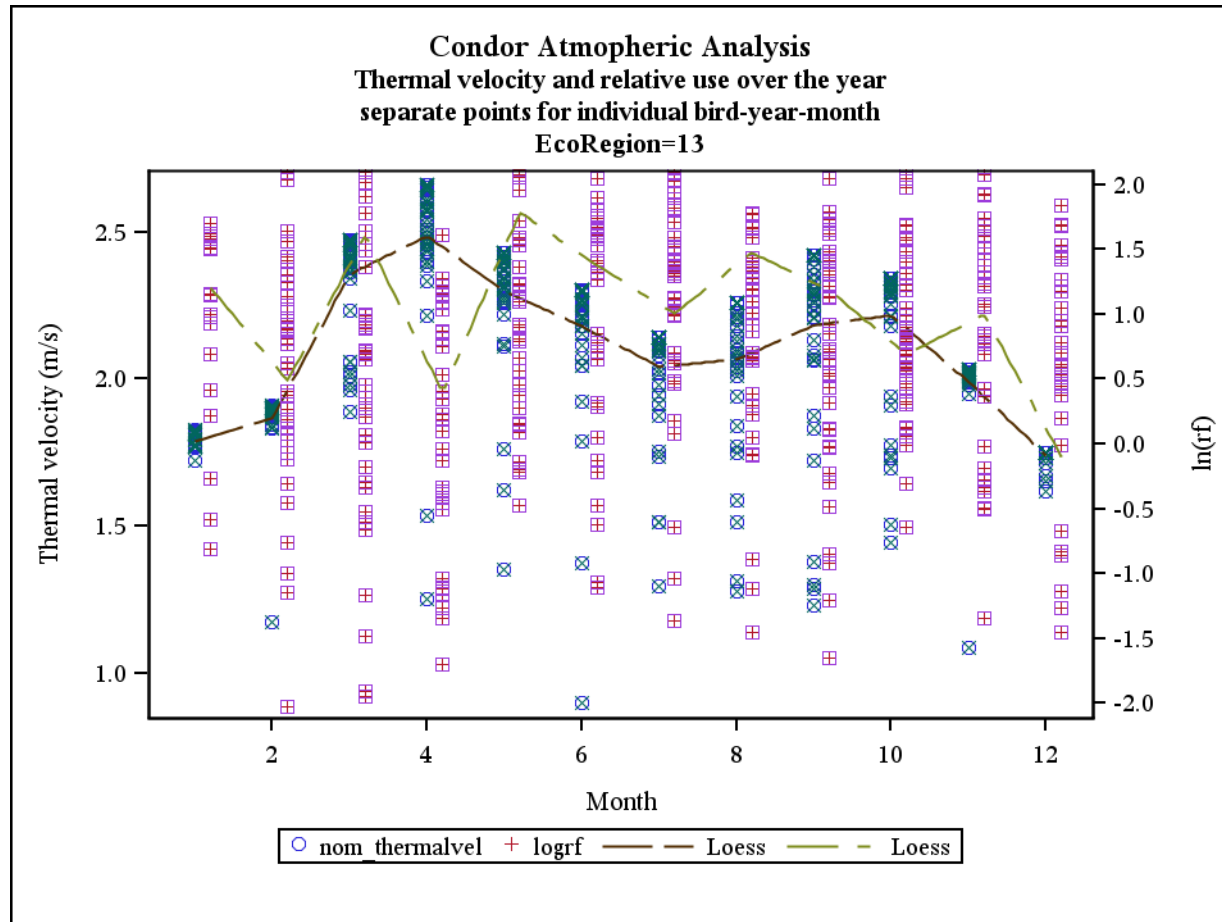

EcoRegion=15

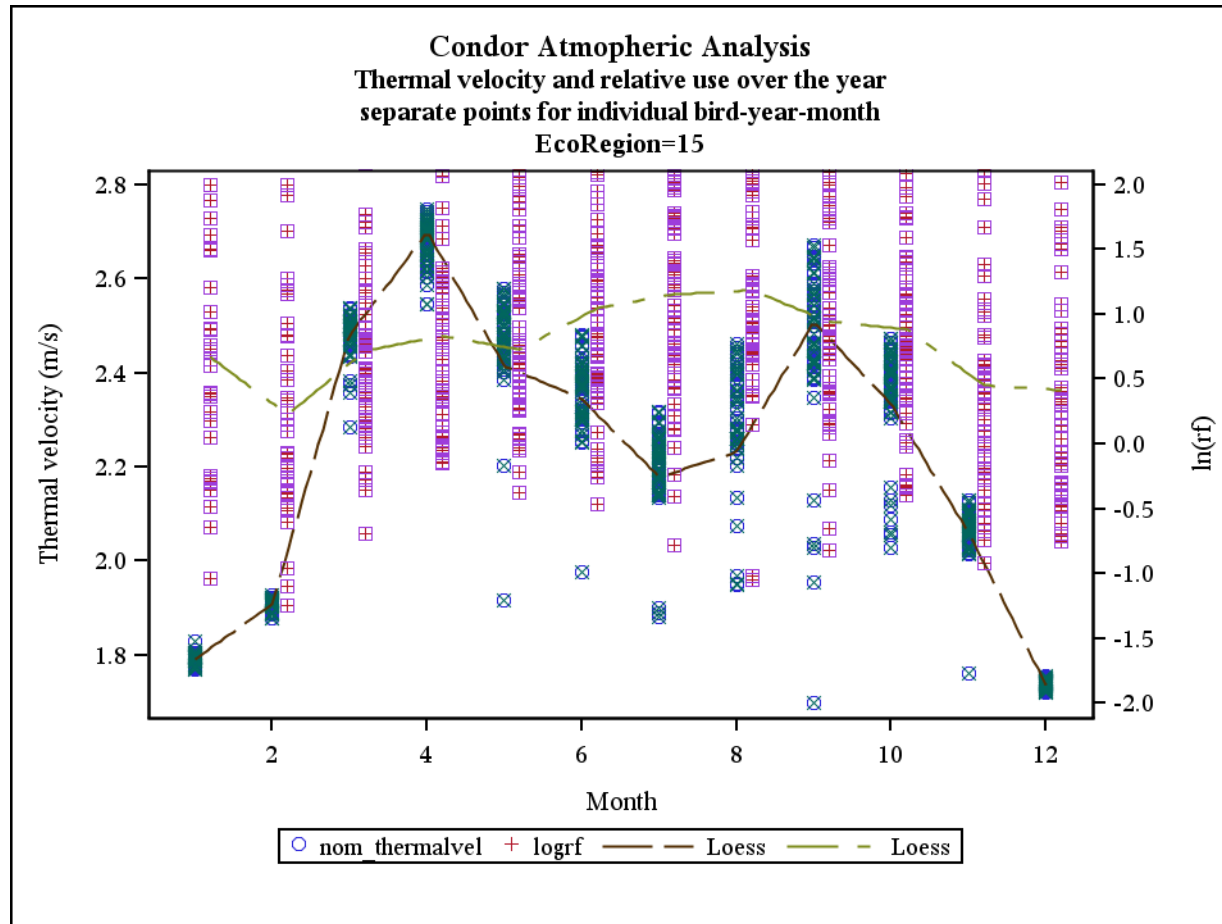

EcoRegion=16

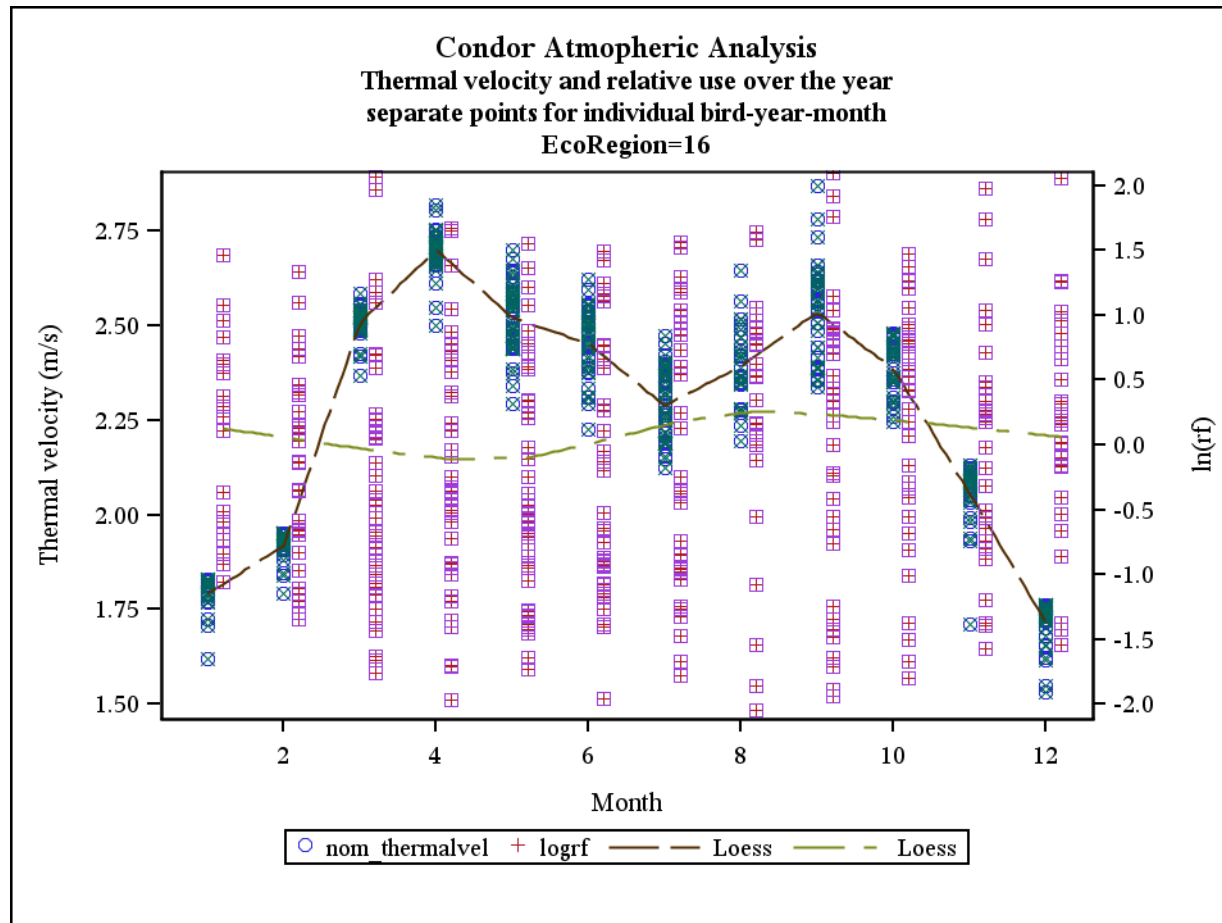

EcoRegion=18

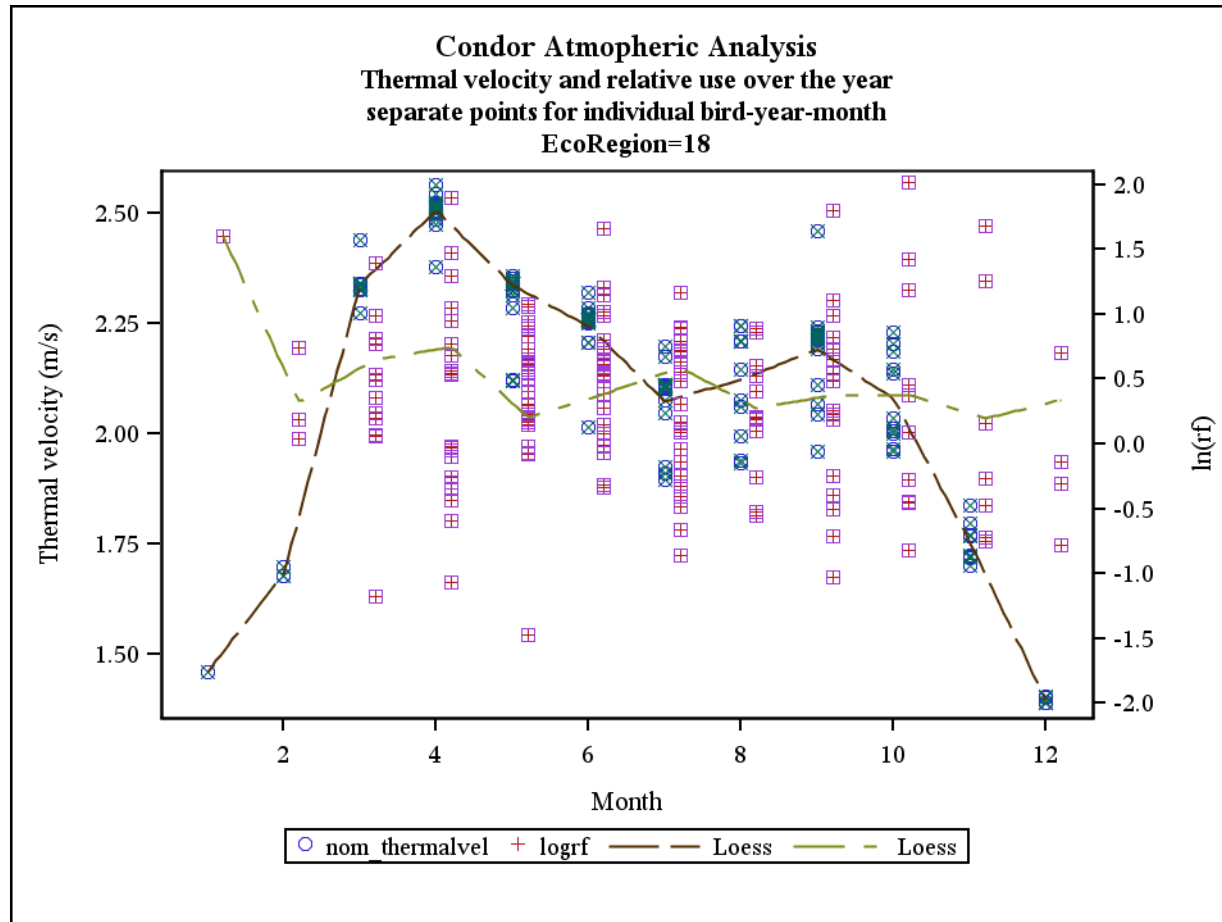

EcoRegion=39

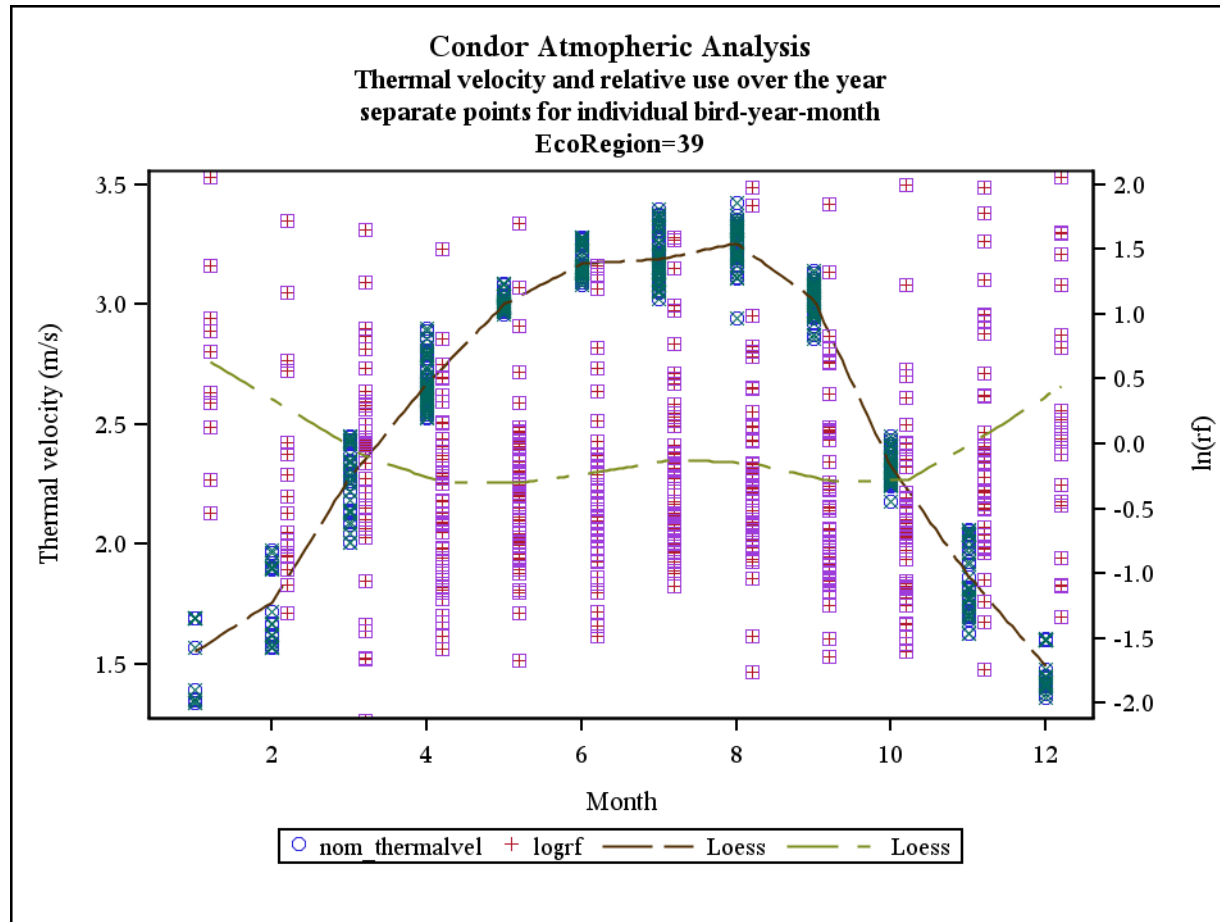

EcoRegion=40

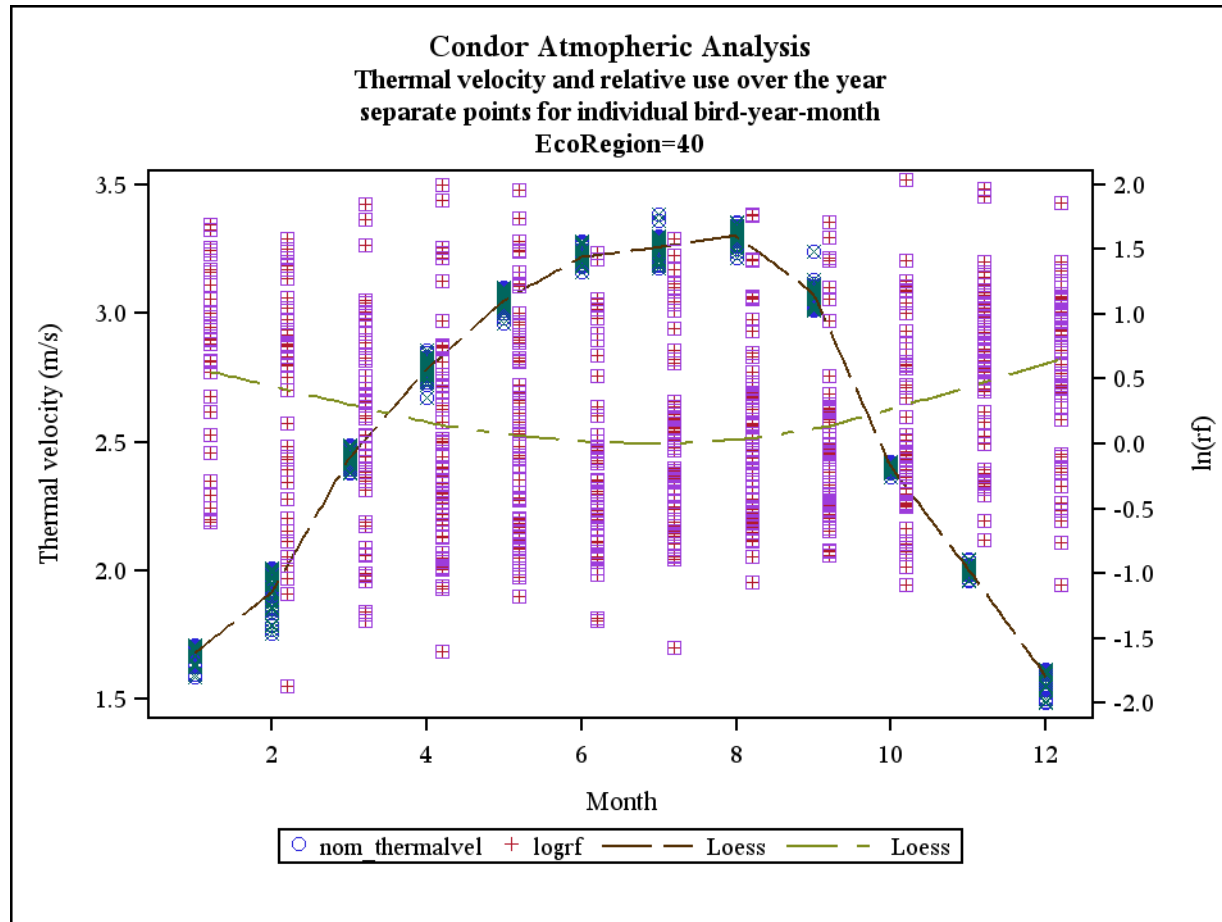

EcoRegion=95

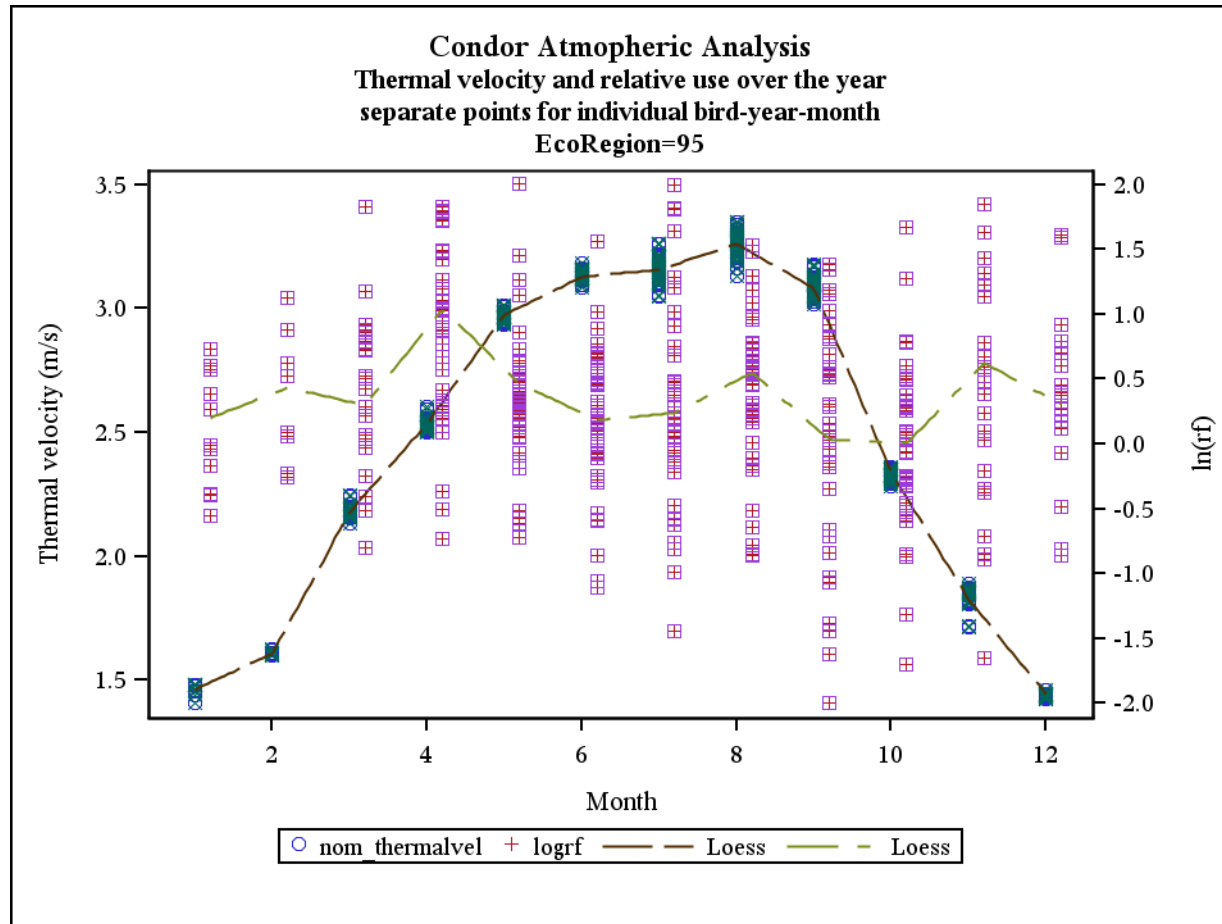

EcoRegion=101

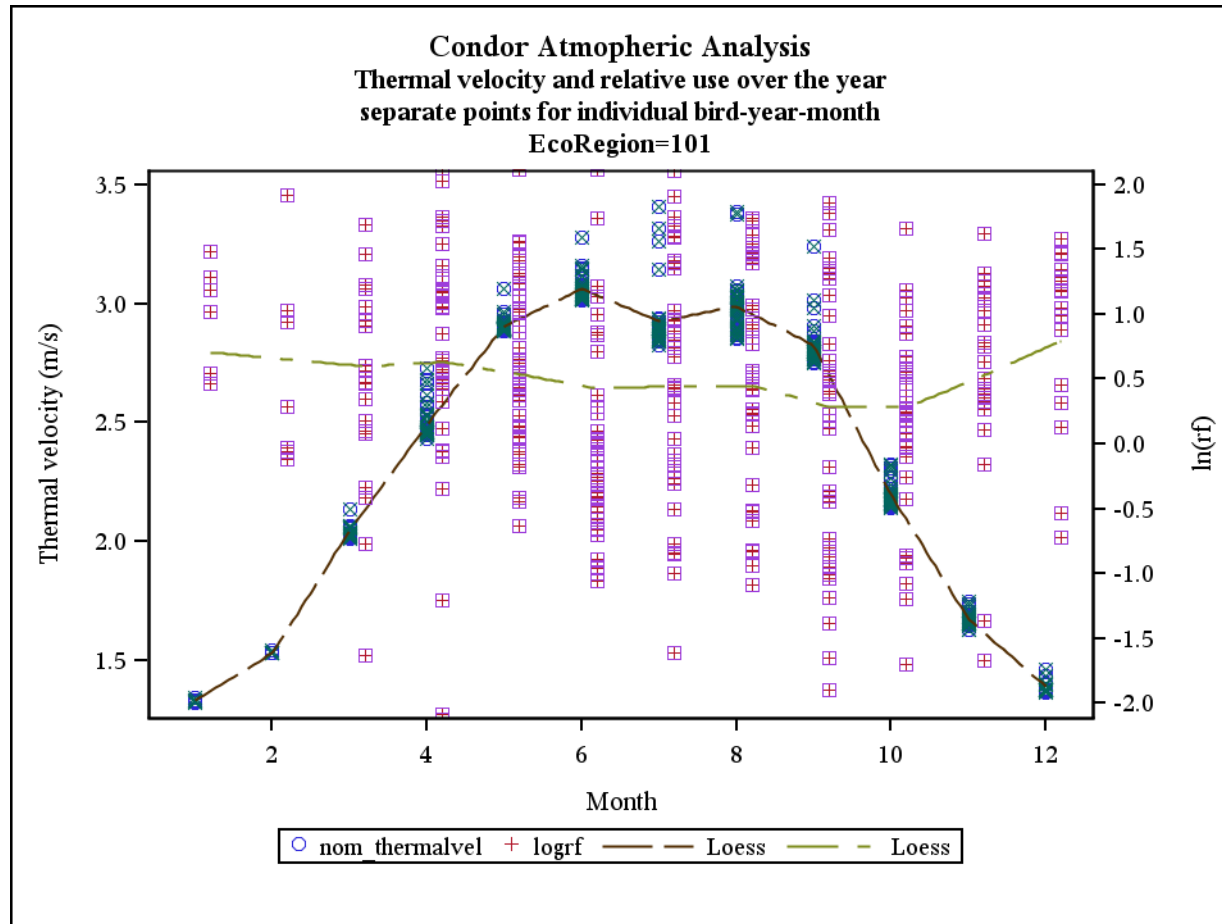

EcoRegion=102

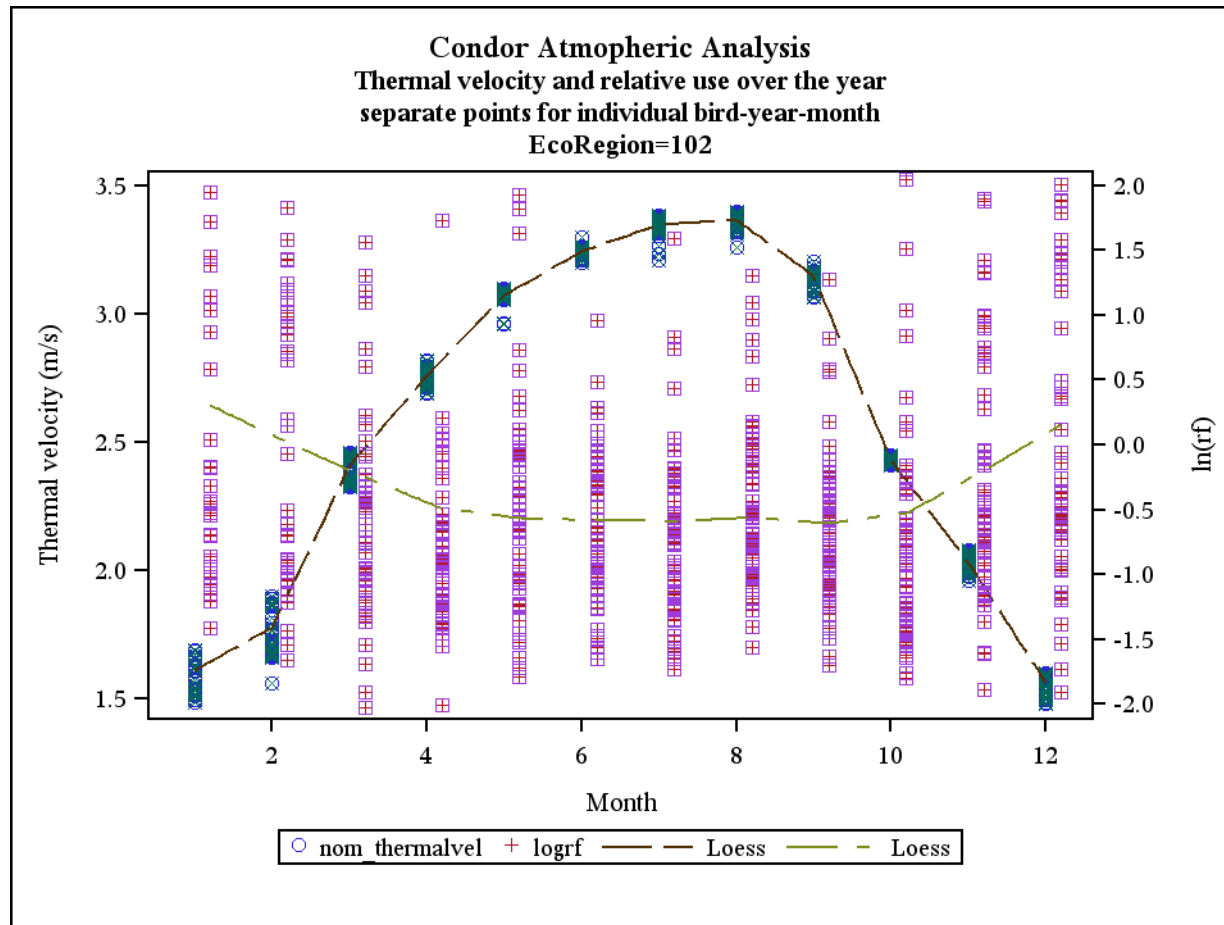

EcoRegion=116

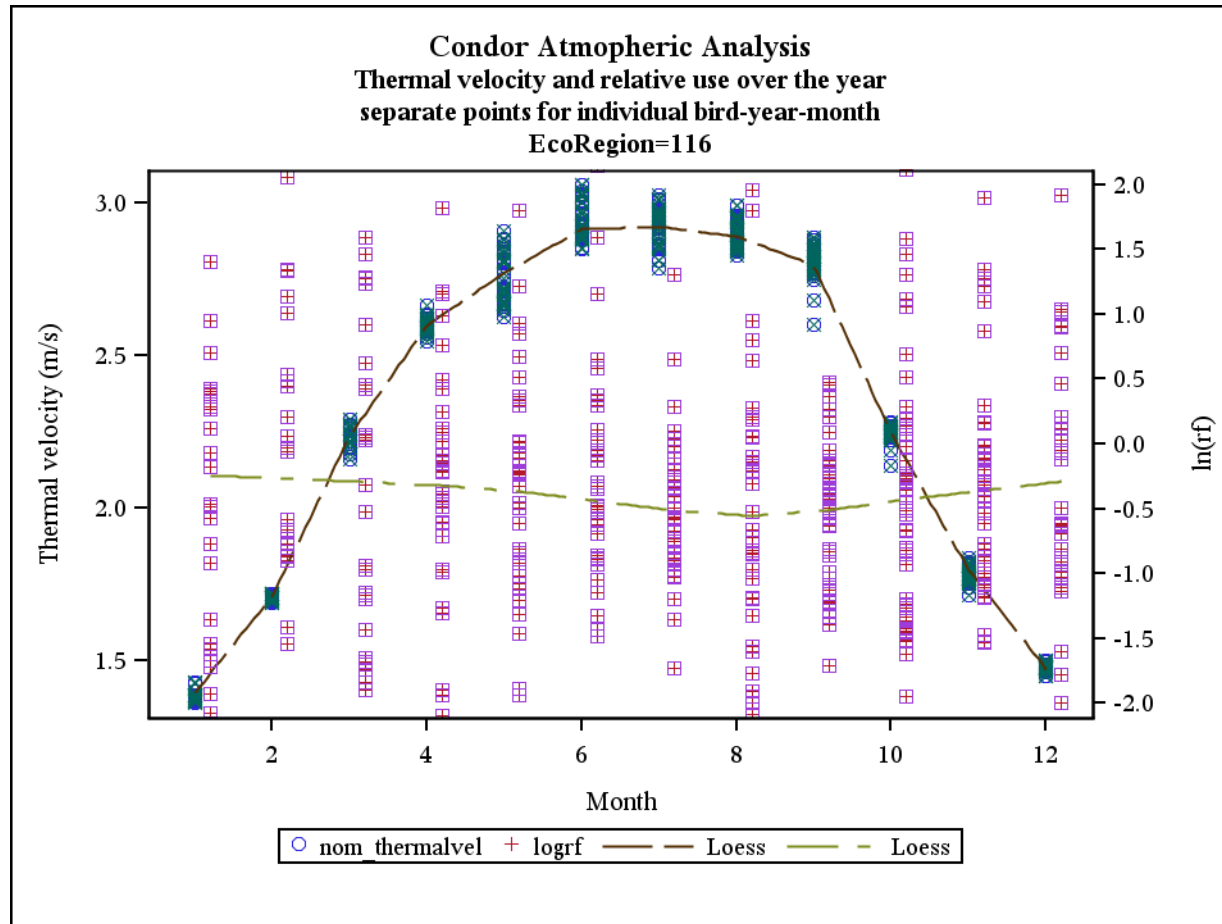

EcoRegion=117

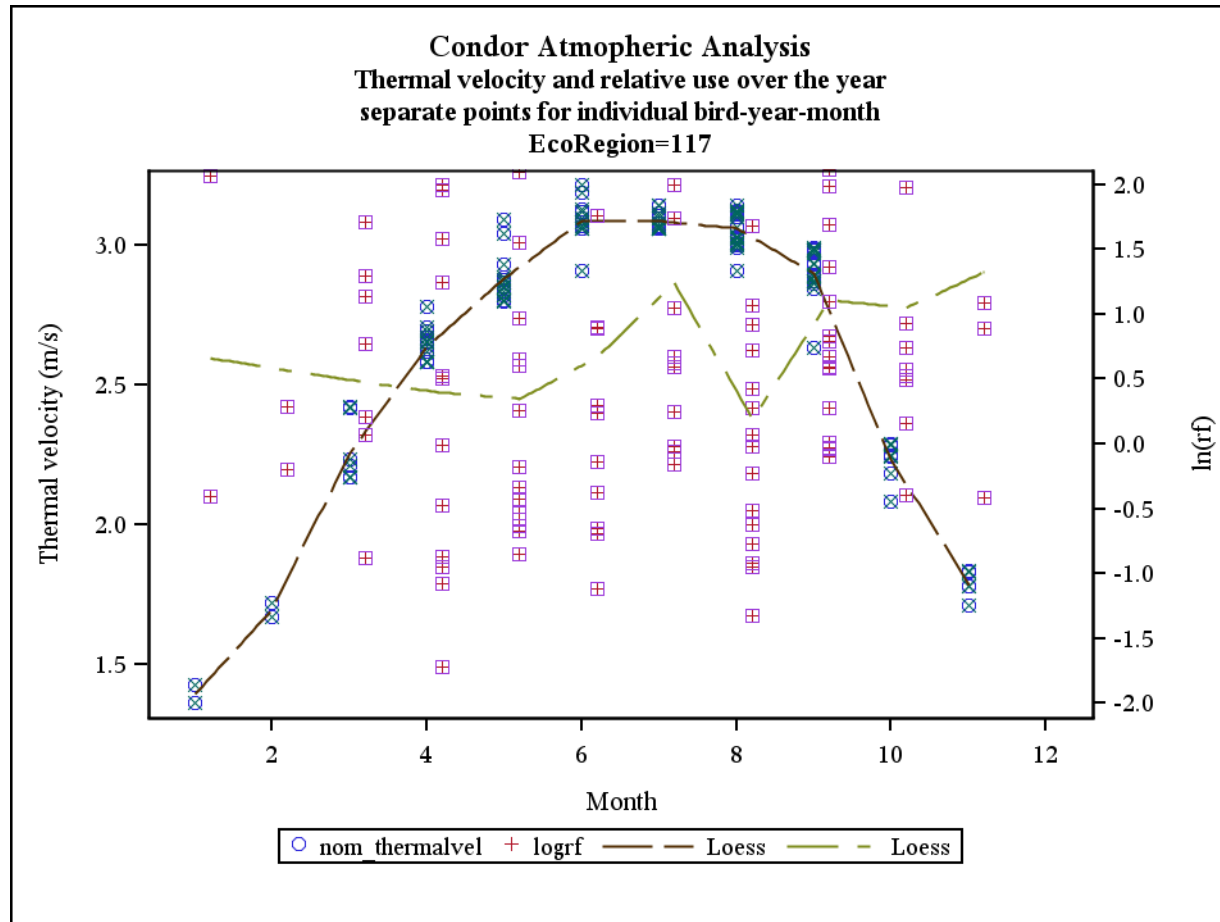

EcoRegion=118

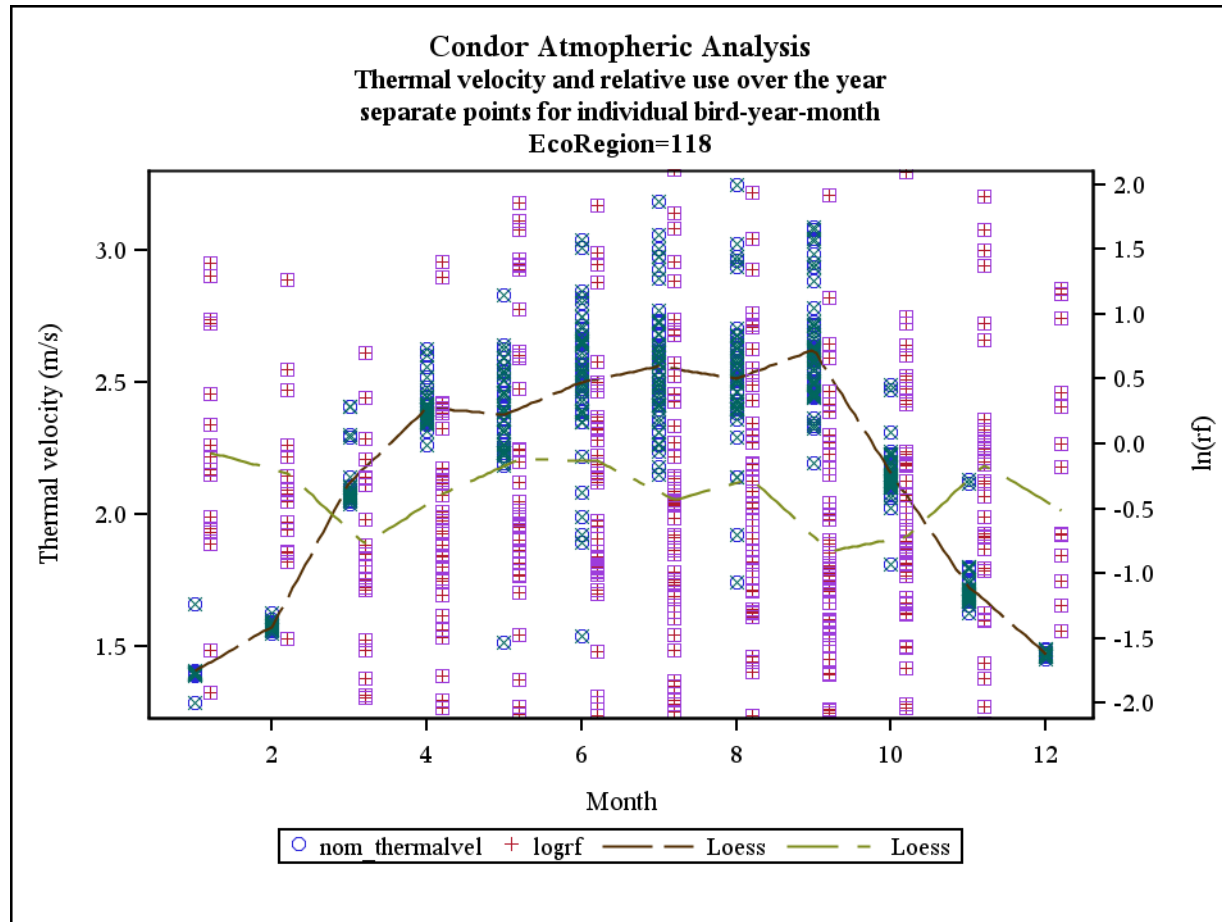

EcoRegion=119

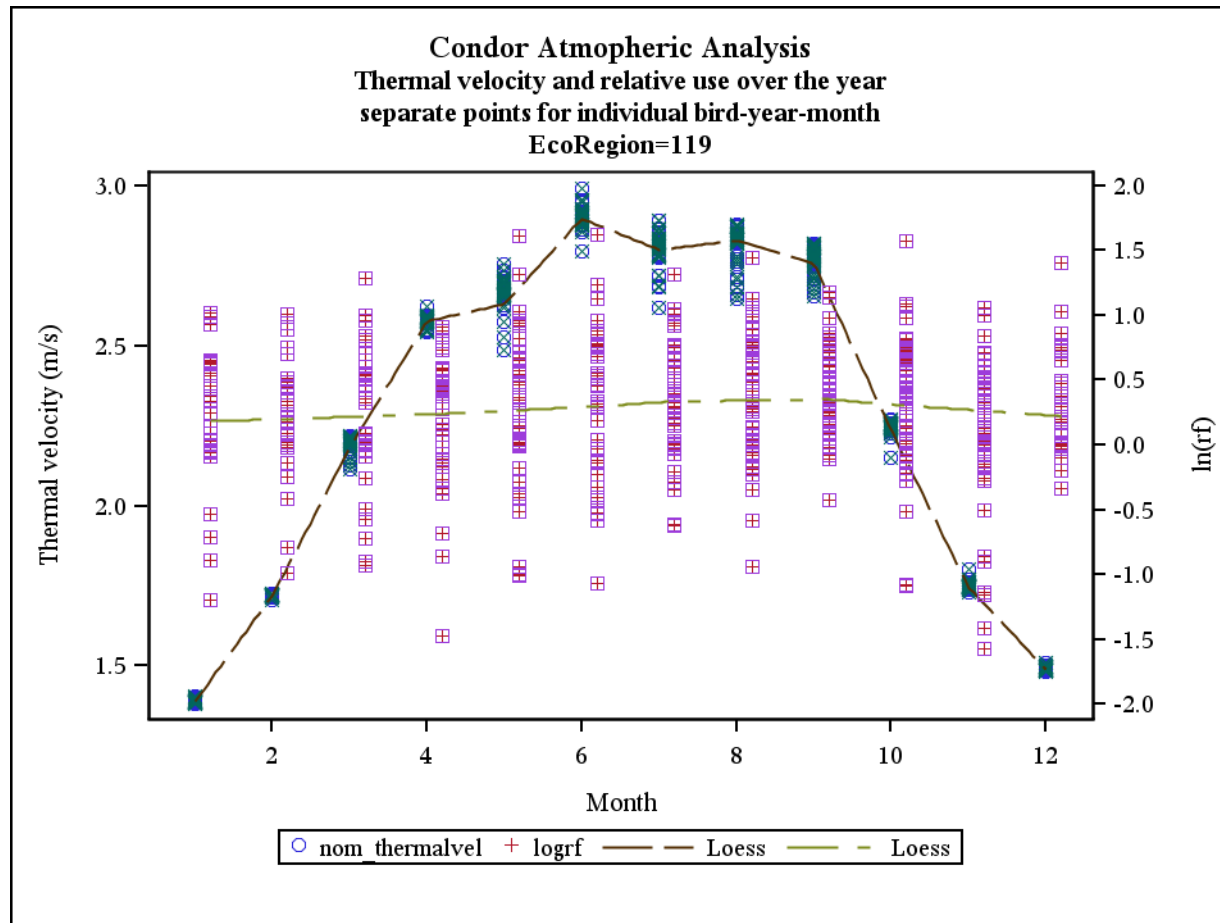

EcoRegion=123

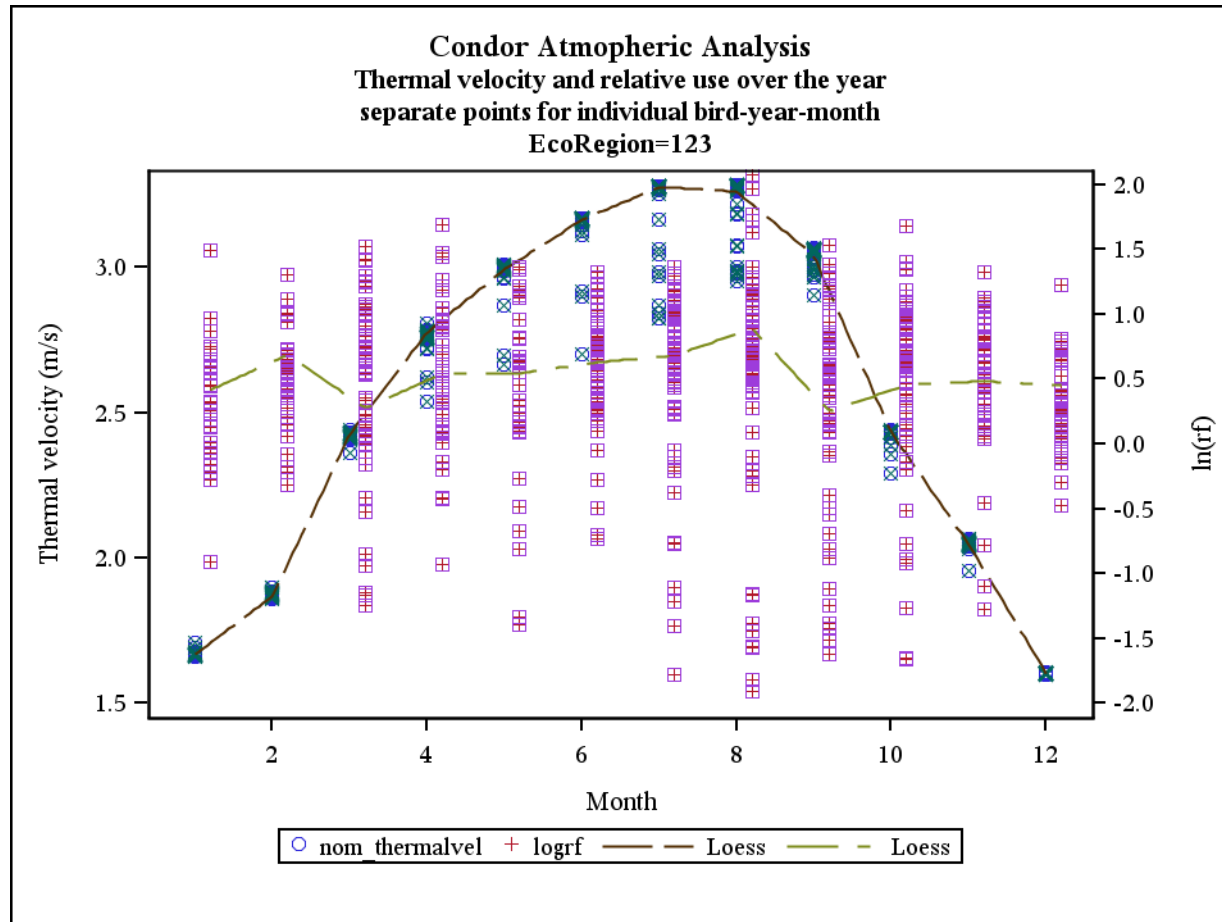

EcoRegion=124

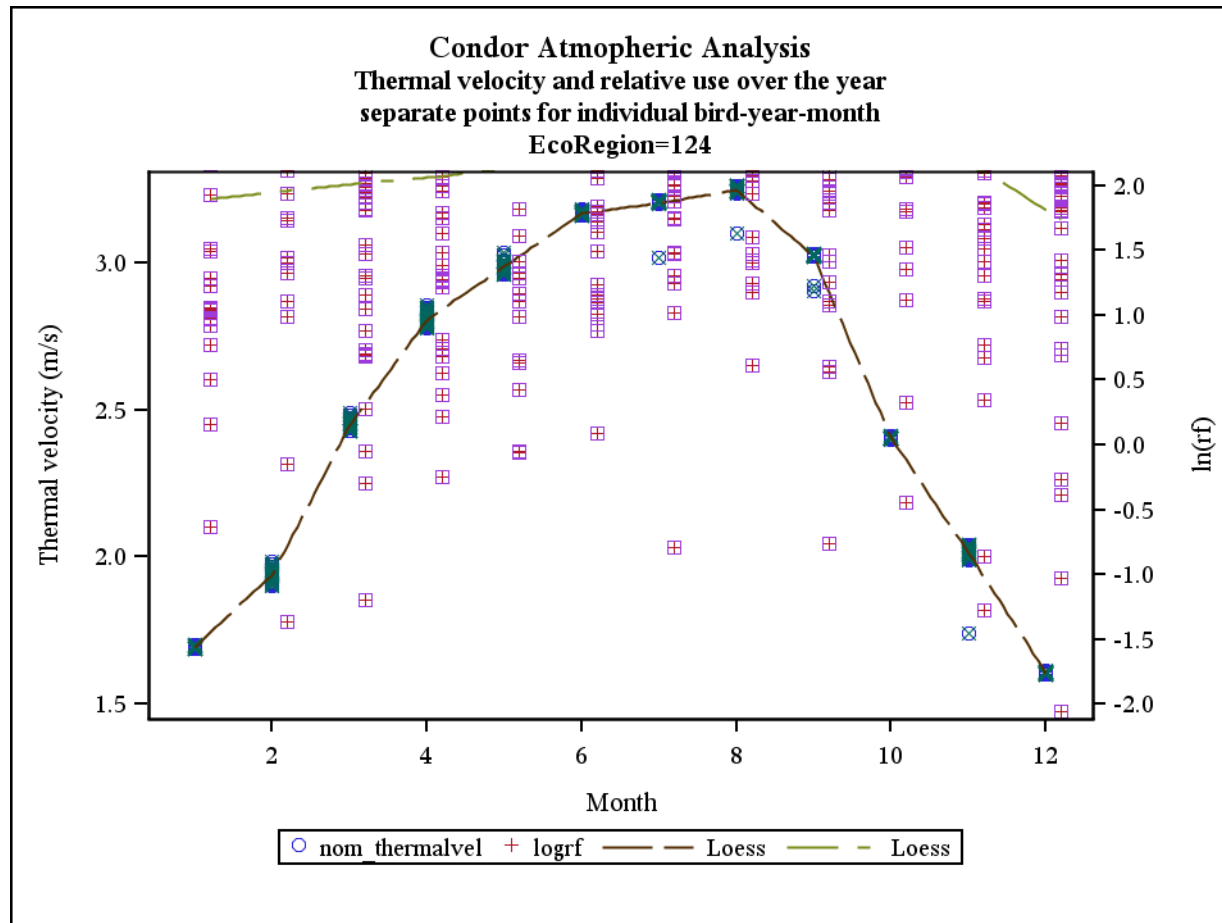

EcoRegion=125

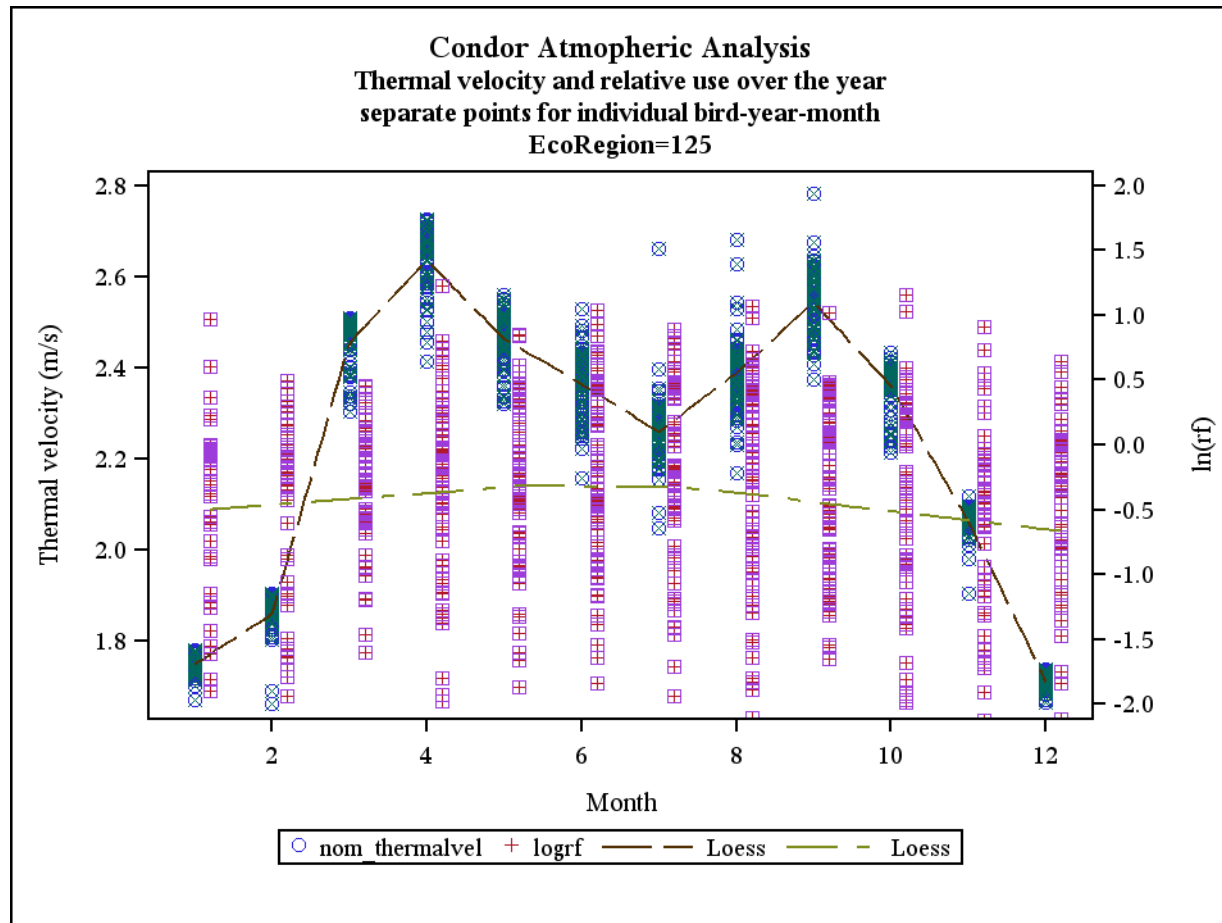

EcoRegion=126

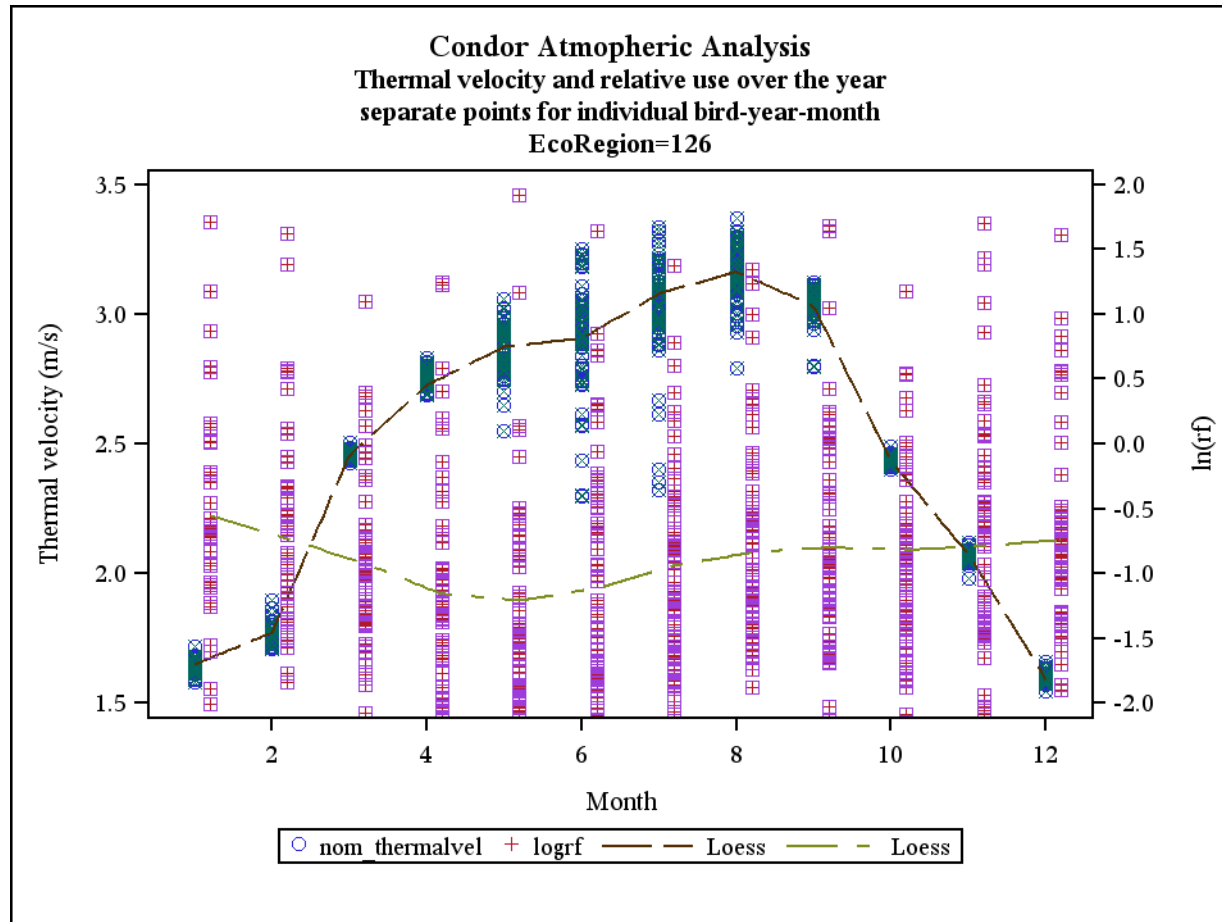

EcoRegion=127

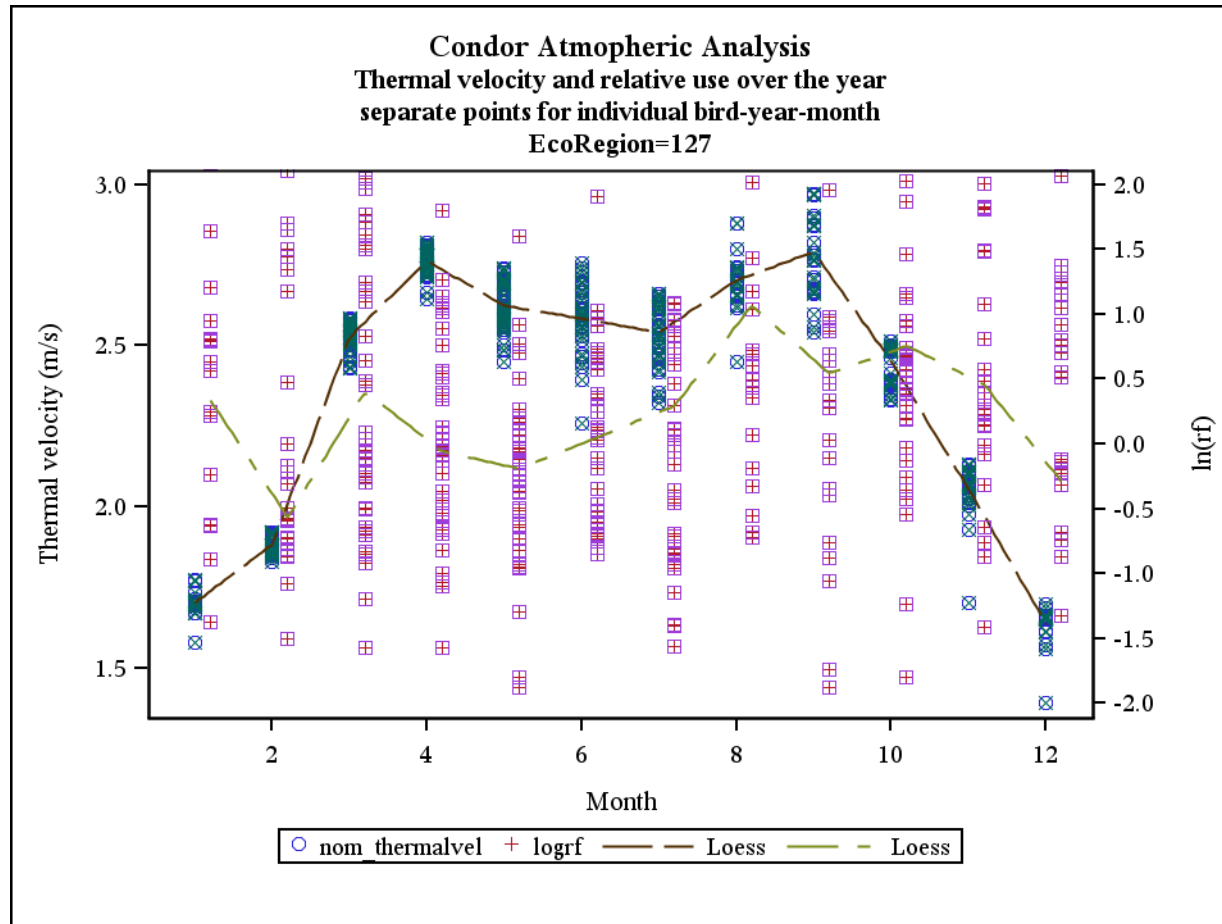

EcoRegion=128

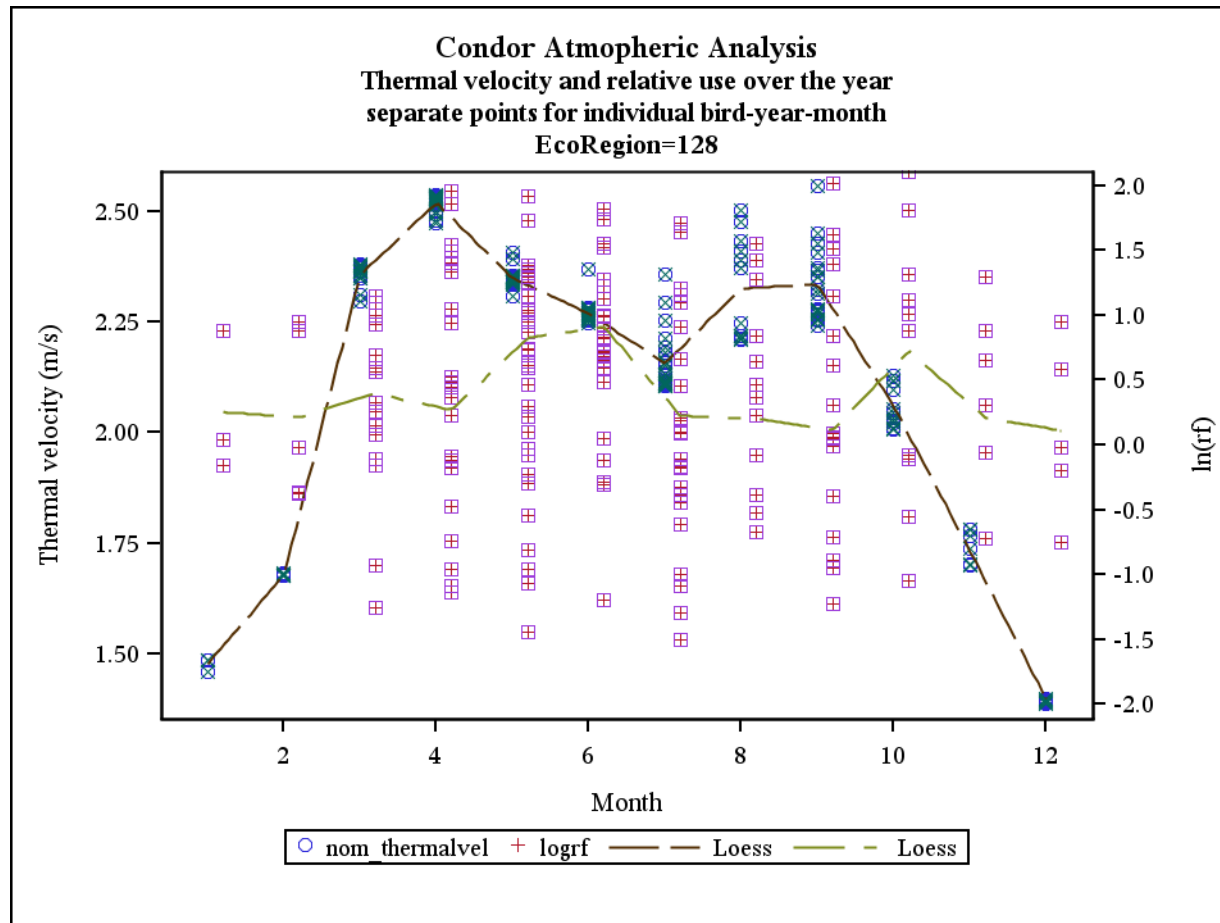

EcoRegion=147

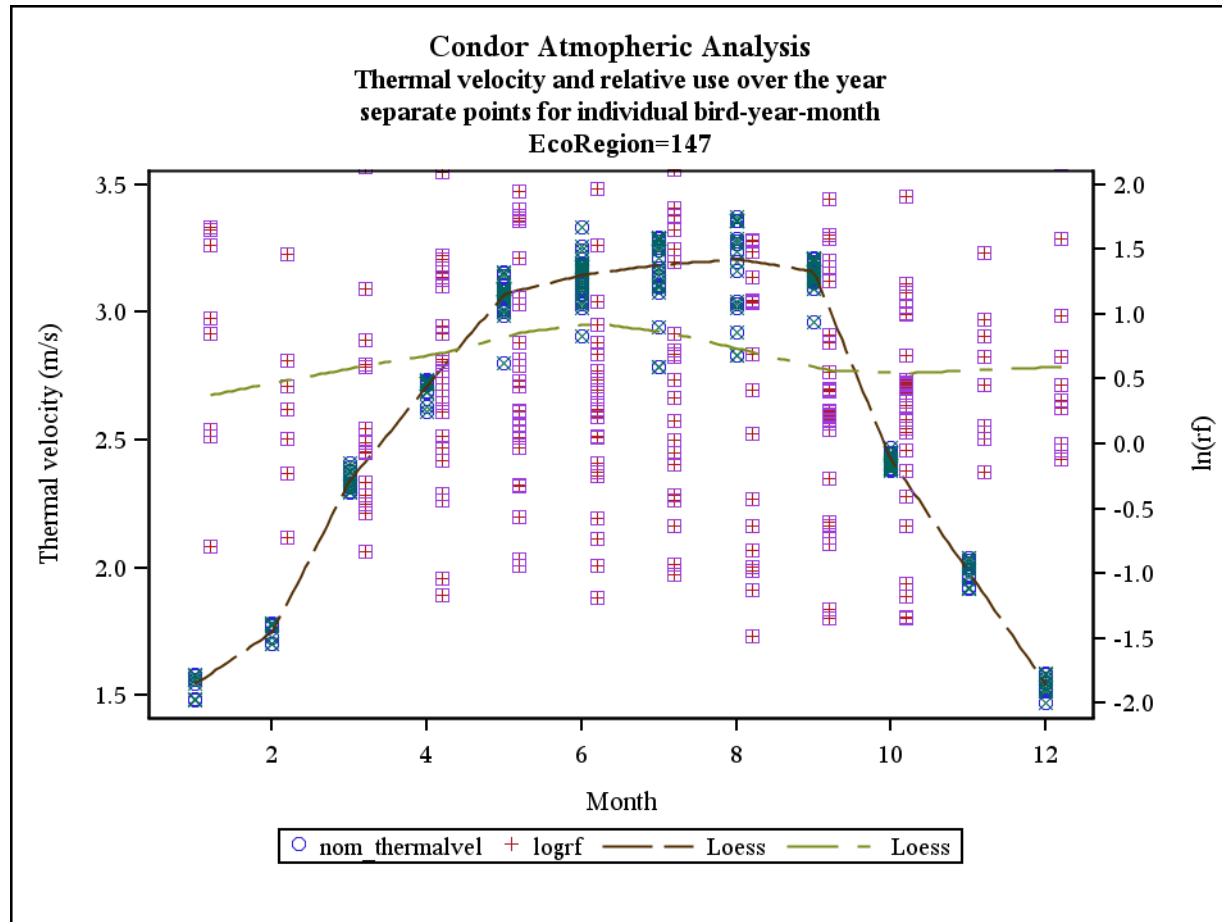

EcoRegion=192

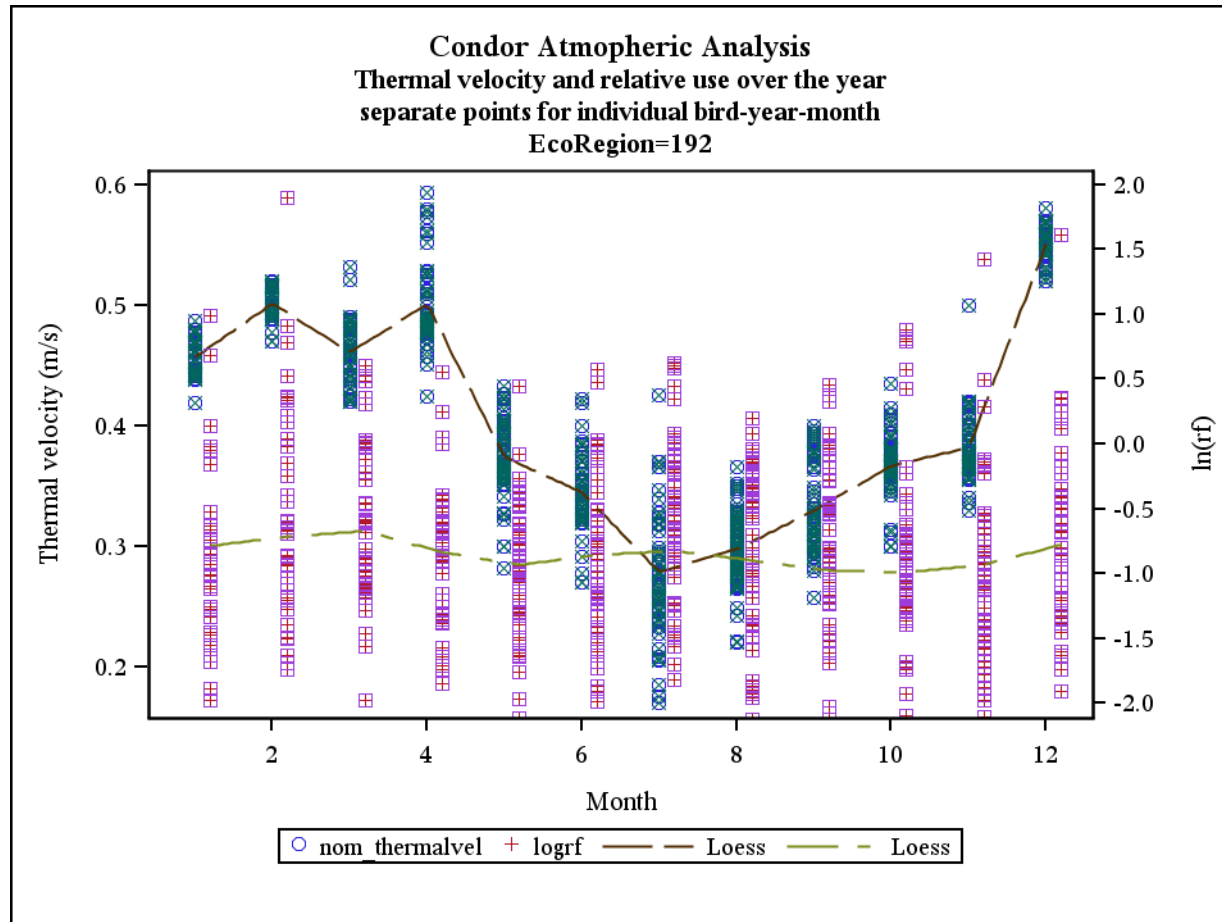

EcoRegion=193

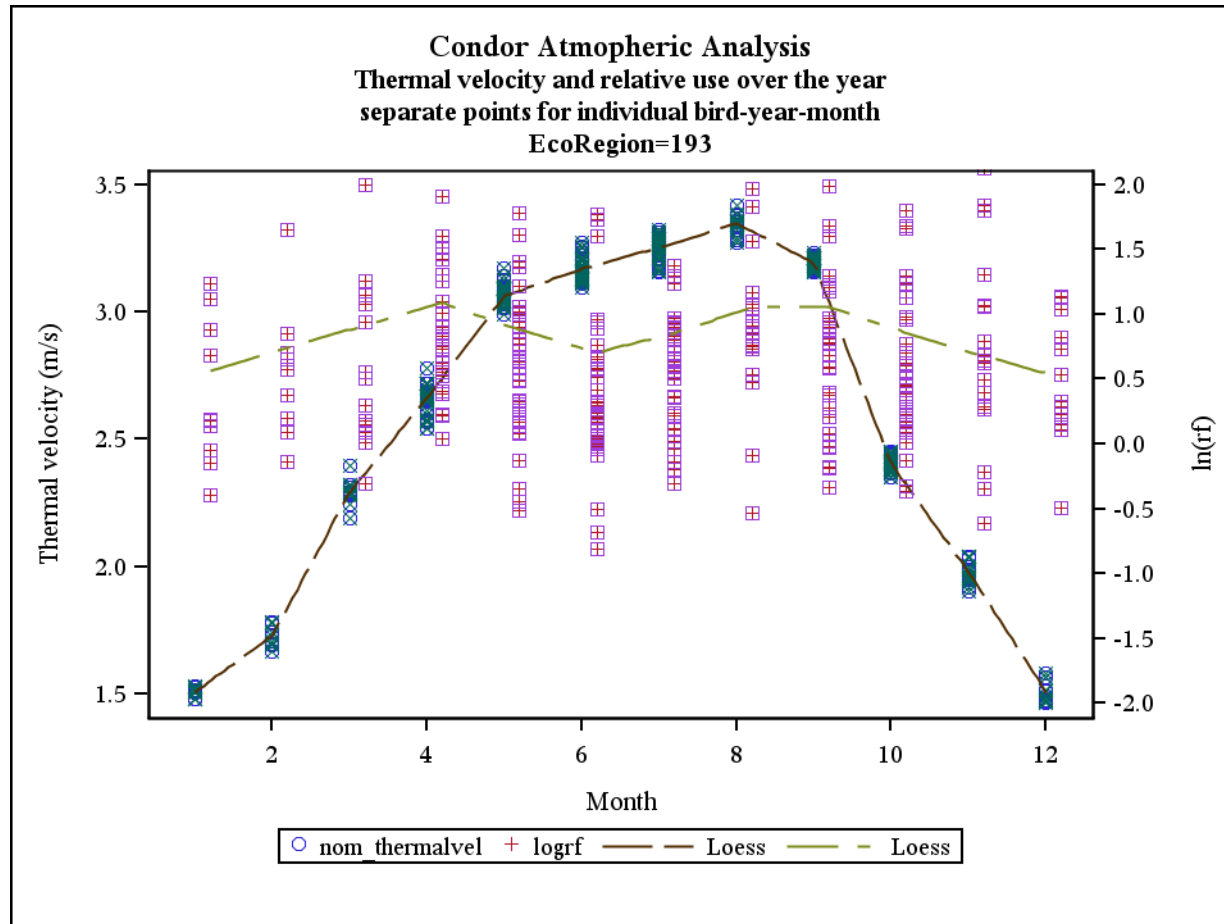

EcoRegion=8

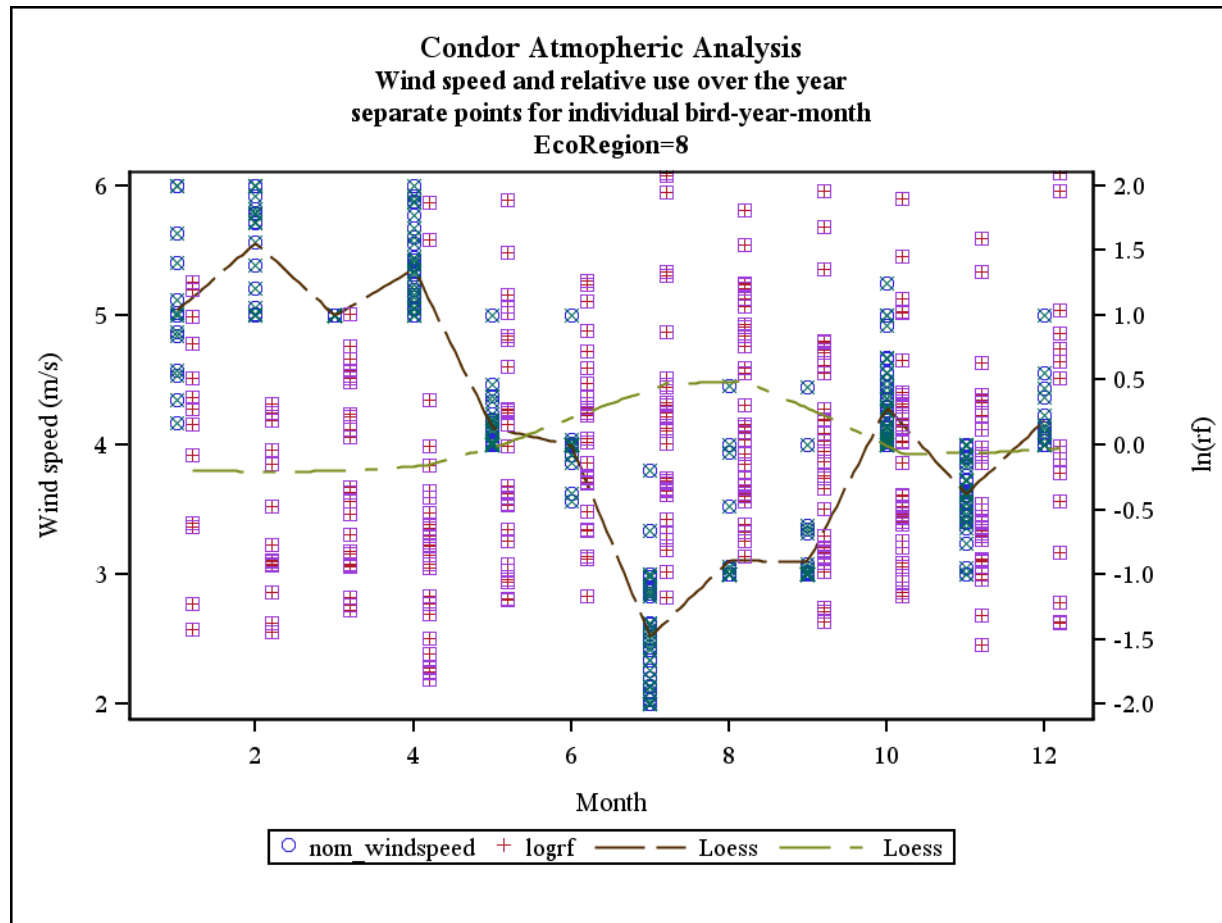

EcoRegion=9

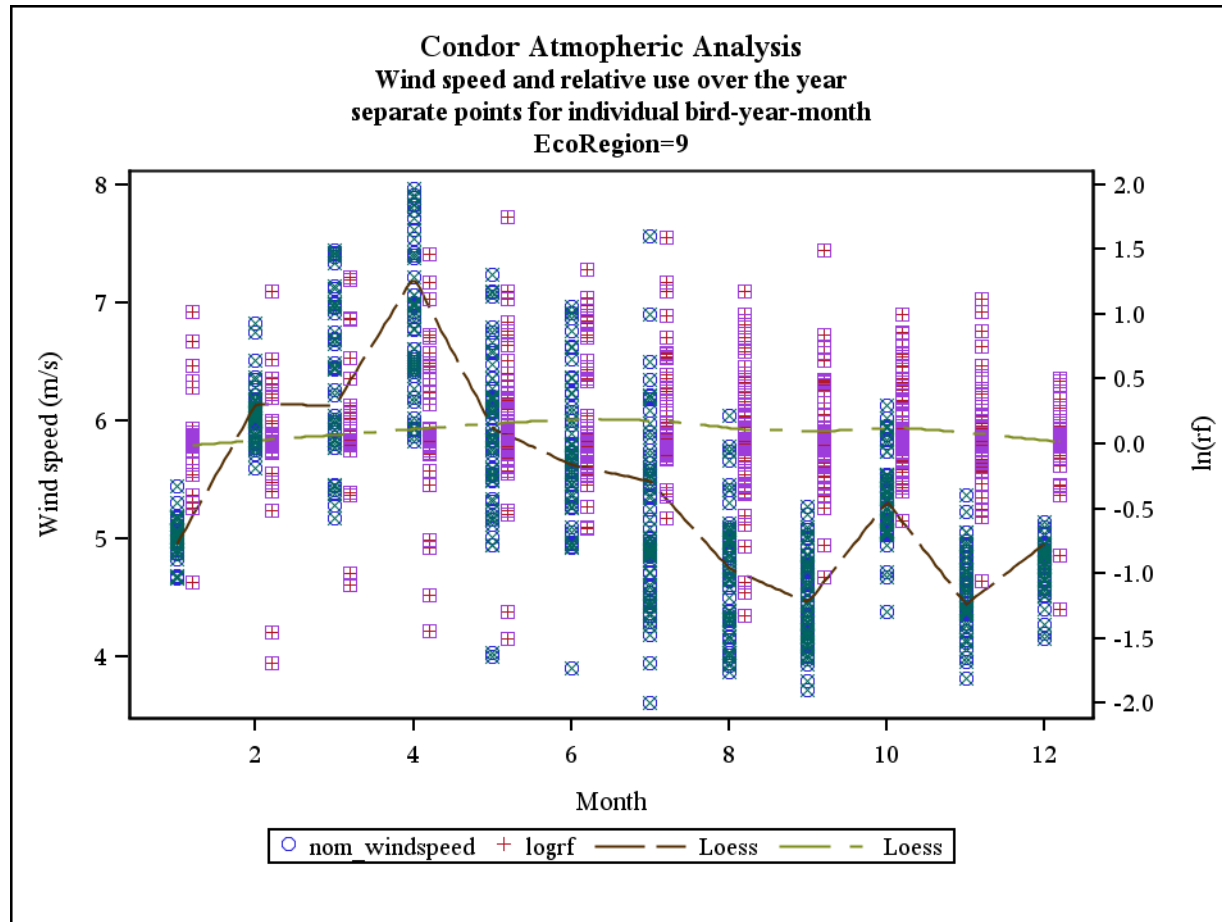

EcoRegion=10

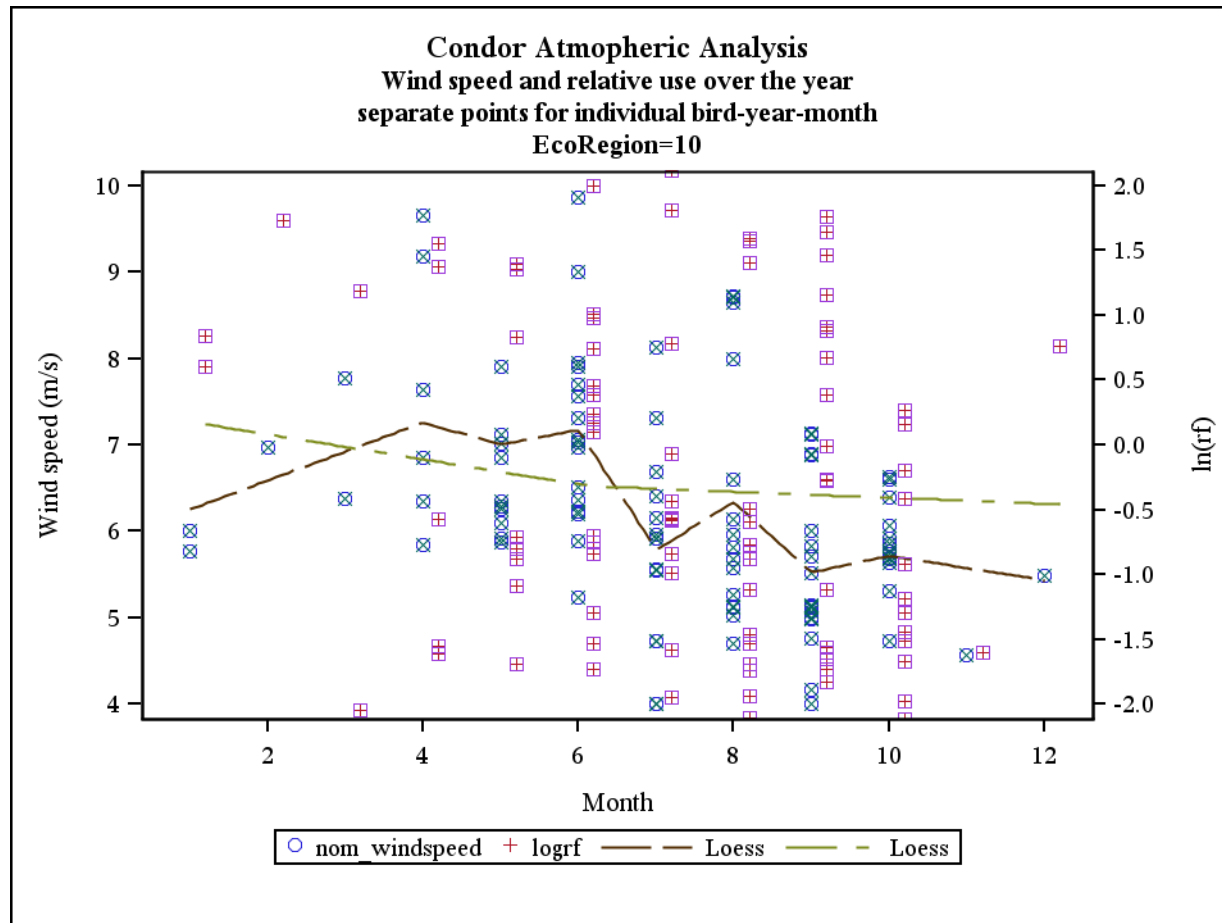

EcoRegion=13

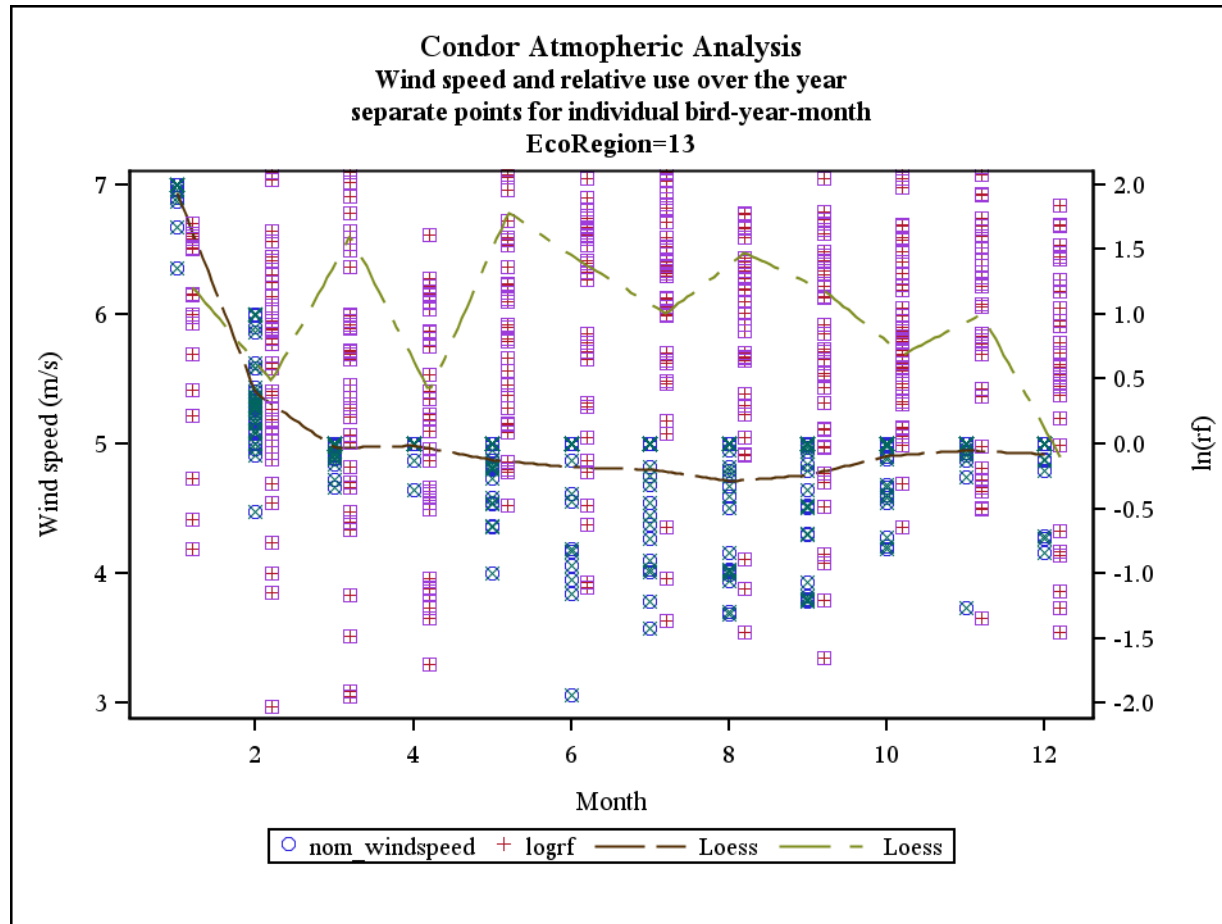

EcoRegion=15

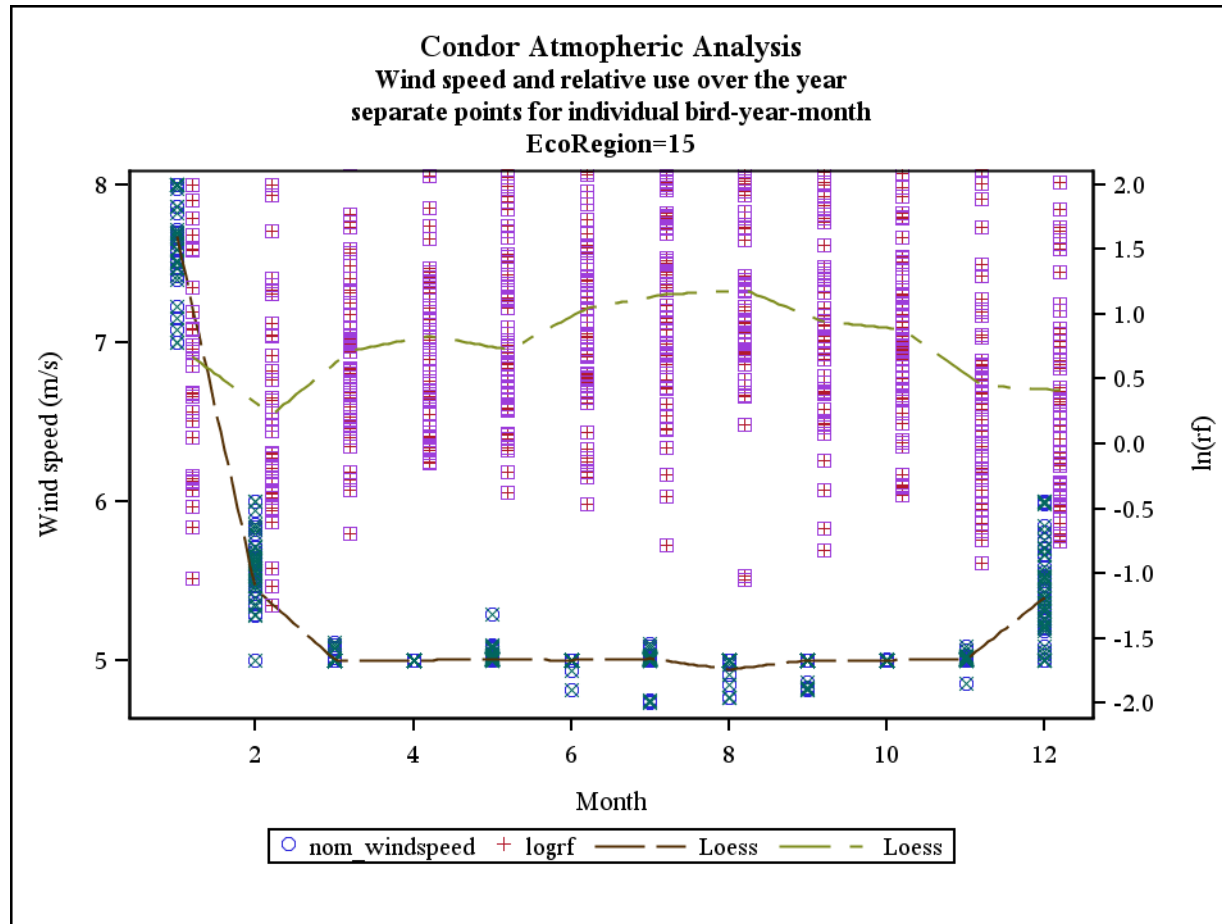

EcoRegion=16

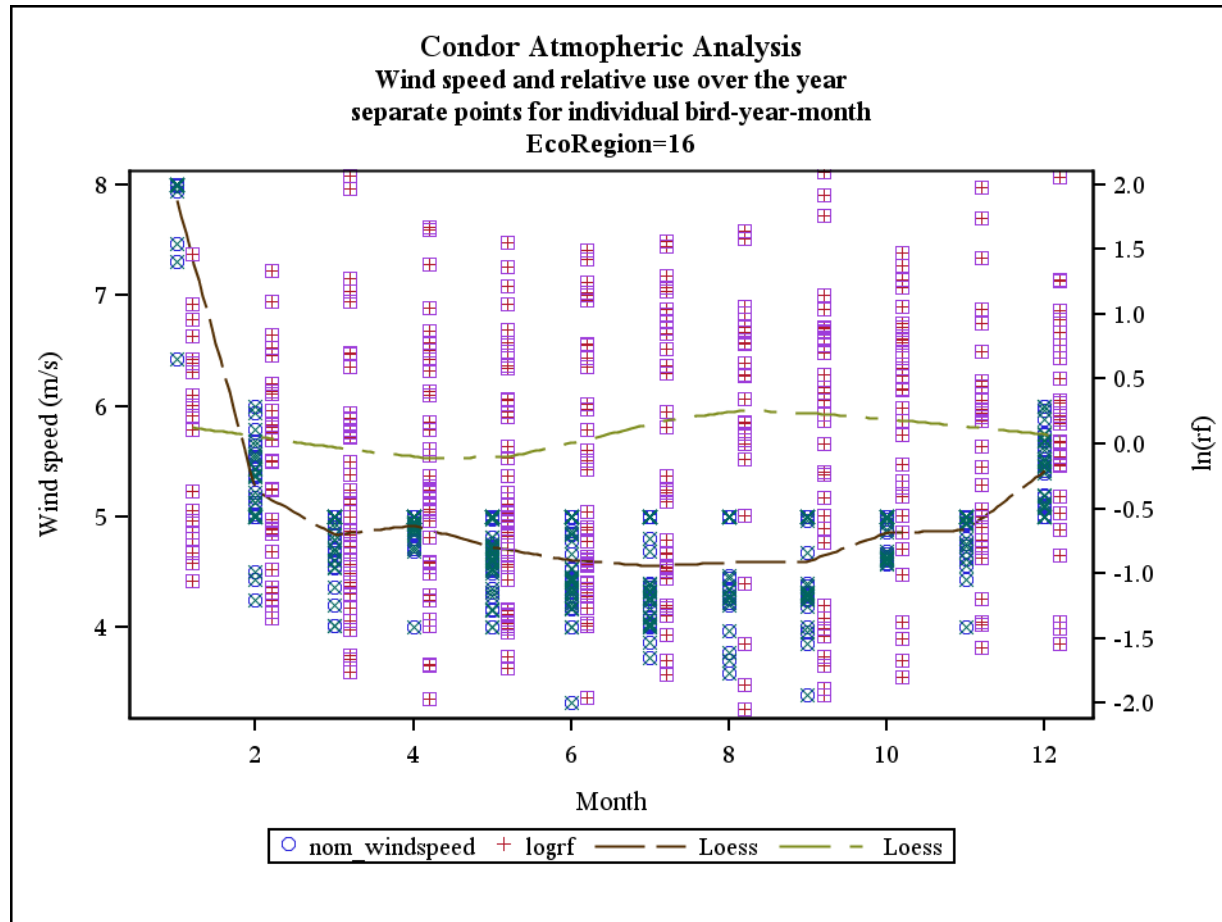

EcoRegion=18

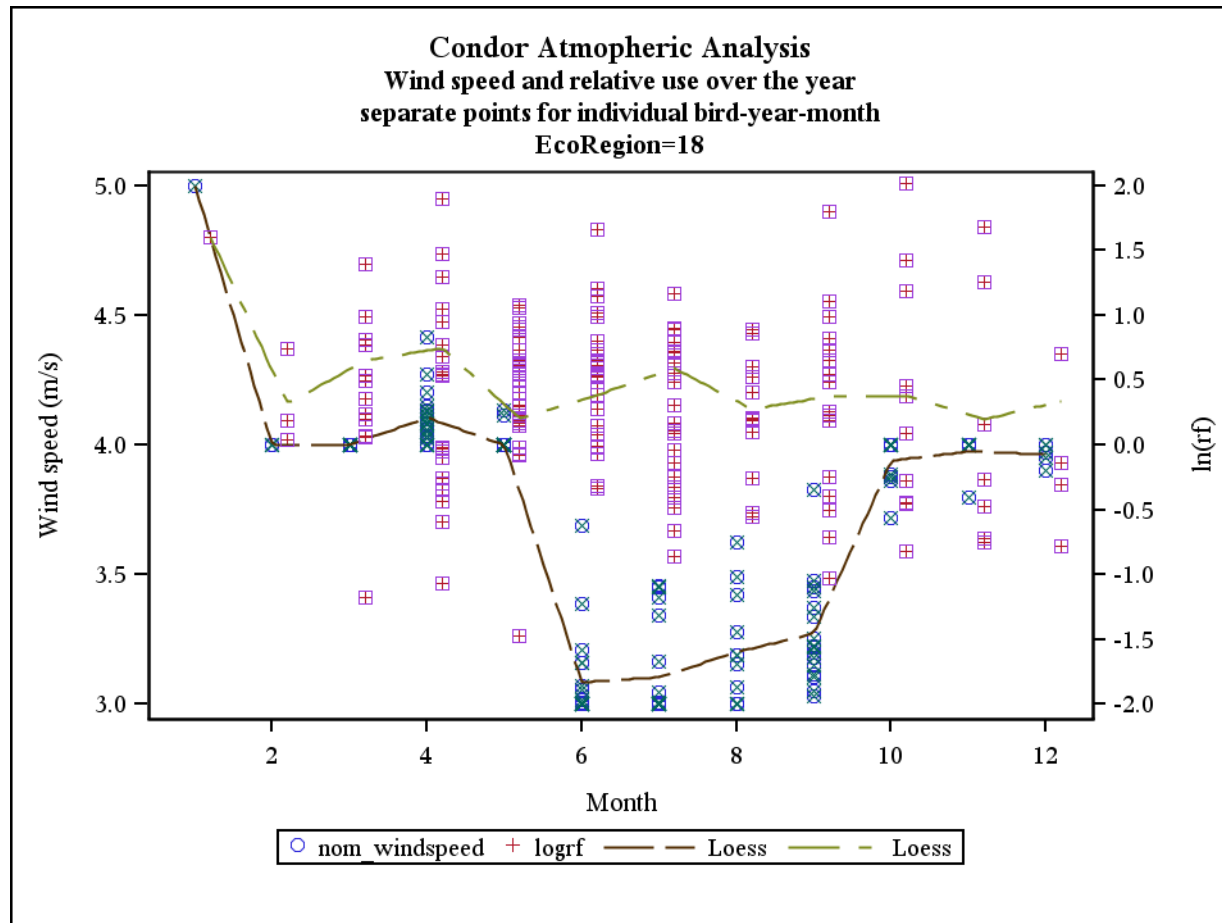

EcoRegion=39

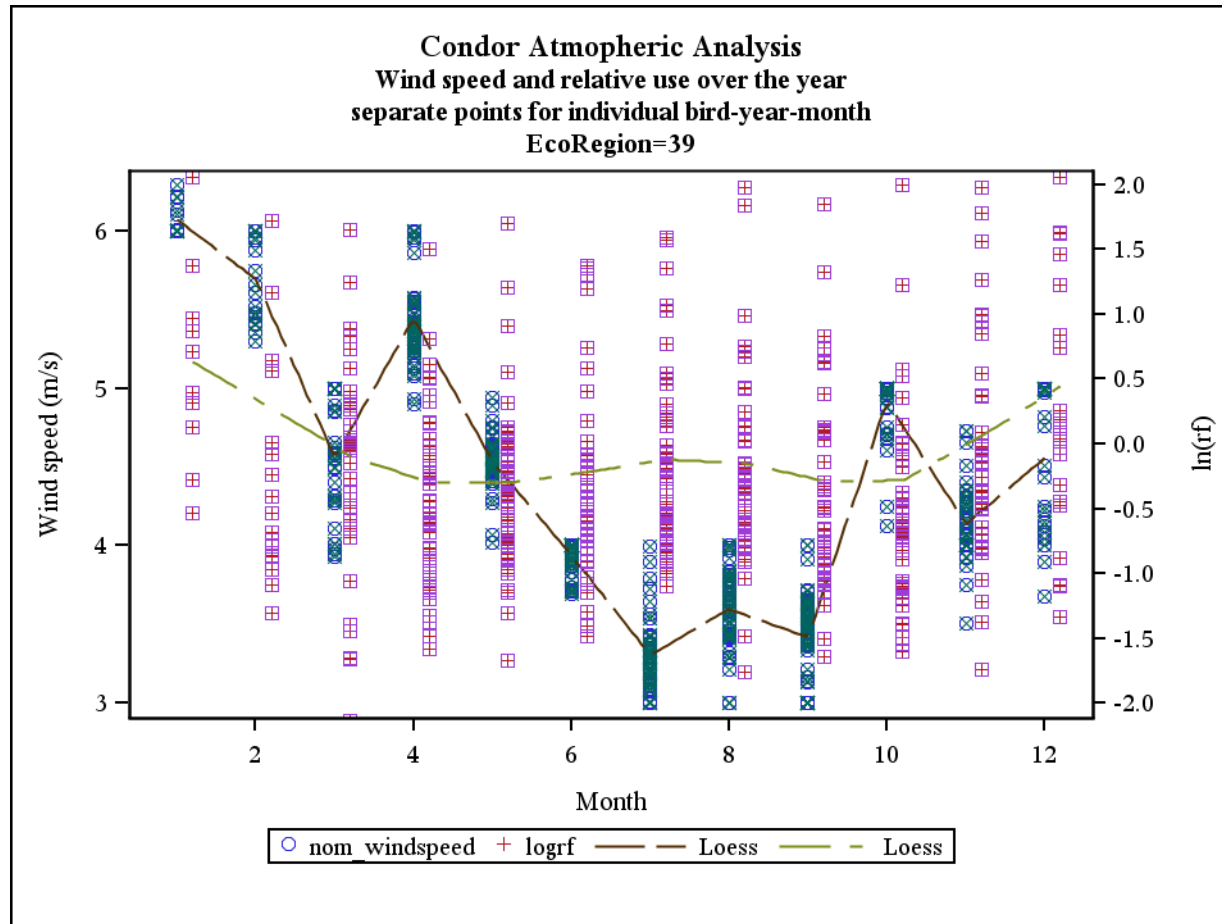

EcoRegion=40

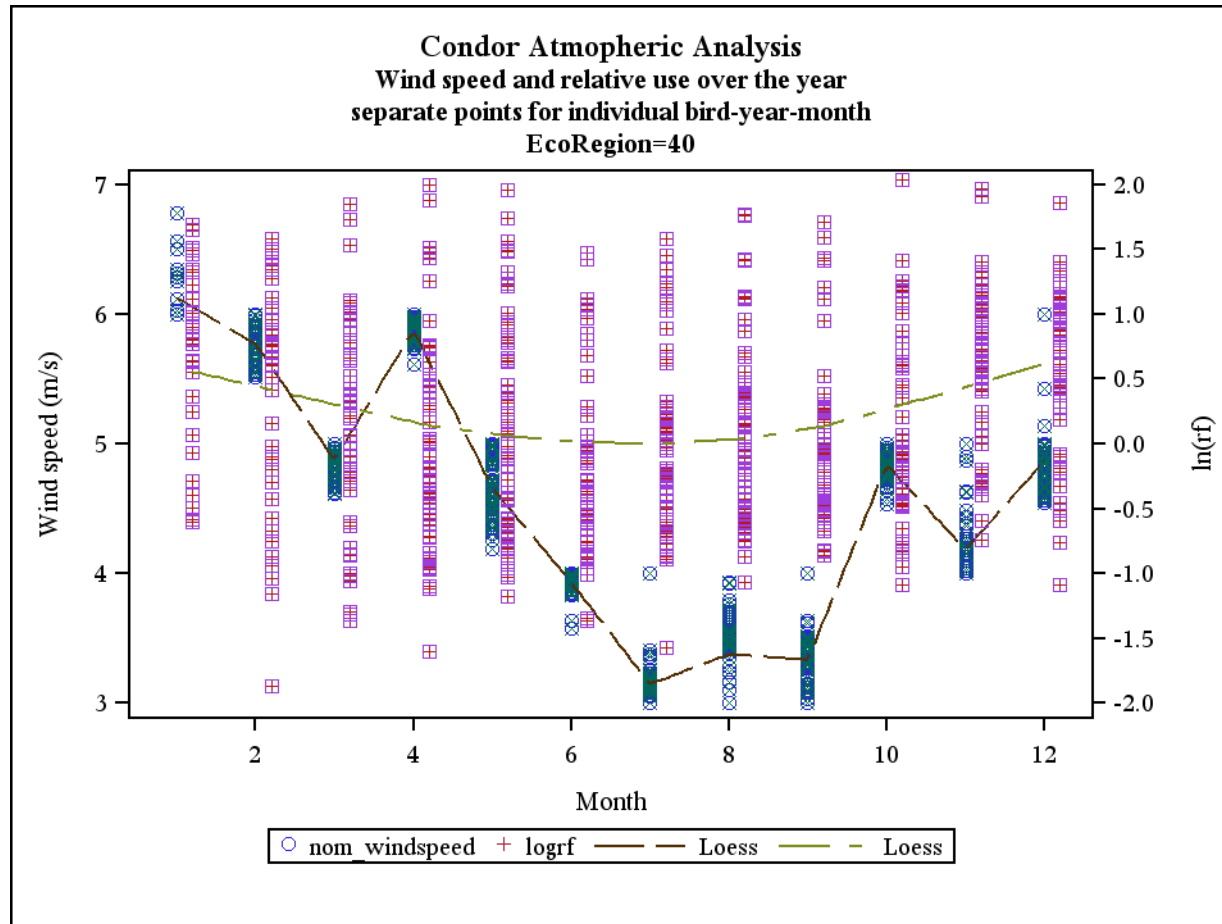

EcoRegion=95

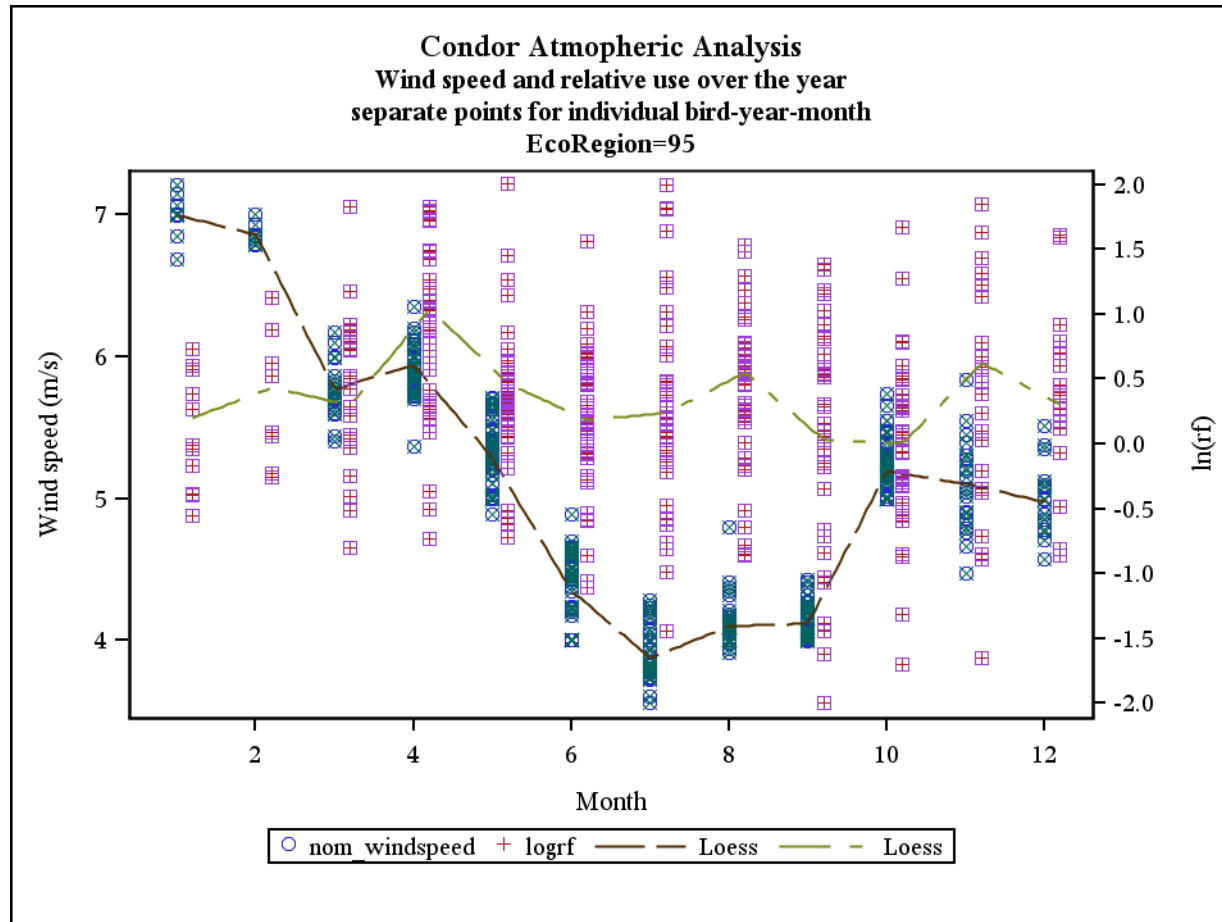

EcoRegion=101

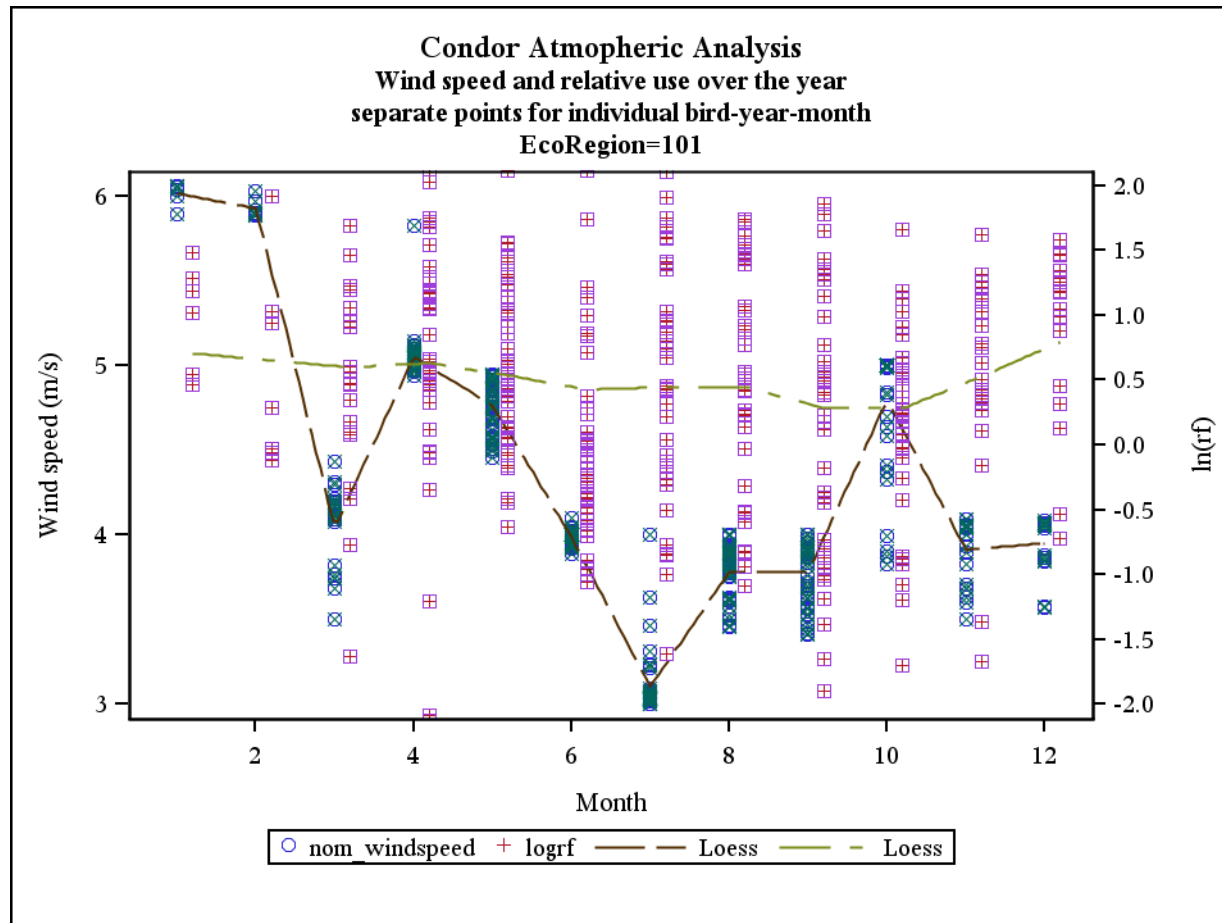

EcoRegion=102

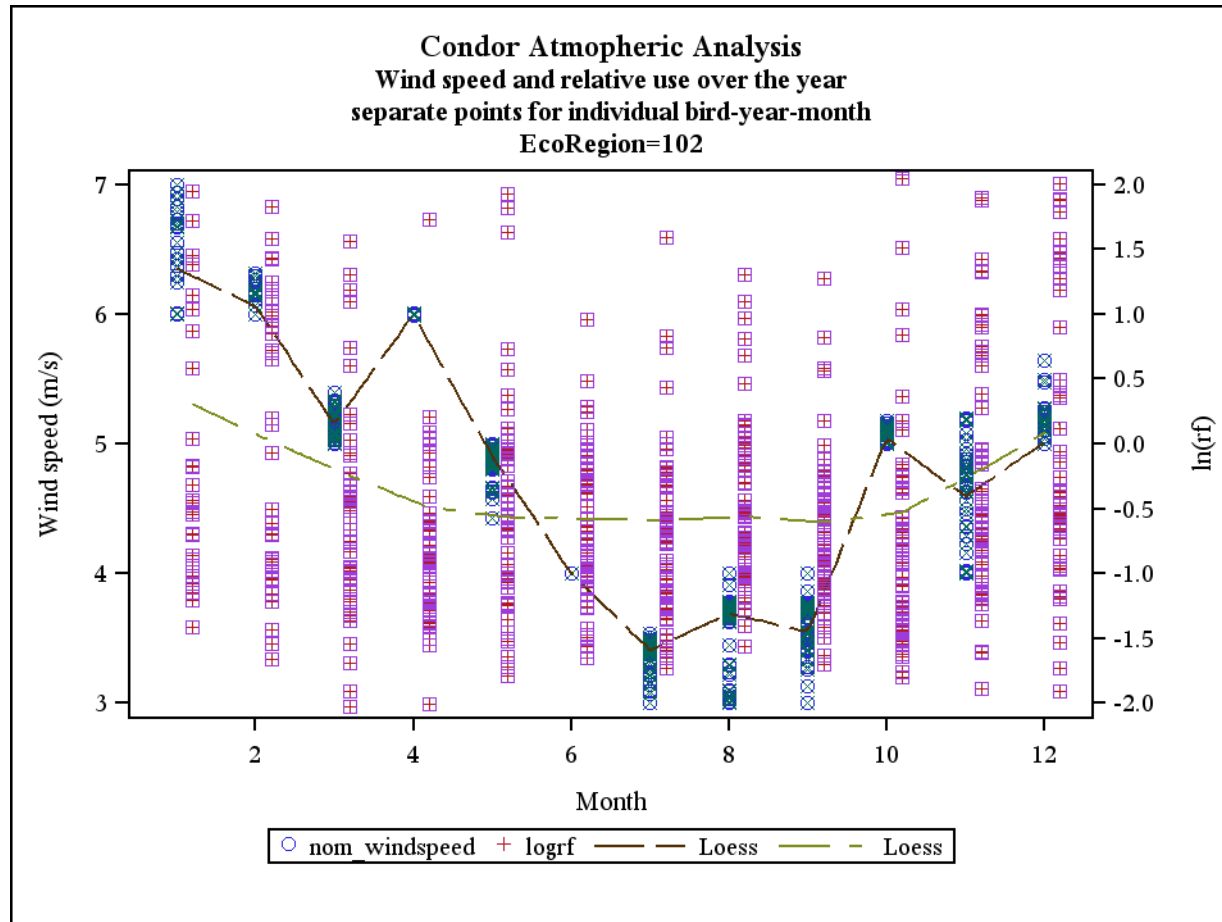

EcoRegion=116

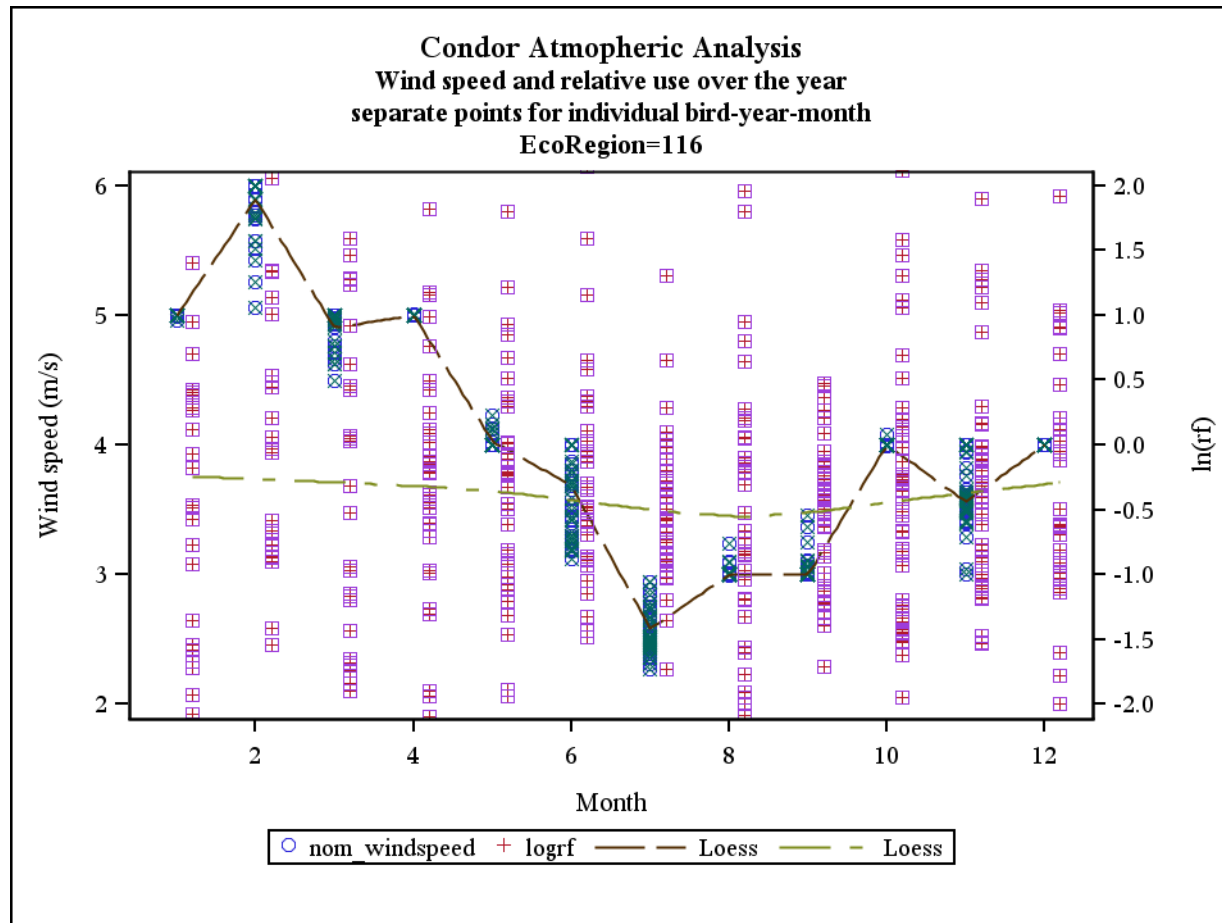

EcoRegion=117

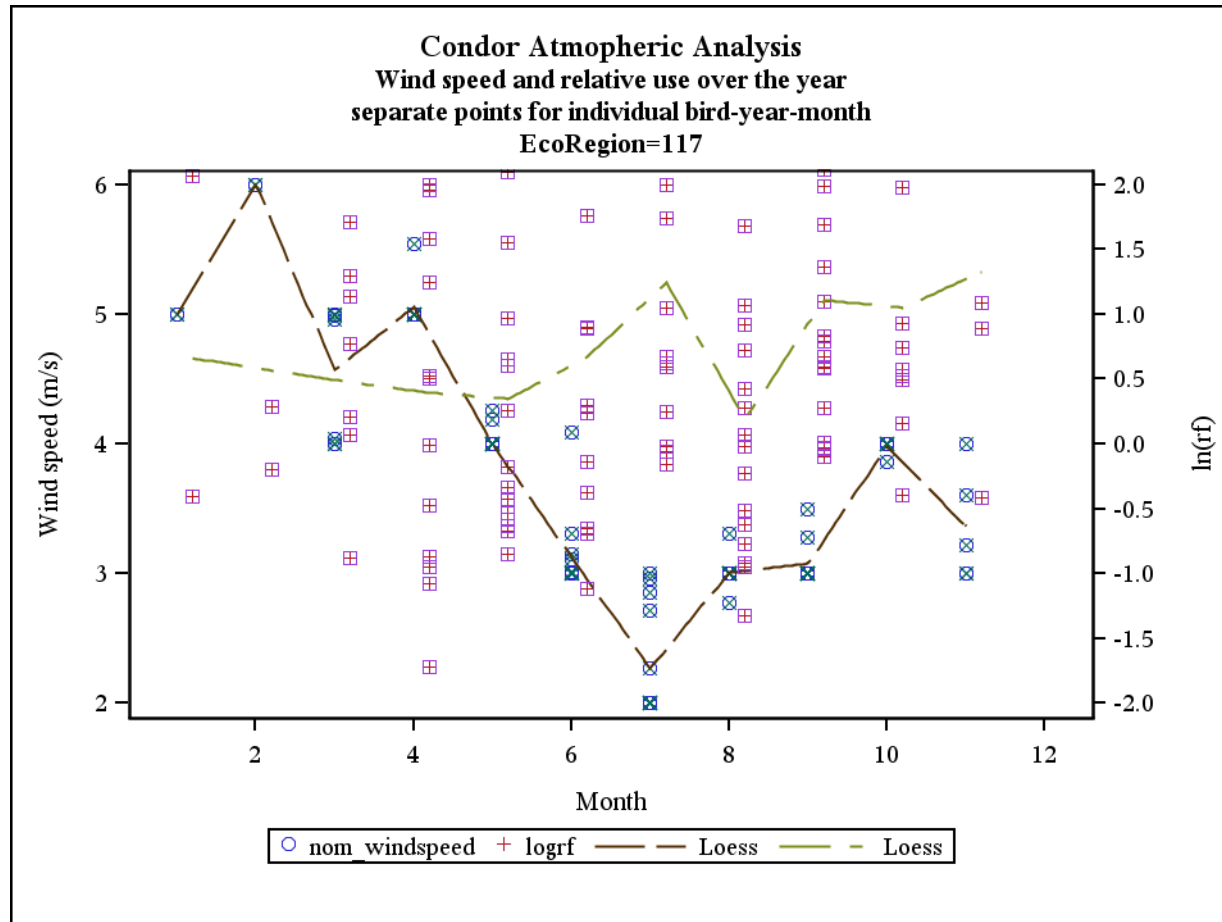

EcoRegion=118

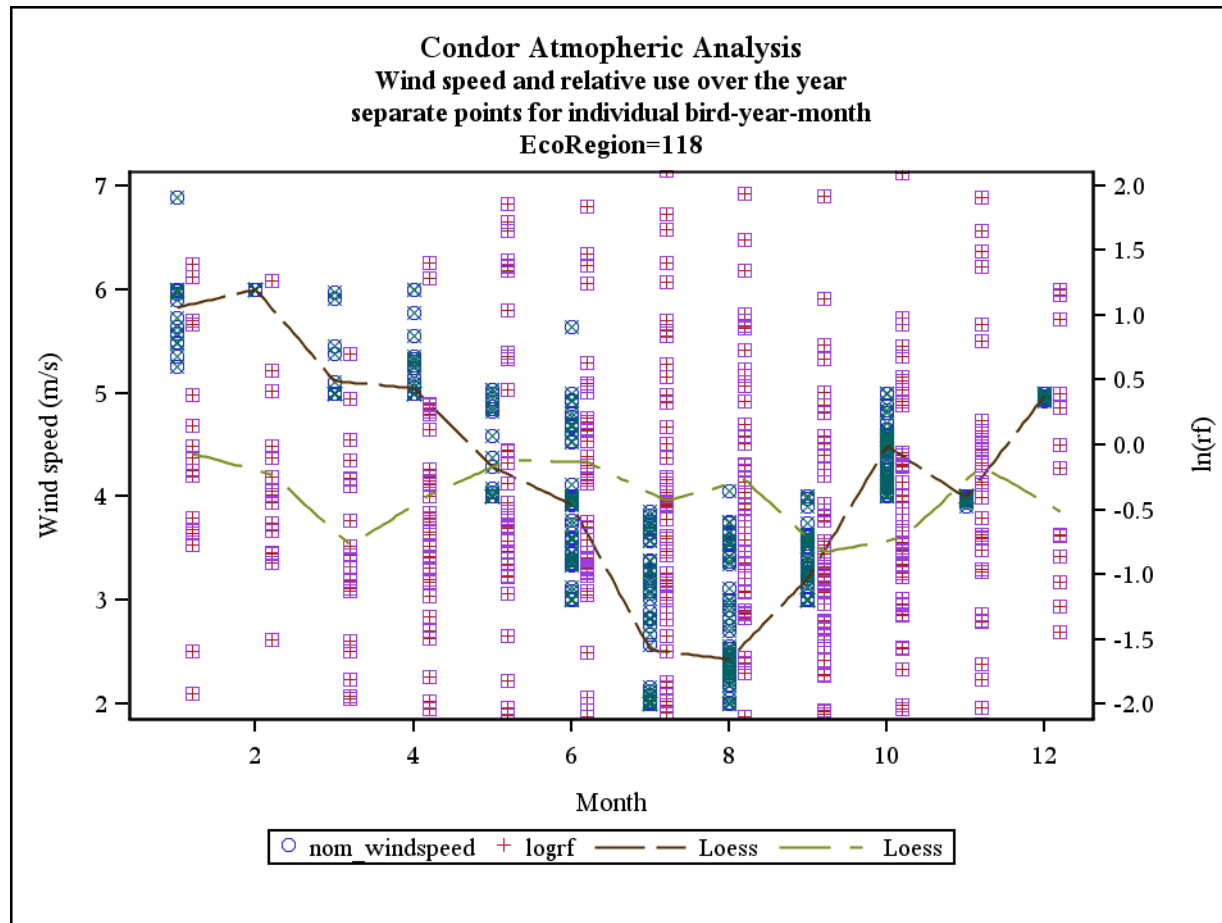

EcoRegion=119

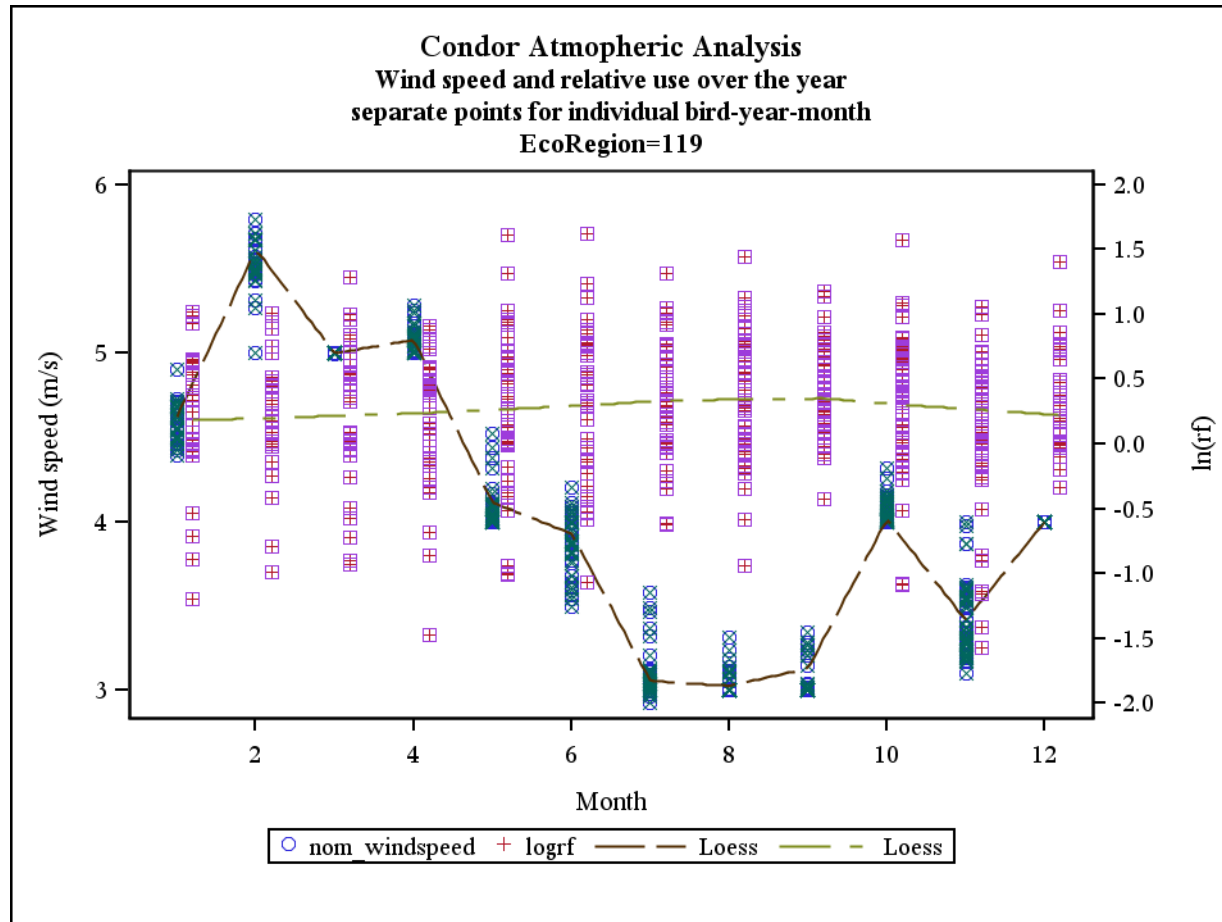

EcoRegion=123

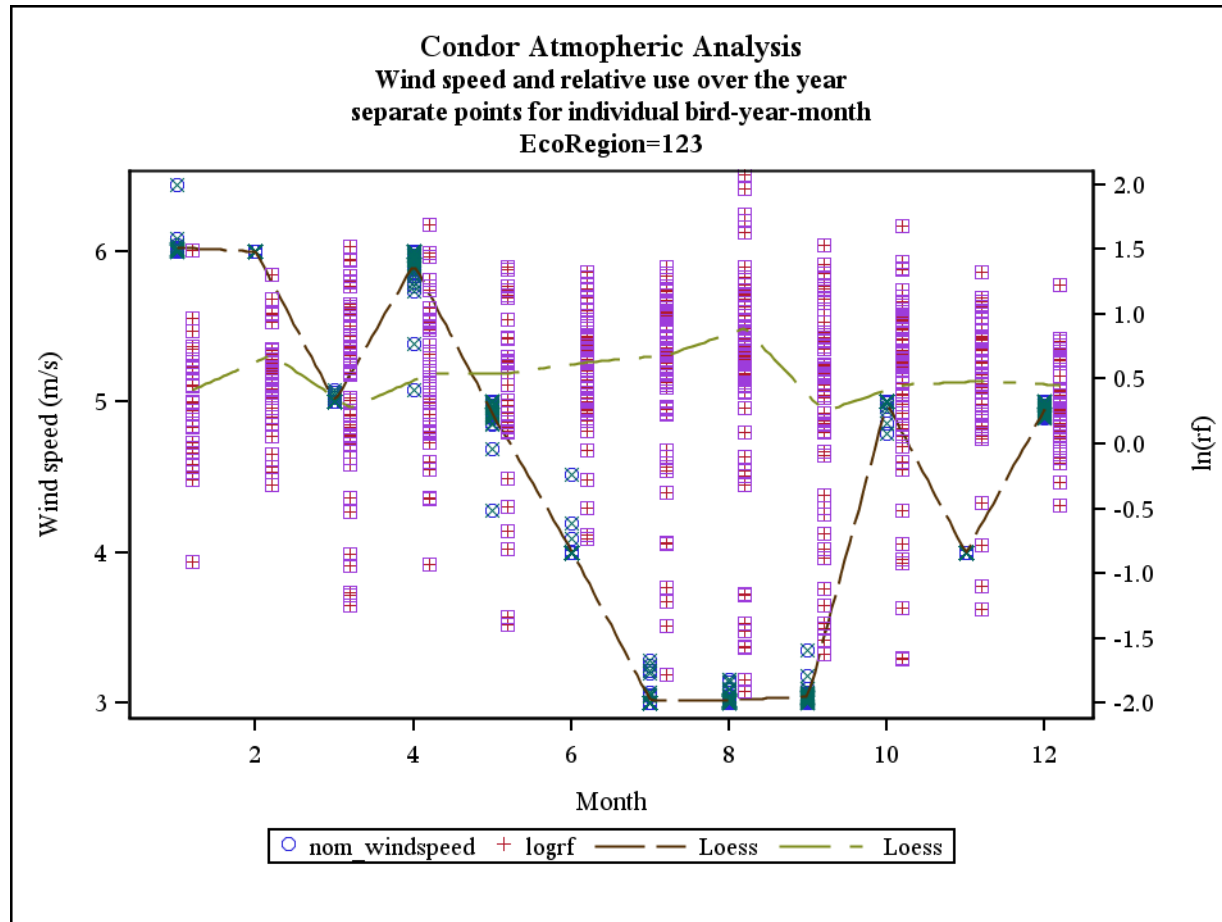

EcoRegion=124

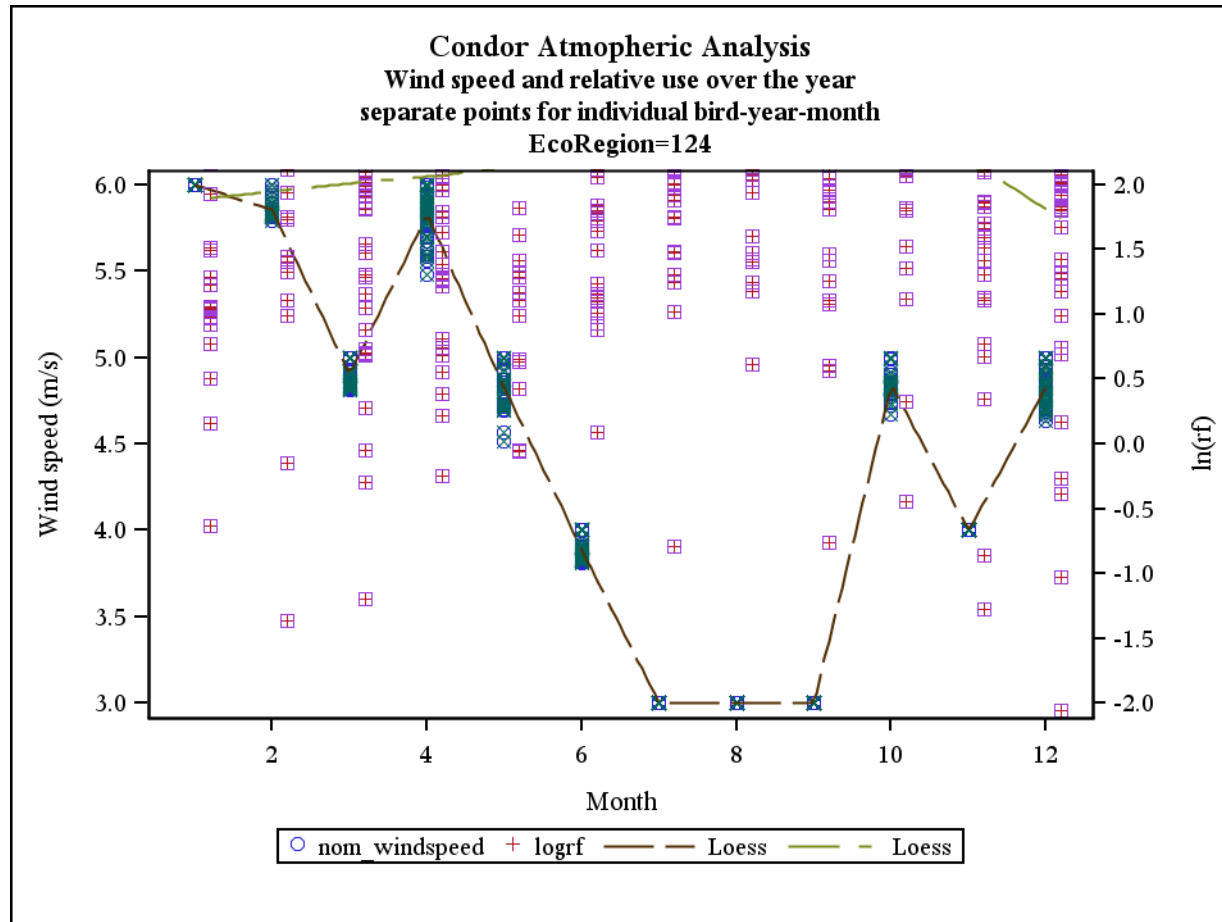

EcoRegion=125

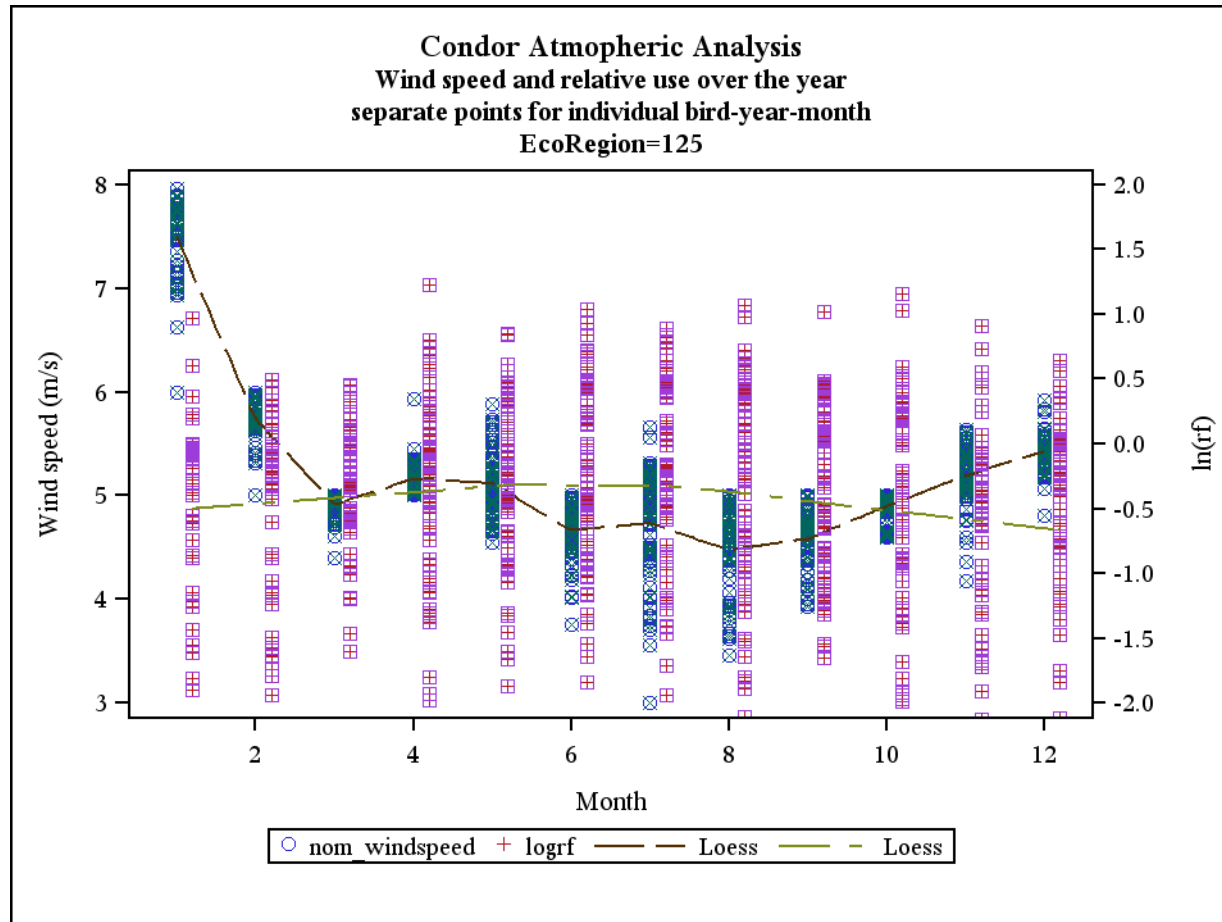

EcoRegion=126

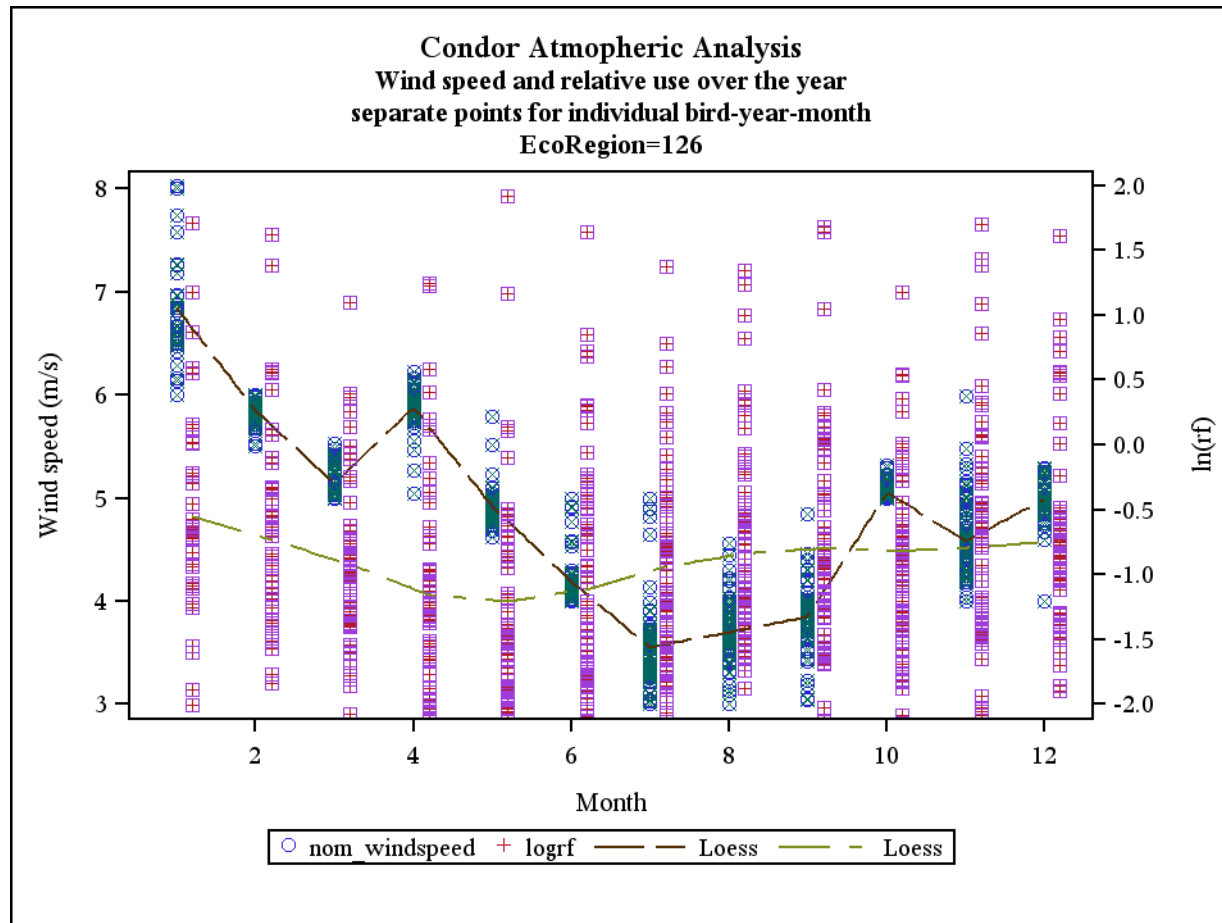

EcoRegion=127

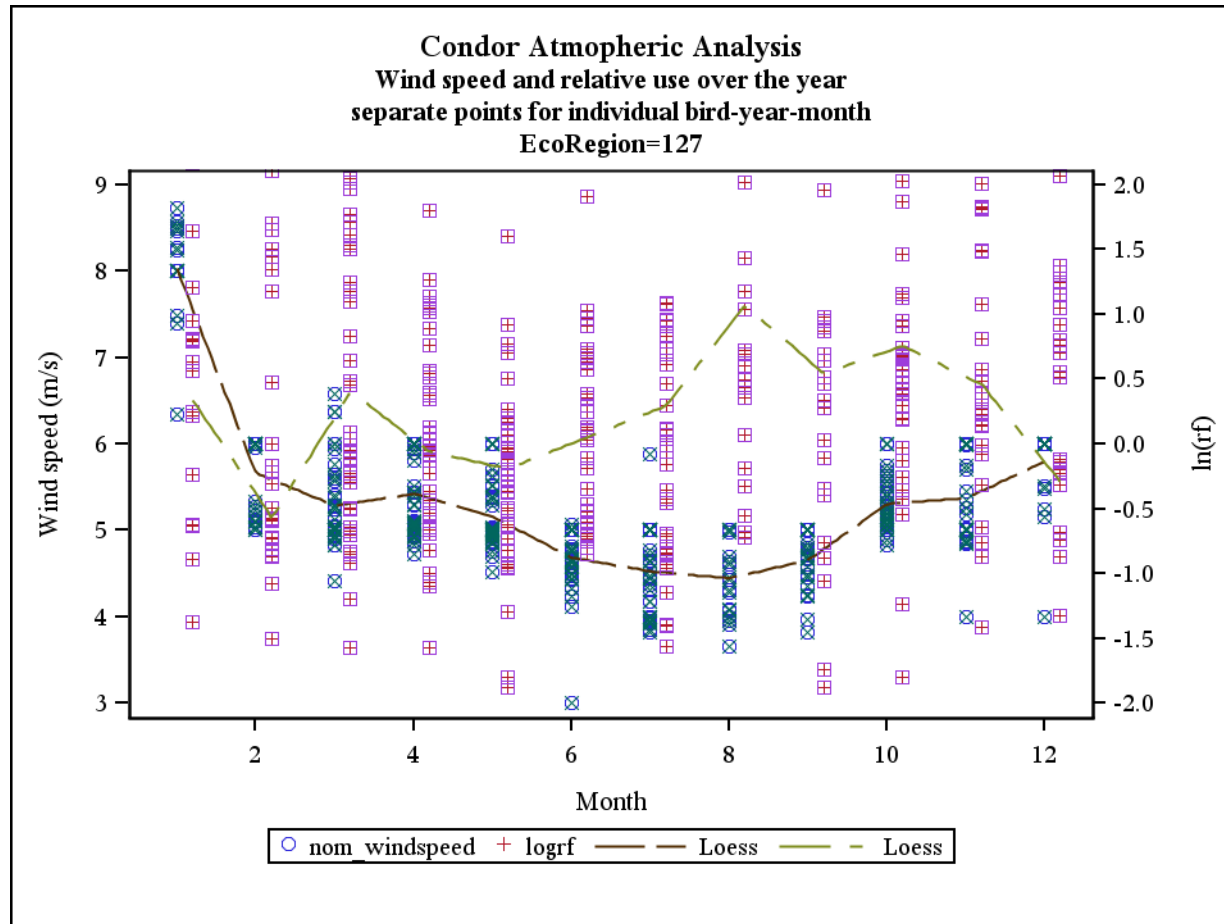

EcoRegion=128

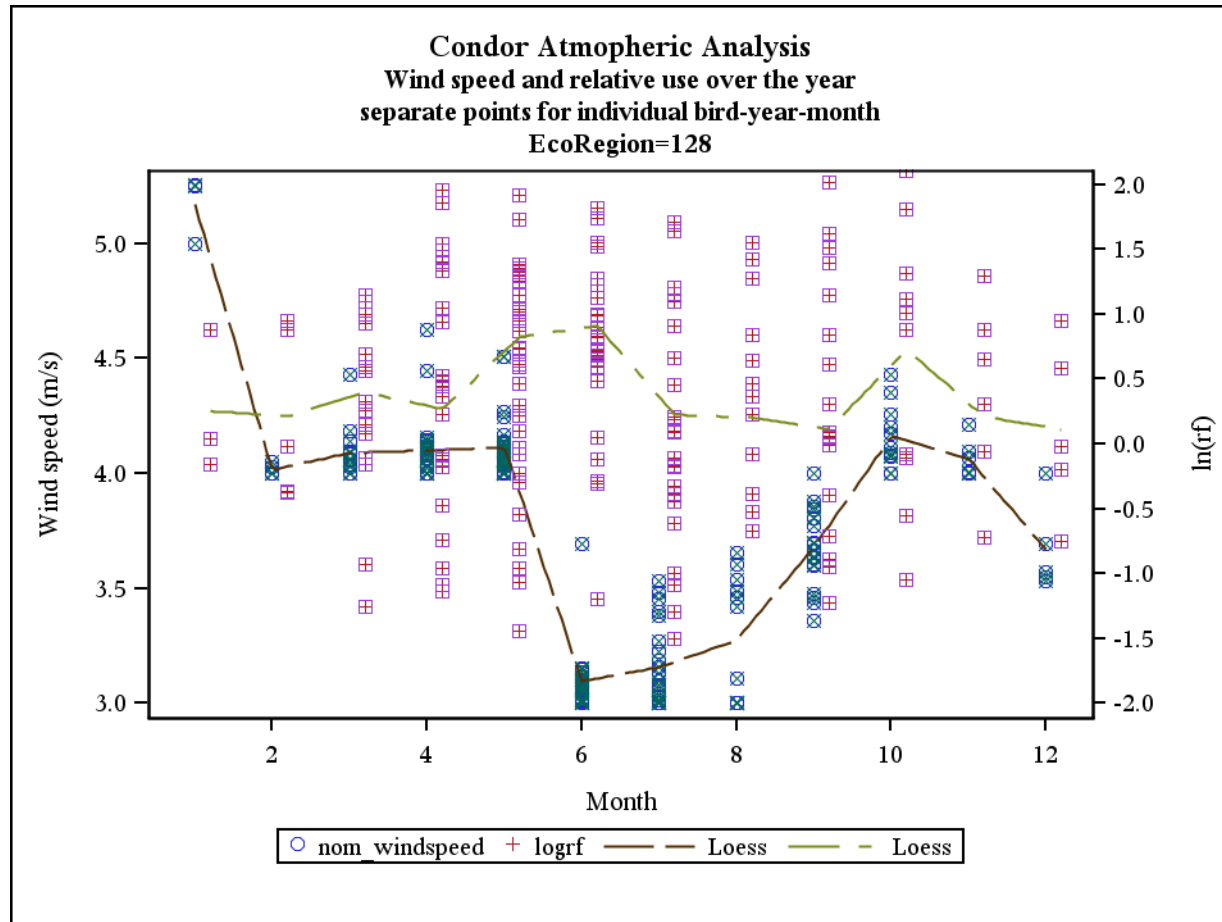

EcoRegion=147

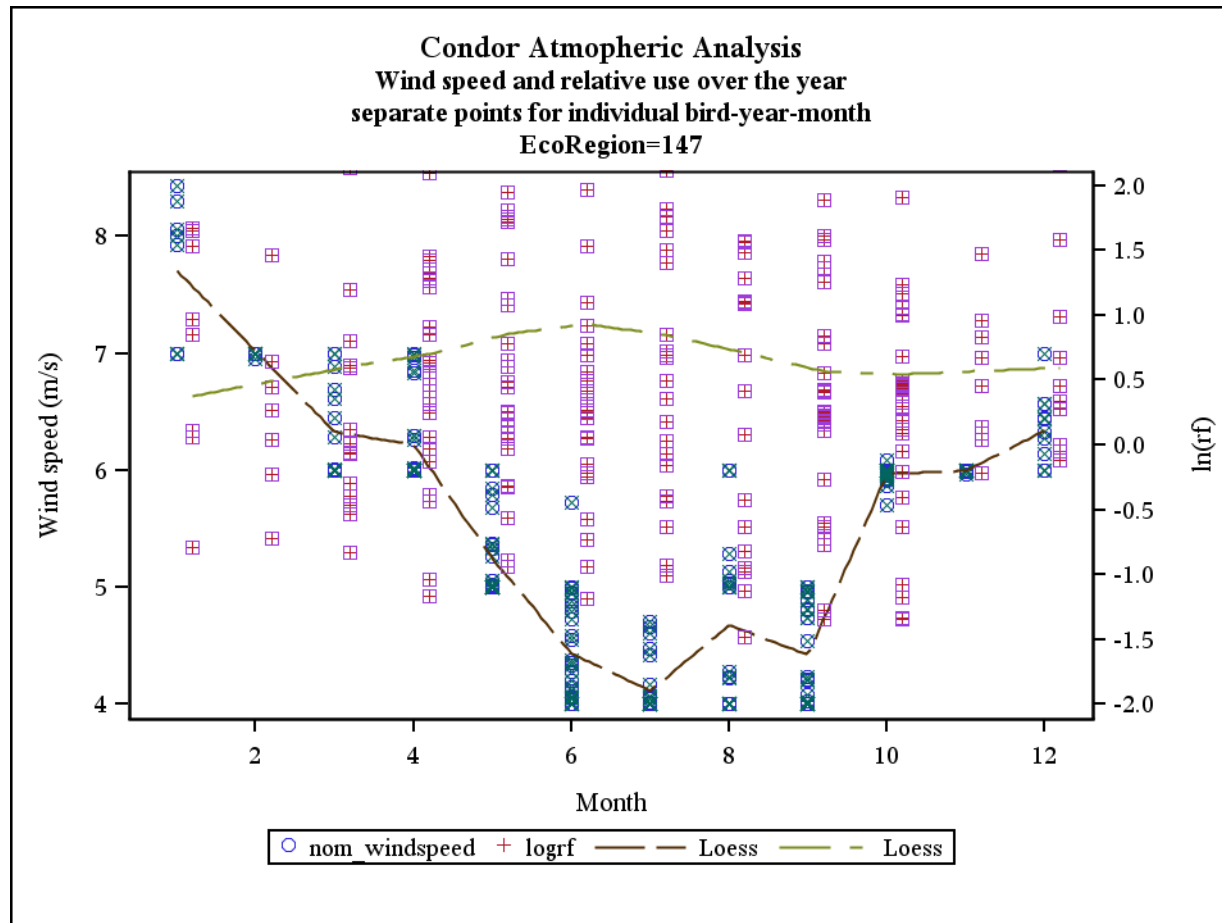

EcoRegion=192

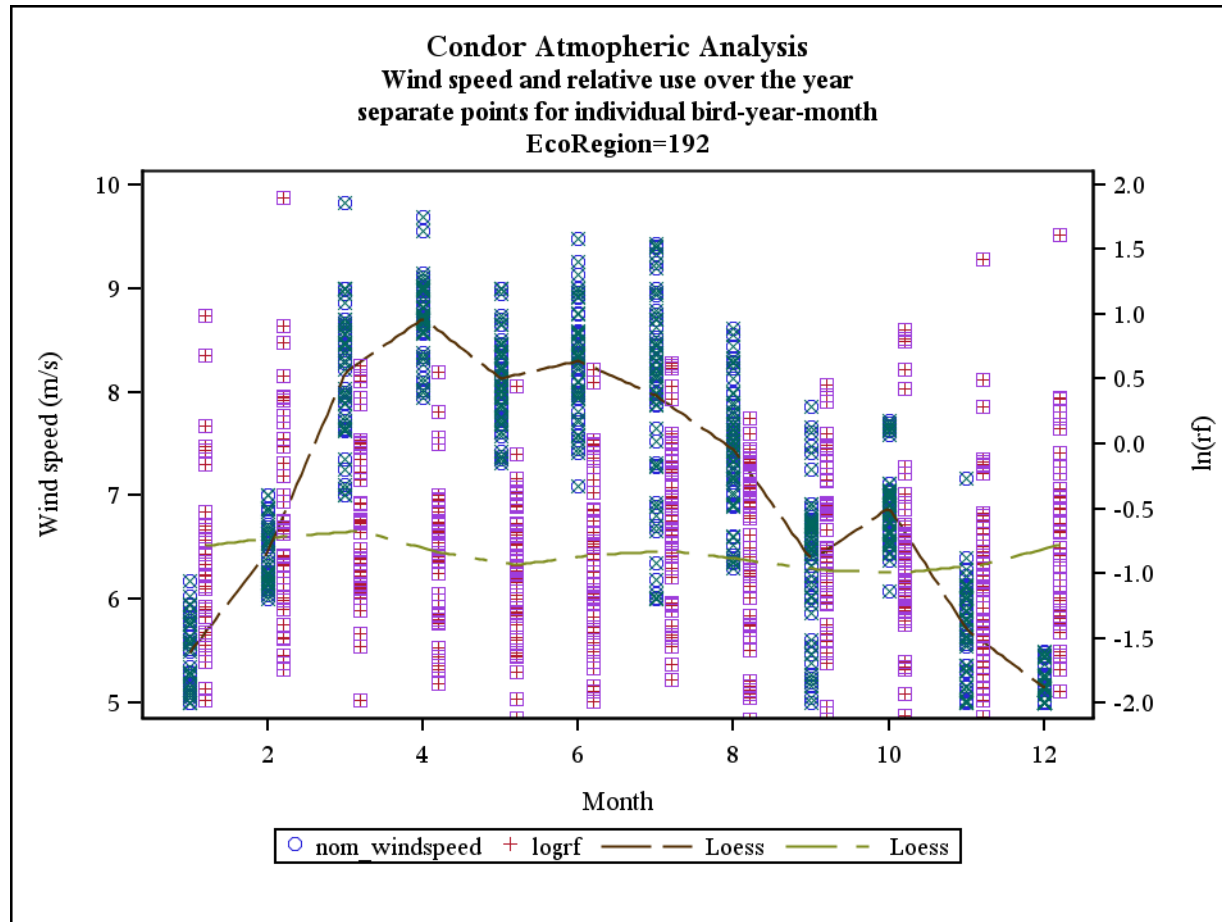

EcoRegion=193

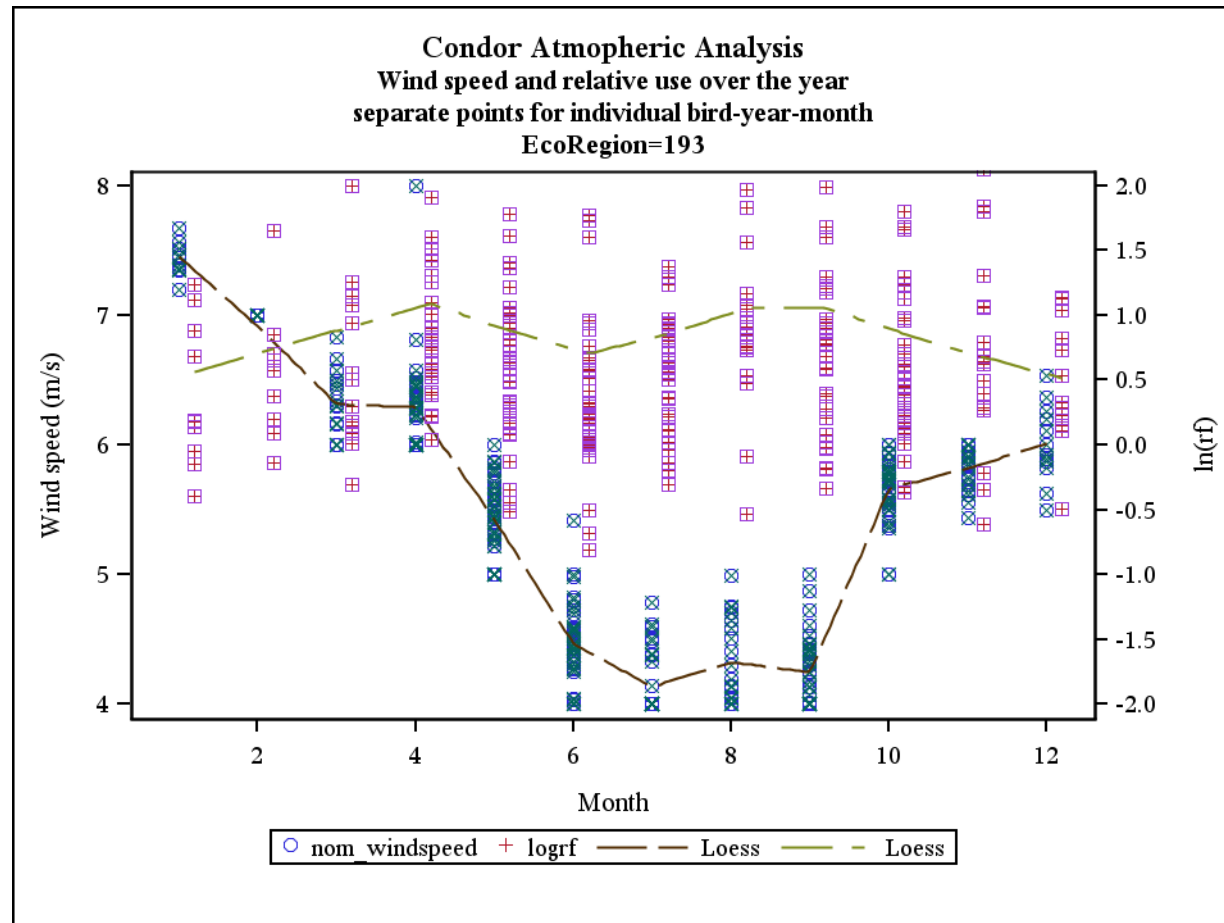

Source: https://storage.googleapis.com/plos-corpus-prod/10.1371/journal.pone.0088430/1/pone.0088430.s006.pdf
