# Supplementary material for: Resource Selection by the California Condor (Gymnogyps californianus) Relative to Terrestrial-Based Habitats and Meteorological Conditions
Source: PLOS journal article supplement (doi:10.1371/journal.pone.0088430), 2014-02-11
Supplement: S1 (10.1371/journal.pone.0088430.s001) [file journal.pone.0088430.s001]

Document S1. Table of 244 distinct landcover classifications taken from Comer et al. (2003) for the state of California and reclassified into 12 distinct habitat types to eliminate redundancy in landcover classifications and to express landcover in units that were ecologically relevant to condors.

| Habitat type     | Original name                                                                |
|------------------|------------------------------------------------------------------------------|
| Agriculture      | Ag Crop Production                                                           |
| Coast, Dune      | Mediterranean California Southern Coastal Dune                               |
| Coast, Dune      | Mediterranean California Northern Coastal Dune                               |
| Coast, Dune      | North Pacific Maritime Coastal Sand Dune and Strand                          |
| Coast, Rock      | North Pacific Coastal Cliff and Bluff                                        |
| Coast, Rock      | Mediterranean California Coastal Bluff                                       |
| Deciduous Forest | North Pacific Oak Woodland                                                   |
| Deciduous Forest | Northern Rocky Mountain Western Larch Savanna                                |
| Deciduous Forest | Rocky Mountain Aspen Forest and Woodland                                     |
| Deciduous Forest | Rocky Mountain Bigtooth Maple Ravine Woodland                                |
| Deciduous Forest | Northwestern Great Plains Aspen Forest and Parkland                          |
| Evergreen Forest | Central and Southern California Mixed Evergreen Woodland                     |
| Evergreen Forest | California Coastal Redwood Forest                                            |
| Evergreen Forest | Colorado Plateau Pinyon-Juniper Woodland                                     |
| Evergreen Forest | Columbia Plateau Western Juniper Woodland and Savanna                        |
| Evergreen Forest | East Cascades Mesic Montane Mixed-Conifer Forest and Woodland                |
| Evergreen Forest | Great Basin Pinyon-Juniper Woodland                                          |
| Evergreen Forest | Inter-Mountain Basins Subalpine Limber-Bristlecone Pine Woodland             |
| Evergreen Forest | Klamath-Siskiyou Lower Montane Serpentine Mixed Conifer Woodland             |
| Evergreen Forest | Klamath-Siskiyou Upper Montane Serpentine Mixed Conifer Woodland             |
| Evergreen Forest | Madrean Encinal                                                              |
| Evergreen Forest | Madrean Lower Montane Pine-Oak Forest and Woodland                           |
| Evergreen Forest | Madrean Pinyon-Juniper Woodland                                              |
| Evergreen Forest | Madrean Upper Montane Conifer-Oak Forest and Woodland                        |
| Evergreen Forest | Mediterranean California Dry-Mesic Mixed Conifer Forest and Woodland         |
| Evergreen Forest | Mediterranean California Mesic Mixed Conifer Forest and Woodland             |
| Evergreen Forest | Mediterranean California Mixed Oak Woodland                                  |
| Evergreen Forest | Mediterranean California Lower Montane Black Oak-Conifer Forest and Woodland |
| Evergreen Forest | California Montane Jeffrey Pine-(Ponderosa Pine) Woodland                    |
| Evergreen Forest | Mediterranean California Red Fir Forest                                      |
| Evergreen Forest | Mediterranean California Subalpine Woodland                                  |
| Evergreen Forest | North Pacific Dry Douglas-fir-(Madrone) Forest and Woodland                  |
| Evergreen Forest | North Pacific Hypermaritime Sitka Spruce Forest                              |
| Evergreen Forest | North Pacific Maritime Dry-Mesic Douglas-fir-Western Hemlock Forest          |
| Evergreen Forest | North Pacific Maritime Mesic Subalpine Parkland                              |
| Evergreen Forest | North Pacific Maritime Mesic-Wet Douglas-fir-Western Hemlock Forest          |
| Evergreen Forest | North Pacific Mountain Hemlock Forest                                        |
| Evergreen Forest | North Pacific Mesic Western Hemlock-Silver Fir Forest                        |
| Evergreen Forest | Mediterranean California Mixed Evergreen Forest                              |
| Evergreen Forest | Northern California Mesic Subalpine Woodland                                 |
| Evergreen Forest | Northern Rocky Mountain Dry-Mesic Montane Mixed Conifer Forest               |
| Evergreen Forest | Northern Rocky Mountain Subalpine Woodland and Parkland                      |
| Evergreen Forest | Northern Rocky Mountain Mesic Montane Mixed Conifer Forest                   |
| Evergreen Forest | Rocky Mountain Foothill Limber Pine-Juniper Woodland                         |
| Evergreen Forest | Rocky Mountain Lodgepole Pine Forest                                         |
| Evergreen Forest | Southern Rocky Mountain Dry-Mesic Montane Mixed Conifer Forest and Woodland  |
| Evergreen Forest | Southern Rocky Mountain Mesic Montane Mixed Conifer Forest and Woodland      |
| Evergreen Forest | Northern Rocky Mountain Ponderosa Pine Woodland and Savanna                  |
| Evergreen Forest | Southern Rocky Mountain Ponderosa Pine Woodland                              |
| Evergreen Forest | Rocky Mountain Subalpine Dry-Mesic Spruce-Fir Forest and Woodland            |
| Evergreen Forest | Rocky Mountain Subalpine Mesic-Wet Spruce-Fir Forest and Woodland            |
| Evergreen Forest | Rocky Mountain Subalpine-Montane Limber-Bristlecone Pine Woodland            |
| Evergreen Forest | Sierra Nevada Subalpine Lodgepole Pine Forest and Woodland                   |
| Evergreen Forest | Southern Rocky Mountain Pinyon-Juniper Woodland                              |

|                  |                                                                          |
|------------------|--------------------------------------------------------------------------|
| Evergreen Forest | Middle Rocky Mountain Montane Douglas-fir Forest and Woodland            |
| Evergreen Forest | Rocky Mountain Poor-Site Lodgepole Pine Forest                           |
| Evergreen Forest | California Coastal Closed-Cone Conifer Forest and Woodland               |
| Evergreen Forest | Sierran-Intermontane Desert Western White Pine-White Fir Woodland        |
| Evergreen Forest | North Pacific Hypermaritime Western Red-cedar-Western Hemlock Forest     |
| Evergreen Forest | North Pacific Dry-Mesic Silver Fir-Western Hemlock-Douglas-fir Forest    |
| Evergreen Forest | East Cascades Oak-Ponderosa Pine Forest and Woodland                     |
| Evergreen Forest | Inter-Mountain Basins Aspen-Mixed Conifer Forest and Woodland            |
| Evergreen Forest | Inter-Mountain Basins Curl-leaf Mountain Mahogany Woodland and Shrubland |
| Evergreen Forest | North Pacific Broadleaf Landslide Forest and Shrubland                   |
| Evergreen Forest | North Pacific Wooded Volcanic Flowage                                    |
| Grassland        | California Annual Grassland                                              |
| Grassland        | California Central Valley and Southern Coastal Grassland                 |
| Grassland        | California Mesic Serpentine Grassland                                    |
| Grassland        | California Northern Coastal Grassland                                    |
| Grassland        | Chihuahuan Sandy Plains Semi-Desert Grassland                            |
| Grassland        | Columbia Basin Foothill and Canyon Dry Grassland                         |
| Grassland        | Inter-Mountain Basins Semi-Desert Grassland                              |
| Grassland        | Mediterranean California Alpine Dry Tundra                               |
| Grassland        | Mediterranean California Subalpine Meadow                                |
| Grassland        | North Pacific Montane Grassland                                          |
| Grassland        | Northern Rocky Mountain Lower Montane, Foothill and Valley Grassland     |
| Grassland        | Northern Rocky Mountain Subalpine-Upper Montane Grassland                |
| Grassland        | Northwestern Great Plains Mixedgrass Prairie                             |
| Grassland        | Columbia Basin Palouse Prairie                                           |
| Grassland        | Rocky Mountain Alpine Fell-Field                                         |
| Grassland        | Rocky Mountain Alpine Turf                                               |
| Grassland        | Rocky Mountain Subalpine-Montane Mesic Meadow                            |
| Grassland        | Southern Rocky Mountain Montane-Subalpine Grassland                      |
| Grassland        | North Pacific Alpine and Subalpine Dry Grassland                         |
| Grassland        | North Pacific Hypermaritime Shrub and Herbaceous Headland                |
| Grassland        | North Pacific Herbaceous Bald and Bluff                                  |
| Grassland        | Chihuahuan Loamy Plains Desert Grassland                                 |
| Modified Land    | Non-Specific Disturbed                                                   |
| Modified Land    | Recently Burned                                                          |
| Modified Land    | Recently Logged Areas                                                    |
| Modified Land    | Recently Logged Timberland-Herbaceous Cover                              |
| Modified Land    | Recently Logged Timberland-Shrubland Cover                               |
| Modified Land    | Recently Logged Timberland-Woodland Cover                                |
| Modified Land    | Recently Burned Herbaceous                                               |
| Modified Land    | Ruderal Upland - Old Field                                               |
| Modified Land    | Introduced Upland Vegetation - Treed                                     |
| Modified Land    | Introduced Upland Vegetation - Shrub                                     |
| Modified Land    | Introduced Upland Vegetation - Annual and Biennial Forbland              |
| Modified Land    | Introduced Upland Vegetation - Annual Grassland                          |
| Modified Land    | Introduced Upland Vegetation - Perennial Grassland and Forbland          |
| Modified Land    | Introduced Riparian Vegetation                                           |
| Modified Land    | Introduced Wetland Vegetation                                            |
| Modified Land    | Recently Burned Forest and Woodland                                      |
| Modified Land    | Harvested forest-tree regeneration                                       |
| Modified Land    | Recently Logged Timberland                                               |
| Savanna          | California Central Valley Mixed Oak Savanna                              |
| Savanna          | California Coastal Live Oak Woodland and Savanna                         |
| Savanna          | California Lower Montane Blue Oak-Foothill Pine Woodland and Savanna     |
| Savanna          | Inter-Mountain Basins Juniper Savanna                                    |
| Savanna          | Madrean Juniper Savanna                                                  |
| Savanna          | Southern Rocky Mountain Ponderosa Pine Savanna                           |

|           |                                                                           |
|-----------|---------------------------------------------------------------------------|
| Savanna   | Southern California Oak Woodland and Savanna                              |
| Savanna   | Willamette Valley Upland Prairie and Savanna                              |
| Savanna   | Northern Rocky Mountain Foothill Conifer Wooded Steppe                    |
| Shrubland | Mediterranean California Mesic Serpentine Woodland and Chaparral          |
| Shrubland | Colorado Plateau Mixed Low Sagebrush Shrubland                            |
| Shrubland | Columbia Plateau Scabland Shrubland                                       |
| Shrubland | Inter-Mountain Basins Mat Saltbush Shrubland                              |
| Shrubland | Mediterranean California Alpine Fell-Field                                |
| Shrubland | North Pacific Dry and Mesic Alpine Dwarf-Shrubland, Fell-field and Meadow |
| Shrubland | Rocky Mountain Alpine Dwarf-Shrubland                                     |
| Shrubland | Sierra Nevada Alpine Dwarf-Shrubland                                      |
| Shrubland | Wyoming Basins Dwarf Sagebrush Shrubland and Steppe                       |
| Shrubland | Chihuahuan Creosotebush Desert Scrub                                      |
| Shrubland | Chihuahuan Mixed Salt Desert Scrub                                        |
| Shrubland | Chihuahuan Stabilized Coppice Dune and Sand Flat Scrub                    |
| Shrubland | Chihuahuan Succulent Desert Scrub                                         |
| Shrubland | Colorado Plateau Blackbrush-Mormon-tea Shrubland                          |
| Shrubland | Great Basin Xeric Mixed Sagebrush Shrubland                               |
| Shrubland | Inter-Mountain Basins Big Sagebrush Shrubland                             |
| Shrubland | Inter-Mountain Basins Mixed Salt Desert Scrub                             |
| Shrubland | Mojave Mid-Elevation Mixed Desert Scrub                                   |
| Shrubland | North Pacific Avalanche Chute Shrubland                                   |
| Shrubland | North Pacific Montane Shrubland                                           |
| Shrubland | Rocky Mountain Lower Montane-Foothill Shrubland                           |
| Shrubland | Sonora-Mojave Creosotebush-White Bursage Desert Scrub                     |
| Shrubland | Sonora-Mojave Mixed Salt Desert Scrub                                     |
| Shrubland | Sonoran Mid-Elevation Desert Scrub                                        |
| Shrubland | Southern California Coastal Scrub                                         |
| Shrubland | Southern Colorado Plateau Sand Shrubland                                  |
| Shrubland | Apacherian-Chihuahuan Mesquite Upland Scrub                               |
| Shrubland | California Maritime Chaparral                                             |
| Shrubland | California Mesic Chaparral                                                |
| Shrubland | California Montane Woodland and Chaparral                                 |
| Shrubland | California Xeric Serpentine Chaparral                                     |
| Shrubland | Chihuahuan Mixed Desert and Thorn Scrub                                   |
| Shrubland | Madrean Oriental Chaparral                                                |
| Shrubland | Colorado Plateau Pinyon-Juniper Shrubland                                 |
| Shrubland | Great Basin Semi-Desert Chaparral                                         |
| Shrubland | Mogollon Chaparral                                                        |
| Shrubland | Northern and Central California Dry-Mesic Chaparral                       |
| Shrubland | Northern Rocky Mountain Montane-Foothill Deciduous Shrubland              |
| Shrubland | Rocky Mountain Gambel Oak-Mixed Montane Shrubland                         |
| Shrubland | Sonora-Mojave Semi-Desert Chaparral                                       |
| Shrubland | Sonoran Paloverde-Mixed Cacti Desert Scrub                                |
| Shrubland | Southern California Dry-Mesic Chaparral                                   |
| Shrubland | Northern Rocky Mountain Subalpine Deciduous Shrubland                     |
| Shrubland | Northern Rocky Mountain Avalanche Chute Shrubland                         |
| Shrubland | Klamath-Siskiyou Xeromorphic Serpentine Savanna and Chaparral             |
| Shrubland | Apacherian-Chihuahuan Semi-Desert Grassland and Steppe                    |
| Shrubland | Columbia Plateau Steppe and Grassland                                     |
| Shrubland | Columbia Plateau Low Sagebrush Steppe                                     |

|                    |                                                                          |
|--------------------|--------------------------------------------------------------------------|
| Shrubland          | Inter-Mountain Basins Big Sagebrush Steppe                               |
| Shrubland          | Inter-Mountain Basins Montane Sagebrush Steppe                           |
| Shrubland          | Inter-Mountain Basins Semi-Desert Shrub-Steppe                           |
| Shrubland          | Northern California Coastal Scrub                                        |
| Shrubland          | North American Warm Desert Wash                                          |
| Sparse Vegetation  | Temperate Pacific Intertidal Flat                                        |
| Sparse Vegetation  | Temperate Pacific Freshwater Mudflat                                     |
| Sparse Vegetation  | North Pacific Volcanic Rock and Cinder Land                              |
| Sparse Vegetation  | North Pacific Montane Massive Bedrock, Cliff and Talus                   |
| Sparse Vegetation  | North Pacific Serpentine Barren                                          |
| Sparse Vegetation  | Mediterranean California Serpentine Barrens                              |
| Sparse Vegetation  | Southern California Coast Ranges Cliff and Canyon                        |
| Sparse Vegetation  | North Pacific Alpine and Subalpine Bedrock and Scree                     |
| Sparse Vegetation  | North American Warm Desert Bedrock Cliff and Outcrop                     |
| Sparse Vegetation  | North American Warm Desert Active and Stabilized Dune                    |
| Sparse Vegetation  | North American Warm Desert Badland                                       |
| Sparse Vegetation  | Inter-Mountain Basins Volcanic Rock and Cinder Land                      |
| Sparse Vegetation  | Rocky Mountain Cliff, Canyon and Massive Bedrock                         |
| Sparse Vegetation  | Rocky Mountain Alpine Bedrock and Scree                                  |
| Sparse Vegetation  | Inter-Mountain Basins Shale Badland                                      |
| Sparse Vegetation  | North American Warm Desert Pavement                                      |
| Sparse Vegetation  | Inter-Mountain Basins Wash                                               |
| Sparse Vegetation  | Inter-Mountain Basins Active and Stabilized Dune                         |
| Sparse Vegetation  | North American Warm Desert Playa                                         |
| Sparse Vegetation  | Central California Coast Ranges Cliff and Canyon                         |
| Sparse Vegetation  | Klamath-Siskiyou Cliff and Outcrop                                       |
| Sparse Vegetation  | Sierra Nevada Cliff and Canyon                                           |
| Sparse Vegetation  | Mediterranean California Alpine Bedrock and Scree                        |
| Sparse Vegetation  | Inter-Mountain Basins Cliff and Canyon                                   |
| Sparse Vegetation  | Columbia Plateau Ash and Tuff Badland                                    |
| Sparse Vegetation  | Inter-Mountain Basins Playa                                              |
| Sparse Vegetation  | North American Warm Desert Volcanic Rockland                             |
| Sparse Vegetation  | Colorado Plateau Mixed Bedrock Canyon and Tableland                      |
| Unsuitable Habitat | Open Water                                                               |
| Unsuitable Habitat | Developed-Open Space                                                     |
| Unsuitable Habitat | Developed-Low Intensity                                                  |
| Unsuitable Habitat | Developed-Medium Intensity                                               |
| Unsuitable Habitat | Developed-High Intensity                                                 |
| Unsuitable Habitat | North American Glacier and Ice Field                                     |
| Wetland            | North Pacific Lowland Mixed Hardwood Conifer Forest and Woodland         |
| Wetland            | California Central Valley Riparian Woodland and Shrubland                |
| Wetland            | Inter-Mountain Basins Greasewood Flat                                    |
| Wetland            | North Pacific Lowland Riparian Forest and Shrubland                      |
| Wetland            | North Pacific Montane Riparian Woodland and Shrubland                    |
| Wetland            | Northern Rocky Mountain Conifer Swamp                                    |
| Wetland            | Western Great Plains Floodplain                                          |
| Wetland            | Northern Rocky Mountain Lower Montane Riparian Woodland and Shrubland    |
| Wetland            | Rocky Mountain Lower Montane-Foothill Riparian Woodland and Shrubland    |
| Wetland            | North Pacific Bog and Fen                                                |
| Wetland            | Great Basin Foothill and Lower Montane Riparian Woodland and Shrubland   |
| Wetland            | Columbia Basin Foothill Riparian Woodland and Shrubland                  |
| Wetland            | Rocky Mountain Subalpine-Montane Riparian Woodland                       |
| Wetland            | North American Warm Desert Lower Montane Riparian Woodland and Shrubland |
| Wetland            | North Pacific Shrub Swamp                                                |

|         |                                                                                           |
|---------|-------------------------------------------------------------------------------------------|
| Wetland | North American Warm Desert Riparian Mesquite Bosque                                       |
| Wetland | North American Warm Desert Riparian Woodland and Shrubland                                |
| Wetland | Rocky Mountain Subalpine-Montane Riparian Shrubland                                       |
| Wetland | Mediterranean California Alkali Marsh                                                     |
| Wetland | North Pacific Hardwood-Conifer Swamp                                                      |
| Wetland | Rocky Mountain Alpine-Montane Wet Meadow                                                  |
| Wetland | Western Great Plains Open Freshwater Depression Wetland                                   |
| Wetland | Temperate Pacific Freshwater Aquatic Bed                                                  |
| Wetland | North Pacific Intertidal Freshwater Wetland                                               |
| Wetland | Willamette Valley Wet Prairie                                                             |
| Wetland | North American Arid West Emergent Marsh                                                   |
| Wetland | North Pacific Maritime Eelgrass Bed                                                       |
| Wetland | Columbia Plateau Vernal Pool                                                              |
| Wetland | Rocky Mountain Subalpine-Montane Fen                                                      |
| Wetland | Mediterranean California Subalpine-Montane Fen                                            |
| Wetland | Northern California Claypan Vernal Pool                                                   |
| Wetland | Mediterranean California Serpentine Fen                                                   |
| Wetland | Western Great Plains Saline Depression Wetland                                            |
| Wetland | Temperate Pacific Freshwater Emergent Marsh                                               |
| Wetland | Temperate Pacific Subalpine-Montane Wet Meadow                                            |
| Wetland | Temperate Pacific Tidal Salt and Brackish Marsh                                           |
| Wetland | Inter-Mountain Basins Alkaline Closed Depression                                          |
| Wetland | Columbia Plateau Silver Sagebrush Seasonally Flooded Shrub-Steppe                         |
| Wetland | Mediterranean California Serpentine Foothill and Lower Montane Riparian Woodland and Seep |
| Wetland | Northwestern Great Plains Riparian                                                        |
| Wetland | Western Great Plains Riparian                                                             |
| Wetland | Mediterranean California Foothill and Lower Montane Riparian Woodland                     |
| Wetland | Chihuahuan-Sonoran Desert Bottomland and Swale Grassland                                  |
