# Supplementary material for: Resource Selection by the California Condor (Gymnogyps californianus) Relative to Terrestrial-Based Habitats and Meteorological Conditions
Source: PLOS journal article supplement (doi:10.1371/journal.pone.0088430), 2014-02-11
Supplement: S3 (10.1371/journal.pone.0088430.s003) [file journal.pone.0088430.s003]

**Document S3.** Ecoregions in the state of California as delineated by Cleland et al. (2007) and used to assess California Condor resource selection relative to atmospheric parameters. Codes correspond with the numbered ecoregions in Document S3.

| <b>Ecoregion</b>                    | <b>Code</b> |
|-------------------------------------|-------------|
| Watsonville Plain-Salinas Valley    | 8           |
| North Coastal Santa Lucia Range     | 9           |
| South Coastal Santa Lucia Range     | 10          |
| Santa Ynez-Sulphur Mountains        | 13          |
| Oxnard Plain-Santa Paula Valley     | 15          |
| Simi Valley-Santa Susana Mountains  | 16          |
| Los Angeles Plain                   | 18          |
| South Valley Alluvium and Basins    | 39          |
| Elk Hills and South Valley Terraces | 40          |
| Tehachapi-Piute Mountains           | 95          |
| Southern Granitic Foothills         | 101         |
| San Emigdio Mountains               | 102         |
| Diablo Range                        | 116         |
| Eastern Hills                       | 117         |
| Interior Santa Lucia Range          | 118         |
| Gabilan Range                       | 119         |
| Caliente Range-Cuyama Valley        | 123         |
| Temblor Range                       | 124         |
| San Rafael-Topatopa Mountains       | 125         |
| Northern Transverse Ranges          | 126         |
| Sierra Pelona-Mint Canyon           | 127         |
| San Gabriel Mountains               | 128         |
| High Desert Plains and Hills        | 147         |
| Water                               | 192         |
| Eastern Slopes                      | 193         |
